# Supplementary material for: Proteome-Wide Search Reveals Unexpected RNA-Binding Proteins in Saccharomyces cerevisiae
Source: PLoS One. 2010 Sep 10;5(9):e12671. doi: 10.1371/journal.pone.0012671 (PMC2937035; doi:10.1371/journal.pone.0012671)
Supplement: Table S3 — Summary of protein microarray data. Proteins are ranked according to the affinity for total yeast mRNA (as measured by Cy5/normalized background). Data (“Mean” signal) are averaged for 3 replicate experiments. (1.18 MB XLS) [file pone.0012671.s003.xls]

## Sheet: ReadMe
Mean= normalized mean signal over median background
Signal and rank averaged from 3 replicate Cy5-total mRNA experiments

## Sheet: TableS3
Protein	Gene	Description	Mean	Rank	RBP
POT1	YIL160C	3-ketoacyl-CoA thiolase with broad chain length specificity, cleaves 3-ketoacyl-CoA into acyl-CoA and acetyl-CoA during beta-oxidation of fatty acids	11.3087	1	No
MDH3	YDL078C	Peroxisomal malate dehydrogenase, catalyzes interconversion of malate and oxaloacetate; involved in the glyoxylate cycle	11.1363	2	No
GCY1	YOR120W	Putative NADP(+) coupled glycerol dehydrogenase, proposed to be involved in an alternative pathway for glycerol catabolism; member of the aldo-keto reductase (AKR) family	10.705	3	No
GIS2	YNL255C	Protein with seven cysteine-rich CCHC zinc-finger motifs, similar to human CNBP, proposed to be involved in the RAS/cAMP signaling pathway	9.111	4	No
RCR2	YDR003W	Vacuolar protein that presumably functions within the endosomal-vacuolar trafficking pathway, affecting events that determine whether plasma membrane proteins are degraded or routed to the plasma membrane; similar to Rcr1p	8.04333	5	No
SIP2	YGL208W	One of three beta subunits of the Snf1 serine/threonine protein kinase complex involved in the response to glucose starvation; null mutants exhibit accelerated aging; N-myristoylprotein localized to the cytoplasm and the plasma membrane	7.35233	6	No
PCS60	YBR222C	Peroxisomal AMP-binding protein, localizes to both the peroxisomal peripheral membrane and matrix, expression is highly inducible by oleic acid, similar to E. coli long chain acyl-CoA synthetase	6.232	7	No
SGN1	YIR001C	Cytoplasmic RNA-binding protein, contains an RNA recognition motif (RRM); may have a role in mRNA translation, as suggested by genetic interactions with genes encoding proteins involved in translational initiation	5.62585	8	Yes
YJL218W	YJL218W	Putative protein of unknown function, similar to bacterial galactoside O-acetyltransferases; induced by oleate in an OAF1/PIP2-dependent manner; promoter contains an oleate response element consensus sequence; non-essential gene	5.456	9	No
YDL124W	YDL124W	NADPH-dependent alpha-keto amide reductase; reduces aromatic alpha-keto amides, aliphatic alpha-keto esters, and aromatic alpha-keto esters; member of the aldo-keto reductase (AKR) family	5.05433	10	No
BUB1	YGR188C	Protein kinase that forms a complex with Mad1p and Bub3p that is crucial in the checkpoint mechanism required to prevent cell cycle progression into anaphase in the presence of spindle damage, associates with centromere DNA via Skp1p	4.57	11	No
DUO1	YGL061C	Essential subunit of the Dam1 complex (aka DASH complex), couples kinetochores to the force produced by MT depolymerization thereby aiding in chromosome segregation; is transferred to the kinetochore prior to mitosis	4.49533	12	No
ETP1	YHL010C	Putative protein of unknown function that is required for growth on ethanol; contains a zinc finger region and has homology to human BRAP2, which is a cytoplasmic protein that binds nuclear localization sequences	4.44867	13	No
MTF1	YMR228W	Mitochondrial RNA polymerase specificity factor with structural similarity to S-adenosylmethionine-dependent methyltransferases and functional similarity to bacterial sigma-factors, interacts with mitochondrial core polymerase Rpo41p	4.25052	14	Yes
RPL8A	YHL033C	Ribosomal protein L4 of the large (60S) ribosomal subunit, nearly identical to Rpl8Bp and has similarity to rat L7a ribosomal protein; mutation results in decreased amounts of free 60S subunits	3.87209	15	Yes
MSD1	YPL104W	Mitochondrial aspartyl-tRNA synthetase, required for acylation of aspartyl-tRNA; yeast and bacterial aspartyl-, asparaginyl-, and lysyl-tRNA synthetases contain regions with high sequence similarity, suggesting a common ancestral gene	3.75	16	Yes
PAD1	YDR538W	Phenylacrylic acid decarboxylase, confers resistance to cinnamic acid, decarboxylates aromatic carboxylic acids to the corresponding vinyl derivatives; homolog of E. coli UbiX	3.6285	17	No
CWC25	YNL245C	Component of a complex containing Cef1p, involved in pre-mRNA splicing; has similarity to S. pombe Cwf25p	3.57967	18	Yes
FOX2	YKR009C	Multifunctional enzyme of the peroxisomal fatty acid beta-oxidation pathway; has 3-hydroxyacyl-CoA dehydrogenase and enoyl-CoA hydratase activities	3.30667	19	No
SCD6	YPR129W	Protein containing an Lsm domain, may bind RNA and have a role in RNA processing; overproduction suppresses a null mutation in CHC1, which encodes the heavy chain of clathrin	3.29833	20	Yes
YGL069C	YGL069C	Dubious open reading frame, unlikely to encode a protein; not conserved in closely related Saccharomyces species; 92% of ORF overlaps the uncharacterized ORF YGL068W; deletion in cyr1 mutant results in loss of stress resistance	3.24867	21	No
PUS4	YNL292W	Pseudouridine synthase, catalyzes only the formation of pseudouridine-55 (Psi55), a highly conserved tRNA modification, in mitochondrial and cytoplasmic tRNAs; PUS4 overexpression leads to translational derepression of GCN4 (Gcd- phenotype)	3.12933	22	Yes
TCM62	YBR044C	Protein involved in the assembly of the mitochondrial succinate dehydrogenase complex; putative chaperone	3.119	23	No
ELP4	YPL101W	Subunit of Elongator complex, which is required for modification of wobble nucleosides in tRNA; required for Elongator structural integrity	3.09333	24	Yes
DIG1	YPL049C	Regulatory protein of unknown function, constitutively-expressed, involved in the regulation of mating-specific genes and the invasive growth pathway, required for MAP-kinase imposed repression, inhibits pheromone-responsive transcription	3.09167	25	No
RPL1B	YGL135W	N-terminally acetylated protein component of the large (60S) ribosomal subunit, nearly identical to Rpl1Ap and has similarity to E. coli L1 and rat L10a ribosomal proteins; rpl1a rpl1b double null mutation is lethal	3.05162	26	Yes
SMD3	YLR147C	Core Sm protein Sm D3; part of heteroheptameric complex (with Smb1p, Smd1p, Smd2p, Sme1p, Smx3p, and Smx2p) that is part of the spliceosomal U1, U2, U4, and U5 snRNPs; homolog of human Sm D3	2.98044	27	Yes
YPR158C-C	YPR158C-C	Retrotransposon TYA Gag gene co-transcribed with TYB Pol; translated as TYA or TYA-TYB polyprotein; Gag is a nucleocapsid protein that is the structural constituent of virus-like particles (VLPs); similar to retroviral Gag	2.96533	28	Yes
ARP8	YOR141C	Nuclear actin-related protein involved in chromatin remodeling, component of chromatin-remodeling enzyme complexes	2.92167	29	No
CPA1	YOR303W	Small subunit of carbamoyl phosphate synthetase, which catalyzes a step in the synthesis of citrulline, an arginine precursor; translationally regulated by an attenuator peptide encoded by YOR302W within the CPA1 mRNA 5'-leader	2.90733	30	No
MPD1	YOR288C	Member of the protein disulfide isomerase (PDI) family; interacts with and inhibits the chaperone activity of Cne1p; MPD1 overexpression in a pdi1 null mutant suppresses defects in Pdi1p functions such as carboxypeptidase Y maturation	2.89433	31	No
DLD2	YDL178W	D-lactate dehydrogenase, located in the mitochondrial matrix	2.87233	32	No
SLM5	YCR024C	Mitochondrial asparaginyl-tRNA synthetase	2.86184	33	Yes
DBP2	YNL112W	Essential ATP-dependent RNA helicase of the DEAD-box protein family, involved in nonsense-mediated mRNA decay and rRNA processing	2.81833	34	Yes
GIM4	YEL003W	Subunit of the heterohexameric cochaperone prefoldin complex which binds specifically to cytosolic chaperonin and transfers target proteins to it	2.818	35	No
YPR147C	YPR147C	Putative protein of unknown function; green fluorescent protein (GFP)-fusion protein localizes to the cytoplasm and is induced in response to the DNA-damaging agent MMS	2.81067	36	No
YAH1	YPL252C	Ferredoxin of the mitochondrial matrix required for formation of cellular iron-sulfur proteins; involved in heme A biosynthesis; homologous to human adrenodoxin	2.80067	37	No
UBP14	YBR058C	Ubiquitin-specific protease that specifically disassembles unanchored ubiquitin chains; involved in fructose-1,6-bisphosphatase (Fbp1p) degradation; similar to human isopeptidase T	2.79667	38	No
NOP58	YOR310C	Protein involved in pre-rRNA processing, 18S rRNA synthesis, and snoRNA synthesis; component of the small subunit processome complex, which is required for processing of pre-18S rRNA	2.796	39	Yes
YOL103W-A	YOL103W-A	Retrotransposon TYA Gag gene co-transcribed with TYB Pol; translated as TYA or TYA-TYB polyprotein; Gag is a nucleocapsid protein that is the structural constituent of virus-like particles (VLPs); similar to retroviral Gag	2.76467	40	Yes
TRM7	YBR061C	2'-O-ribose methyltransferase, methylates the 2'-O-ribose of nucleotides at positions 32 and 34 of the tRNA anticodon loop	2.76033	41	Yes
YDL156W	YDL156W	Putative protein of unknown function; protein sequence contains three WD domains (WD-40 repeat); green fluorescent protein (GFP)-fusion protein localizes to the cytoplasm and nucleus	2.75867	42	No
MNN9	YPL050C	Subunit of Golgi mannosyltransferase complex also containing Anp1p, Mnn10p, Mnn11p, and Hoc1p that mediates elongation of the polysaccharide mannan backbone; forms a separate complex with Van1p that is also involved in backbone elongation	2.682	43	No
YOR309C	YOR309C	Dubious open reading frame unlikely to encode a protein, based on available experimental and comparative sequence data; partially overlaps the verified gene NOP58	2.64067	44	No
DET1	YDR051C	Protein involved in the non-vesicular transport of sterols in both directions between the endoplasmic reticulum and plasma membrane; deletion confers sensitivity to nickel	2.63733	45	No
YDL163W	YDL163W	Dubious open reading frame unlikely to encode a protein, based on experimental and comparative sequence data; partially overlaps the verified gene CDC9/YDL164C encoding DNA ligase	2.607	46	No
VTC1	YER072W	Vacuolar transporter chaperon (VTC) involved in distributing V-ATPase and other membrane proteins; together with other VTC proteins, forms a heterotetrameric complex that associates with the SNARE Nyv1p and the V0 sector of the V-ATPase	2.595	47	No
UBC4	YBR082C	Ubiquitin-conjugating enzyme (E2), mediates degradation of abnormal or excess proteins, including calmodulin and histone H3; interacts with many SCF ubiquitin protein ligases; component of the cellular stress response	2.59033	48	No
UGA2	YBR006W	Succinate semialdehyde dehydrogenase involved in the utilization of gamma-aminobutyrate (GABA) as a nitrogen source; part of the 4-aminobutyrate and glutamate degradation pathways; localized to the cytoplasm	2.59033	49	No
RHO3	YIL118W	Non-essential small GTPase of the Rho/Rac subfamily of Ras-like proteins involved in the establishment of cell polarity; GTPase activity positively regulated by the GTPase activating protein (GAP) Rgd1p	2.57067	50	No
BSC2	YDR275W	Protein of unknown function, ORF exhibits genomic organization compatible with a translational readthrough-dependent mode of expression	2.55867	51	No
MRPL40	YPL173W	Mitochondrial ribosomal protein of the large subunit	2.55128	52	Yes
YBR071W	YBR071W	Putative protein of unknown function; (GFP)-fusion and epitope-tagged proteins localize to the cytoplasm; mRNA expression may be regulated by the cell cycle and/or cell wall stress	2.54033	53	No
AIM6	YDL237W	Putative protein of unknown function, required for respiratory growth; YDL237W is not an essential gene	2.531	54	No
PEF1	YGR058W	Penta-EF-hand protein required for polar bud growth and cell wall abscission; binds calcium and zinc with different affinity; localizes to bud site in G1, bud neck in G2	2.52733	55	No
ABP140	YOR239W	Nonessential protein that binds actin filaments and localizes to actin patches and cables, has similarity to S-adenosylmethionine (AdoMet)-dependent methyltransferases	2.52367	56	No
ACB1	YGR037C	Acyl-CoA-binding protein, transports newly synthesized acyl-CoA esters from fatty acid synthetase (Fas1p-Fas2p) to acyl-CoA-consuming processes	2.51667	57	No
YPR114W	YPR114W	Putative protein of unknown function	2.505	58	No
YPL080C	YPL080C	Dubious open reading frame unlikely to encode a protein, based on available experimental and comparative sequence data	2.50067	59	No
TRM1	YDR120C	tRNA methyltransferase; two forms of the protein are made by alternative translation starts; localizes to both the nucleus and mitochondrion to produce the modified base N2,N2-dimethylguanosine in tRNAs in both compartments	2.5	60	Yes
PRP11	YDL043C	Subunit of the SF3a splicing factor complex, required for spliceosome assembly	2.49767	61	Yes
UGA4	YDL210W	Permease that serves as a gamma-aminobutyrate (GABA) transport protein involved in the utilization of GABA as a nitrogen source; catalyzes the transport of putrescine and delta-aminolevulinic acid (ALA); localized to the vacuolar membrane	2.49267	62	No
YBL059W	YBL059W	Putative protein of unknown function; the authentic, non-tagged protein is detected in highly purified mitochondria in high-throughput studies	2.49033	63	No
YPT1	YFL038C	Ras-like small GTPase, involved in the ER-to-Golgi step of the secretory pathway; complex formation with the Rab escort protein Mrs6p is required for prenylation of Ypt1p by protein geranylgeranyltransferase type II (Bet2p-Bet4p)	2.48933	64	No
TPC1	YGR096W	Mitochondrial membrane transporter that mediates uptake of the essential cofactor thiamine pyrophosphate (ThPP) into mitochondria; expression appears to be regulated by carbon source; member of the mitochondrial carrier family	2.48733	65	No
APL3	YBL037W	Alpha-adaptin, large subunit of the clathrin associated protein complex (AP-2); involved in vesicle mediated transport	2.482	66	No
SCP160	YJL080C	Essential RNA-binding G protein effector of mating response pathway, mainly associated with nuclear envelope and ER, interacts in mRNA-dependent manner with translating ribosomes via multiple KH domains, similar to vertebrate vigilins	2.48018	67	Yes
PTH2	YBL057C	One of two (see also PTH1) mitochondrially-localized peptidyl-tRNA hydrolases; negatively regulates the ubiquitin-proteasome pathway via interactions with ubiquitin-like ubiquitin-associated proteins; dispensable for cell growth	2.46633	68	No
YLH47	YPR125W	Mitochondrial inner membrane protein exposed to the mitochondrial matrix, associates with mitochondrial ribosomes, NOT required for respiratory growth; homolog of human Letm1, a protein implicated in Wolf-Hirschhorn syndrome	2.46533	69	No
CWC2	YDL209C	Protein involved in pre-mRNA splicing, component of a complex containing Cef1p; interacts with Prp19p; contains an RNA recognition motif; has similarity to S. pombe Cwf2p	2.4625	70	Yes
CST26	YBR042C	Protein of unknown function, affects chromosome stability when overexpressed	2.46167	71	No
YBR100W	YBR100W	Dubious open reading frame unlikely to encode a protein, based on available experimental and comparative sequence data; completely overlaps the verified gene MMS4	2.45567	72	No
FRS2	YFL022C	Alpha subunit of cytoplasmic phenylalanyl-tRNA synthetase, forms a tetramer with Frs1p to form active enzyme; evolutionarily distant from mitochondrial phenylalanyl-tRNA synthetase based on protein sequence, but substrate binding is similar	2.451	73	Yes
SEC62	YPL094C	Essential subunit of Sec63 complex (Sec63p, Sec62p, Sec66p and Sec72p); with Sec61 complex, Kar2p/BiP and Lhs1p forms a channel competent for SRP-dependent and post-translational SRP-independent protein targeting and import into the ER	2.446	74	No
ASF2	YDL197C	Anti-silencing protein that causes derepression of silent loci when overexpressed	2.44433	75	No
CLB3	YDL155W	B-type cyclin involved in cell cycle progression; activates Cdc28p to promote the G2/M transition; may be involved in DNA replication and spindle assembly; accumulates during S phase and G2, then targeted for ubiquitin-mediated degradation	2.44433	76	No
HAS1	YMR290C	ATP-dependent RNA helicase; localizes to both the nuclear periphery and nucleolus; highly enriched in nuclear pore complex fractions; constituent of 66S pre-ribosomal particles	2.44433	77	Yes
RPA43	YOR340C	RNA polymerase I subunit A43	2.42698	78	Yes
SCO2	YBR024W	Protein anchored to the mitochondrial inner membrane, similar to Sco1p and may have a redundant function with Sco1p in delivery of copper to cytochrome c oxidase; interacts with Cox2p	2.42533	79	No
DAS2	YDR020C	Putative protein of unknown function; non-essential gene identified in a screen for mutants with increased levels of rDNA transcription; weak similarity with uridine kinases and with phosphoribokinases	2.41533	80	No
RIM1	YCR028C-A	Single-stranded DNA-binding protein essential for mitochondrial genome maintenance; involved in mitochondrial DNA replication	2.41233	81	No
YDL009C	YDL009C	Dubious open reading frame unlikely to encode a protein, based on available experimental and comparative sequence data; partially overlaps the uncharacterized ORF YDL010W; YDL009C is not an essential gene	2.38867	82	No
YLR317W	YLR317W	Dubious open reading frame; may be part of a bicistronic transcript with NKP2/YLR315W; overlaps the verified ORF TAD3/YLR316C	2.385	83	No
SMD1	YGR074W	Core Sm protein Sm D1; part of heteroheptameric complex (with Smb1p, Smd2p, Smd3p, Sme1p, Smx3p, and Smx2p) that is part of the spliceosomal U1, U2, U4, and U5 snRNPs; homolog of human Sm D1	2.38427	84	Yes
POA1	YBR022W	Phosphatase that is highly specific for ADP-ribose 1''-phosphate, a tRNA splicing metabolite; may have a role in regulation of tRNA splicing	2.384	85	No
FMO1	YHR176W	Flavin-containing monooxygenase, localized to the cytoplasmic face of the ER membrane; catalyzes oxidation of biological thiols to maintain the ER redox buffer ratio for correct folding of disulfide-bonded proteins	2.382	86	No
RPL4A	YBR031W	N-terminally acetylated protein component of the large (60S) ribosomal subunit, nearly identical to Rpl4Bp and has similarity to E. coli L4 and rat L4 ribosomal proteins	2.373	87	Yes
REG2	YBR050C	Regulatory subunit of the Glc7p type-1 protein phosphatase; involved with Reg1p, Glc7p, and Snf1p in regulation of glucose-repressible genes, also involved in glucose-induced proteolysis of maltose permease	2.37067	88	No
STP4	YDL048C	Protein containing a Kruppel-type zinc-finger domain; has similarity to Stp1p, Stp2p, and Stp3p	2.37033	89	No
DAP1	YPL170W	Heme-binding protein involved in regulation of cytochrome P450 protein Erg11p; damage response protein, related to mammalian membrane progesterone receptors; mutations lead to defects in telomeres, mitochondria, and sterol synthesis	2.36767	90	No
CNM67	YNL225C	Component of the spindle pole body outer plaque; required for spindle orientation and mitotic nuclear migration	2.36633	91	No
YCR023C	YCR023C	Vacuolar membrane protein of unknown function; member of the multidrug resistance family; YCR023C is not an essential gene	2.35633	92	No
SAS10	YDL153C	Essential subunit of U3-containing Small Subunit (SSU) processome complex involved in production of 18S rRNA and assembly of small ribosomal subunit; disrupts silencing when overproduced	2.35533	93	Yes
YBL062W	YBL062W	Dubious open reading frame unlikely to encode a protein, based on available experimental and comparative sequence data	2.35267	94	No
YDL176W	YDL176W	Protein of unknown function, predicted by computational methods to be involved in fructose-1,6-bisphosphatase (Fbp1p) degradation; interacts with components of the GID complex; YDL176W is not an essential gene	2.35133	95	No
DFM1	YDR411C	ER localized derlin-like family member involved in ER stress and homeostasis; not involved in ERAD or substrate retrotranslocation; interacts with CDC48; contains four transmembrane domains and two SHP boxes	2.34767	96	No
DED1	YOR204W	ATP-dependent DEAD (Asp-Glu-Ala-Asp)-box RNA helicase, required for translation initiation of all yeast mRNAs; mutations in human DEAD-box DBY are a frequent cause of male infertility	2.33433	97	Yes
YBL094C	YBL094C	Dubious open reading frame unlikely to encode a protein, based on available experimental and comparative sequence data; partially overlaps uncharacterized ORF YBL095W	2.32667	98	No
YDL158C	YDL158C	Dubious ORF unlikely to encode a protein, based on available experimental and comparative sequence data	2.32633	99	No
YBR090C	YBR090C	Putative protein of unknown function; green fluorescent protein (GFP)-fusion protein localizes to the cytoplasm and nucleus	2.32233	100	No
GPI18	YBR004C	Functional ortholog of human PIG-V, which is a mannosyltransferase that transfers the second mannose in glycosylphosphatidylinositol biosynthesis; the authentic, non-tagged protein was localized to mitochondria	2.316	101	No
PET112	YBL080C	Subunit of the trimeric GatFAB AmidoTransferase(AdT) complex; involved in the formation of Q-tRNAQ; mutation is functionally complemented by the bacterial GatB ortholog	2.313	102	Yes
MUM2	YBR057C	Cytoplasmic protein essential for meiotic DNA replication and sporulation; interacts with Orc2p, which is a component of the origin recognition complex	2.31133	103	No
NDE2	YDL085W	Mitochondrial external NADH dehydrogenase, catalyzes the oxidation of cytosolic NADH; Nde1p and Nde2p are involved in providing the cytosolic NADH to the mitochondrial respiratory chain	2.309	104	No
YDR179W-A	YDR179W-A	Putative protein of unknown function	2.30767	105	No
HBS1	YKR084C	GTP binding protein with sequence similarity to the elongation factor class of G proteins, EF-1alpha and Sup35p; associates with Dom34p, and shares a similar genetic relationship with genes that encode ribosomal protein components	2.30733	106	No
GRS2	YPR081C	Protein with sequence similarity to Grs1p, which is a glycyl-tRNA synthetase; cannot substitute for Grs1p; possible pseudogene that is expressed at very low levels	2.30488	107	Yes
YIL055C	YIL055C	Putative protein of unknown function	2.3	108	No
SSA3	YBL075C	ATPase involved in protein folding and the response to stress; plays a role in SRP-dependent cotranslational protein-membrane targeting and translocation; member of the heat shock protein 70 (HSP70) family; localized to the cytoplasm	2.29867	109	No
BDS1	YOL164W	Bacterially-derived sulfatase required for use of alkyl- and aryl-sulfates as sulfur sources	2.295	110	No
SNU23	YDL098C	Component of U4/U6.U5 snRNP involved in mRNA splicing via spliceosome	2.29268	111	Yes
SMM1	YNR015W	Dihydrouridine synthase, member of a family of dihydrouridine synthases including Dus1p, Smm1p, Dus3p, and Dus4p; modifies uridine residues at position 20 of cytoplasmic tRNAs	2.29167	112	Yes
YDR048C	YDR048C	Dubious ORF unlikely to encode a functional protein, based on available experimental and comparative sequence data	2.28533	113	No
SEM1	YDR363W-A	Component of the lid subcomplex of the regulatory subunit of the 26S proteasome; involved in mRNA export mediated by the TREX-2 complex (Sac3p-Thp1p); ortholog of human DSS1	2.281	114	No
TIM44	YIL022W	Essential component of the Translocase of the Inner Mitochondrial membrane (TIM23 complex); tethers the import motor and regulatory factors (PAM complex) to the translocation channel (Tim23p-Tim17p core complex)	2.28	115	No
HSP10	YOR020C	Mitochondrial matrix co-chaperonin that inhibits the ATPase activity of Hsp60p, a mitochondrial chaperonin; involved in protein folding and sorting in the mitochondria; 10 kD heat shock protein with similarity to E. coli groES	2.271	116	No
RSA4	YCR072C	WD-repeat protein involved in ribosome biogenesis; may interact with ribosomes; required for maturation and efficient intra-nuclear transport or pre-60S ribosomal subunits, localizes to the nucleolus	2.266	117	No
PYK2	YOR347C	Pyruvate kinase that appears to be modulated by phosphorylation; PYK2 transcription is repressed by glucose, and Pyk2p may be active under low glycolytic flux	2.265	118	No
HSP26	YBR072W	Small heat shock protein (sHSP) with chaperone activity; forms hollow, sphere-shaped oligomers that suppress unfolded proteins aggregation; oligomer activation requires a heat-induced conformational change; not expressed in unstressed cells	2.259	119	No
YEL1	YBL060W	Guanine nucleotide exchange factor specific for Arf3p; localized to the bud neck and tip; required for localization of Arf3p to the bud neck and tip	2.252	120	No
TFA2	YKR062W	TFIIE small subunit, involved in RNA polymerase II transcription initiation	2.248	121	No
VID24	YBR105C	Peripheral membrane protein located at Vid (vacuole import and degradation) vesicles; regulates fructose-1,6-bisphosphatase (FBPase) targeting to the vacuole; promotes proteasome-dependent catabolite degradation of FBPase	2.241	122	No
YDR029W	YDR029W	Dubious ORF unlikely to encode a protein, based on available experimental and comparative sequence data	2.24033	123	No
KSS1	YGR040W	Mitogen-activated protein kinase (MAPK) involved in signal transduction pathways that control filamentous growth and pheromone response; the KSS1 gene is nonfunctional in S288C strains and functional in W303 strains	2.23967	124	No
RPG1	YBR079C	eIF3a subunit of the core complex of translation initiation factor 3 (eIF3), essential for translation; part of a subcomplex (Prt1p-Rpg1p-Nip1p) that stimulates binding of mRNA and tRNA(i)Met to ribosomes	2.238	125	No
SCM3	YDL139C	Nonhistone component of centromeric chromatin that binds stoichiometrically to CenH3-H4 histones, required for kinetochore assembly; contains nuclear export signal (NES); required for G2/M progression and localization of Cse4p	2.236	126	No
YPR174C	YPR174C	Protein of unknown function; green fluorescent protein (GFP)-fusion protein localizes to the nuclear periphery; potential Cdc28p substrate	2.23433	127	No
NTO1	YPR031W	Subunit of the NuA3 histone acetyltransferase complex that acetylates histone H3; contains PHD finger domain that interacts with methylated histone H3	2.232	128	No
YBR096W	YBR096W	Putative protein of unknown function; green fluorescent protein (GFP)-fusion protein localizes to the ER	2.22867	129	No
YPR196W	YPR196W	Putative maltose activator	2.226	130	No
YGR011W	YGR011W	Dubious open reading frame unlikely to encode a functional protein, based on available experimental and comparative sequence data	2.2205	131	No
YKR033C	YKR033C	Dubious open reading frame unlikely to encode a protein, based on available experimental and comparative sequence data; partially overlaps the verified gene DAL80	2.21867	132	No
AIM38	YNR018W	Putative protein of unknown function; non-tagged protein is detected in purified mitochondria; null mutant is viable and displays reduced frequency of mitochondrial genome loss	2.21833	133	No
MBP1	YDL056W	Transcription factor involved in regulation of cell cycle progression from G1 to S phase, forms a complex with Swi6p that binds to MluI cell cycle box regulatory element in promoters of DNA synthesis genes	2.21733	134	No
YPL088W	YPL088W	Putative aryl alcohol dehydrogenase; transcription is activated by paralogous transcription factors Yrm1p and Yrr1p along with genes involved in multidrug resistance	2.21367	135	No
PRP4	YPR178W	Splicing factor, component of the U4/U6-U5 snRNP complex	2.20867	136	Yes
YBR063C	YBR063C	Putative protein of unknown function; YBR063C is not an essential gene	2.207	137	No
AST1	YBL069W	Peripheral membrane protein that interacts with the plasma membrane ATPase Pma1p and has a role in its targeting to the plasma membrane, possibly by influencing its incorporation into lipid rafts	2.20533	138	No
UTP22	YGR090W	Possible U3 snoRNP protein involved in maturation of pre-18S rRNA, based on computational analysis of large-scale protein-protein interaction data	2.20233	139	Yes
TIM12	YBR091C	Essential protein of the inner mitochondrial membrane, peripherally localized; component of the TIM22 complex, which is a twin-pore translocase that mediates insertion of numerous multispanning inner membrane proteins	2.202	140	No
FAL1	YDR021W	Nucleolar protein required for maturation of 18S rRNA, member of the eIF4A subfamily of DEAD-box ATP-dependent RNA helicases	2.19867	141	Yes
MIC14	YDR031W	Mitochondrial intermembrane space cysteine motif protein of 14 kDa	2.19833	142	No
SEC28	YIL076W	Epsilon-COP subunit of the coatomer; regulates retrograde Golgi-to-ER protein traffic; stabilizes Cop1p, the alpha-COP and the coatomer complex; non-essential for cell growth	2.19733	143	No
RPS15	YOL040C	Protein component of the small (40S) ribosomal subunit; has similarity to E. coli S19 and rat S15 ribosomal proteins	2.19467	144	Yes
MRP51	YPL118W	Mitochondrial ribosomal protein of the small subunit; MRP51 exhibits genetic interactions with mutations in the COX2 and COX3 mRNA 5'-untranslated leader sequences	2.19231	145	Yes
RPS13	YDR064W	Protein component of the small (40S) ribosomal subunit; has similarity to E. coli S15 and rat S13 ribosomal proteins	2.18185	146	Yes
YLR282C	YLR282C	Dubious open reading frame unlikely to encode a functional protein, based on available experimental and comparative sequence data; deletion mutation confers an increase in Ty1 transposition	2.179	147	No
LSM2	YBL026W	Lsm (Like Sm) protein; part of heteroheptameric complexes (Lsm2p-7p and either Lsm1p or 8p): cytoplasmic Lsm1p complex involved in mRNA decay; nuclear Lsm8p complex part of U6 snRNP and possibly involved in processing tRNA, snoRNA, and rRNA	2.16667	148	Yes
PCL9	YDL179W	Cyclin, forms a functional kinase complex with Pho85p cyclin-dependent kinase (Cdk), expressed in late M/early G1 phase, activated by Swi5p	2.163	149	No
YBL073W	YBL073W	Dubious open reading frame unlikely to encode a protein, based on available experimental and comparative sequence data; partially overlaps the essential gene AAR2/YBL074C	2.162	150	No
YDR056C	YDR056C	Putative protein of unknown function; green fluorescent protein (GFP)-fusion protein localizes to the endoplasmic retiuculum; YDR056C is not an essential protein	2.15967	151	No
ACK1	YDL203C	Protein that functions upstream of Pkc1p in the cell wall integrity pathway; GFP-fusion protein expression is induced in response to the DNA-damaging agent MMS; non-tagged Ack1p is detected in purified mitochondria	2.15933	152	No
MTF2	YDL044C	Mitochondrial matrix protein that interacts with an N-terminal region of mitochondrial RNA polymerase (Rpo41p) and couples RNA processing and translation to transcription	2.15789	153	Yes
CDC53	YDL132W	Cullin, structural protein of SCF complexes (which also contain Skp1p, Cdc34p, Hrt1p and an F-box protein) involved in ubiquitination; SCF promotes the G1-S transition by targeting G1 cyclins and the Cln-CDK inhibitor Sic1p for degradation	2.15567	154	No
PHR1	YOR386W	DNA photolyase involved in photoreactivation, repairs pyrimidine dimers in the presence of visible light; induced by DNA damage; regulated by transcriptional repressor Rph1p	2.15367	155	No
STE3	YKL178C	Receptor for a factor pheromone, transcribed in alpha cells and required for mating by alpha cells, couples to MAP kinase cascade to mediate pheromone response; ligand bound receptors are endocytosed and recycled to the plasma membrane; GPC	2.15133	156	No
LCB1	YMR296C	Component of serine palmitoyltransferase, responsible along with Lcb2p for the first committed step in sphingolipid synthesis, which is the condensation of serine with palmitoyl-CoA to form 3-ketosphinganine	2.15	157	No
LEE1	YPL054W	Zinc-finger protein of unknown function	2.14733	158	No
BUD5	YCR038C	GTP/GDP exchange factor for Rsr1p (Bud1p) required for both axial and bipolar budding patterns; mutants exhibit random budding in all cell types	2.13933	159	No
ELC1	YPL046C	Elongin C, involved in transcription elongation as a heterodimer with Ela1p; required for ubiquitin-dependent degradation of Rpo21p; plays a role in global genomic nucleotide excision repair; expression highly upregulated during sporulation	2.13442	160	Yes
YDR042C	YDR042C	Putative protein of unknown function; expression is increased in ssu72-ts69 mutant	2.132	161	No
NCL1	YBL024W	S-adenosyl-L-methionine-dependent tRNA: m5C-methyltransferase, methylates cytosine to m5C at several positions in tRNAs and intron-containing pre-tRNAs; similar to Nop2p and human proliferation associated nucleolar protein p120	2.13158	162	Yes
SUA7	YPR086W	Transcription factor TFIIB, a general transcription factor required for transcription initiation and start site selection by RNA polymerase II	2.12967	163	No
WHI4	YDL224C	Putative RNA binding protein and partially redundant Whi3p homolog that regulates the cell size requirement for passage through Start and commitment to cell division	2.12333	164	Yes
RPL27B	YDR471W	Protein component of the large (60S) ribosomal subunit, nearly identical to Rpl27Ap and has similarity to rat L27 ribosomal protein	2.12195	165	Yes
MAM3	YOL060C	Protein required for normal mitochondrial morphology, has similarity to hemolysins	2.119	166	No
NOB1	YOR056C	Essential nuclear protein involved in proteasome maturation and synthesis of 40S ribosomal subunits; required for cleavage of the 20S pre-rRNA to generate the mature 18S rRNA	2.113	167	Yes
APL4	YPR029C	Gamma-adaptin, large subunit of the clathrin-associated protein (AP-1) complex; binds clathrin; involved in vesicle mediated transport	2.11133	168	No
YOR055W	YOR055W	Dubious open reading frame unlikely to encode a functional protein, based on available experimental and comparative sequence data	2.10567	169	No
CBC2	YPL178W	Small subunit of the heterodimeric cap binding complex that also contains Sto1p, component of the spliceosomal commitment complex; interacts with Npl3p, possibly to package mRNA for export from the nucleus; contains an RNA-binding motif	2.10526	170	Yes
PDE1	YGL248W	Low-affinity cyclic AMP phosphodiesterase, controls glucose and intracellular acidification-induced cAMP signaling, target of the cAMP-protein kinase A (PKA) pathway; glucose induces transcription and inhibits translation	2.102	171	No
MTC3	YGL226W	Protein of unknown function; green fluorescent protein (GFP)-fusion protein localizes to the mitochondrion; mtc3 is synthetically sick with cdc13-1	2.1	172	No
PRP6	YBR055C	Splicing factor, component of the U4/U6-U5 snRNP complex	2.09933	173	Yes
YDR026C	YDR026C	Protein of unknown function that may interact with ribosomes, based on co-purification experiments; Myb-like DNA-binding protein that may bind to the Ter region of rDNA; interacts physically with Fob1p	2.098	174	No
GLE1	YDL207W	Cytoplasmic nucleoporin required for polyadenylated RNA export but not for protein import; component of Nup82p nuclear pore subcomplex; contains a nuclear export signal	2.08967	175	Yes
PRX1	YBL064C	Mitochondrial peroxiredoxin (1-Cys Prx) with thioredoxin peroxidase activity, has a role in reduction of hydroperoxides; reactivation requires Trr2p and glutathione; induced during respiratory growth and oxidative stress; phosphorylated	2.08867	176	No
UBC5	YDR059C	Ubiquitin-conjugating enzyme that mediates selective degradation of short-lived, abnormal, or excess proteins, including histone H3; central component of the cellular stress response; expression is heat inducible	2.08767	177	No
RSM10	YDR041W	Mitochondrial ribosomal protein of the small subunit, has similarity to E. coli S10 ribosomal protein; essential for viability, unlike most other mitoribosomal proteins	2.0875	178	Yes
YPR098C	YPR098C	Protein of unknown function, localized to the mitochondrial outer membrane	2.08533	179	No
OAZ1	YPL052W	Regulator of ornithine decarboxylase (Spe1p), antizyme that binds to Spe1p to regulate ubiquitin-independent degradation; ribosomal frameshifting during synthesis of Oaz1p and its ubiquitin-mediated degradation are both polyamine-regulated	2.08333	180	No
YDL196W	YDL196W	Dubious open reading frame unlikely to encode a protein, based on available experimental and comparative sequence data; open reading frame is located in promoter region of essential gene SEC31	2.08333	181	No
UTP7	YER082C	Nucleolar protein, component of the small subunit (SSU) processome containing the U3 snoRNA that is involved in processing of pre-18S rRNA	2.08167	182	No
RPL35A	YDL191W	Protein component of the large (60S) ribosomal subunit, identical to Rpl35Bp and has similarity to rat L35 ribosomal protein	2.07726	183	Yes
SNT309	YPR101W	Component of NineTeen complex (NTC) containing Prp19p involved in mRNA splicing, interacts physically and genetically with Prp19p	2.07692	184	Yes
YDR061W	YDR061W	Protein with similarity to ATP-binding cassette (ABC) transporter family members; lacks predicted membrane-spanning regions; transcriptionally activated by Yrm1p along with genes involved in multidrug resistance	2.07	185	No
RFS1	YBR052C	Protein of unknown function; member of a flavodoxin-like fold protein family that includes Pst2p and Ycp4p; green fluorescent protein (GFP)-fusion protein localizes to the cytoplasm in a punctate pattern	2.06933	186	No
ANT1	YPR128C	Peroxisomal adenine nucleotide transporter; involved in beta-oxidation of medium-chain fatty acid; required for peroxisome proliferation	2.06633	187	No
ECM13	YBL043W	Non-essential protein of unknown function; induced by treatment with 8-methoxypsoralen and UVA irradiation	2.06567	188	No
YDL129W	YDL129W	Putative protein of unknown function; green fluorescent protein (GFP)-fusion protein localizes to the cytoplasm and the nucleus; YDL129W is not an essential gene	2.06333	189	No
YKL118W	YKL118W	Dubious open reading frame, unlikely to encode a protein; partially overlaps the verified gene VPH2	2.063	190	No
NTC20	YBR188C	Member of a complex, including Prp19p, that binds to the spliceosome; required for pre-mRNA splicing	2.05967	191	Yes
YDR018C	YDR018C	Probable membrane protein with three predicted transmembrane domains; homologous to Ybr042cp, similar to C. elegans F55A11.5 and maize 1-acyl-glycerol-3-phosphate acyltransferase	2.057	192	No
RTS2	YOR077W	Basic zinc-finger protein, similar to human and mouse Kin17 proteins which are chromatin-associated proteins involved in UV response and DNA replication	2.05633	193	No
MTR3	YGR158C	Exosome non-catalytic core component; involved in 3'-5' RNA processing and degradation in both the nucleus and the cytoplasm; has similarity to E. coli RNase PH and to human hMtr3p (EXOSC6)	2.05133	194	Yes
RPA34	YJL148W	RNA polymerase I subunit A34.5	2.051	195	No
HEM12	YDR047W	Uroporphyrinogen decarboxylase, catalyzes the fifth step in the heme biosynthetic pathway; localizes to both the cytoplasm and nucleus; a hem12 mutant has phenotypes similar to patients with porphyria cutanea tarda	2.04867	196	No
PRP24	YMR268C	Splicing factor that reanneals U4 and U6 snRNPs during spliceosome recycling	2.04816	197	Yes
COQ1	YBR003W	Hexaprenyl pyrophosphate synthetase, catalyzes the first step in ubiquinone (coenzyme Q) biosynthesis	2.048	198	No
MTR2	YKL186C	mRNA transport regulator, essential nuclear protein; Mex67p and Mtr2p form a mRNA export complex which binds to RNA	2.04605	199	Yes
PTR2	YKR093W	Integral membrane peptide transporter, mediates transport of di- and tri-peptides; conserved protein that contains 12 transmembrane domains; PTR2 expression is regulated by the N-end rule pathway via repression by Cup9p	2.04333	200	No
ATG8	YBL078C	Component of autophagosomes and Cvt vesicles; undergoes conjugation to phosphatidylethanolamine (PE); Atg8p-PE is anchored to membranes, is involved in phagophore expansion, and may mediate membrane fusion during autophagosome formation	2.04333	201	No
CTF19	YPL018W	Outer kinetochore protein, required for accurate mitotic chromosome segregation; component of the kinetochore sub-complex COMA (Ctf19p, Okp1p, Mcm21p, Ame1p) that functions as a platform for kinetochore assembly	2.04333	202	No
ELO1	YJL196C	Elongase I, medium-chain acyl elongase, catalyzes carboxy-terminal elongation of unsaturated C12-C16 fatty acyl-CoAs to C16-C18 fatty acids	2.04267	203	No
OST3	YOR085W	Gamma subunit of the oligosaccharyltransferase complex of the ER lumen, which catalyzes asparagine-linked glycosylation of newly synthesized proteins; Ost3p is important for N-glycosylation of a subset of proteins	2.039	204	No
RRI1	YDL216C	Catalytic subunit of the COP9 signalosome (CSN) complex that acts as an isopeptidase in cleaving the ubiquitin-like protein Nedd8 from SCF ubiquitin ligases; metalloendopeptidase involved in the adaptation to pheromone signaling	2.039	205	No
HHT1	YBR010W	Histone H3, core histone protein required for chromatin assembly, part of heterochromatin-mediated telomeric and HM silencing; one of two identical histone H3 proteins (see HHT2); regulated by acetylation, methylation, and phosphorylation	2.039	206	No
RTC6	YPL183W-A	Homolog of the prokaryotic ribosomal protein L36, likely to be a mitochondrial ribosomal protein coded in the nuclear genome; null mutation suppresses cdc13-1 temperature sensitivity	2.038	207	No
PFK2	YMR205C	Beta subunit of heterooctameric phosphofructokinase involved in glycolysis, indispensable for anaerobic growth, activated by fructose-2,6-bisphosphate and AMP, mutation inhibits glucose induction of cell cycle-related genes	2.03767	208	No
YLR255C	YLR255C	Dubious ORF unlikely to encode a functional protein, based on available experimental and comparative sequence data	2.0315	209	No
HRP1	YOL123W	Subunit of cleavage factor I, a five-subunit complex required for the cleavage and polyadenylation of pre-mRNA 3' ends; RRM-containing heteronuclear RNA binding protein and hnRNPA/B family member that binds to poly (A) signal sequences	2.02167	210	Yes
NUP84	YDL116W	Subunit of the nuclear pore complex (NPC), forms a subcomplex with Nup85p, Nup120p, Nup145p-C, Sec13p, and Seh1p that plays a role in nuclear mRNA export and NPC biogenesis	2.01733	211	No
YBR027C	YBR027C	Dubious open reading frame unlikely to encode a protein, based on available experimental and comparative sequence data	2.01433	212	No
AAD4	YDL243C	Putative aryl-alcohol dehydrogenase with similarity to P. chrysosporium aryl-alcohol dehydrogenase, involved in the oxidative stress response; expression induced in cells treated with the mycotoxin patulin	2.012	213	No
EDS1	YBR033W	Putative zinc cluster protein; YBR033W is not an essential gene	2.01167	214	No
CIN2	YPL241C	GTPase-activating protein (GAP) for Cin4p; tubulin folding factor C involved in beta-tubulin (Tub2p) folding; mutants display increased chromosome loss and benomyl sensitivity; deletion complemented by human GAP, retinitis pigmentosa 2	2.01133	215	No
RRT1	YBL048W	Identified in a screen for mutants with increased levels of rDNA transcription; dubious open reading frame unlikely to encode a protein, based on experimental and comparative sequence data	2.00767	216	No
CIS1	YDR022C	Autophagy-specific protein required for autophagosome formation; may form a complex with Atg17p and Atg29p that localizes other proteins to the pre-autophagosomal structure; high-copy suppressor of CIK1 deletion	2.00733	217	No
SRO7	YPR032W	Effector of Rab GTPase Sec4p, forms a complex with Sec4p and t-SNARE Sec9p; involved in exocytosis and docking and fusion of post-Golgi vesicles with plasma membrane; homolog of Sro77p and Drosophila lgl tumor suppressor	2.007	218	No
RPT2	YDL007W	One of six ATPases of the 19S regulatory particle of the 26S proteasome involved in the degradation of ubiquitinated substrates; required for normal peptide hydrolysis by the core 20S particle	2.005	219	No
MCR1	YKL150W	Mitochondrial NADH-cytochrome b5 reductase, involved in ergosterol biosynthesis	2.005	220	No
YBL100C	YBL100C	Dubious open reading frame unlikely to encode a protein, based on available experimental and comparative sequence data; almost completely overlaps the 5' end of ATP1	2.00133	221	No
YBR099C	YBR099C	Dubious open reading frame unlikely to encode a protein, based on available experimental and comparative sequence data; completely overlaps the verified gene MMS4	1.99967	222	No
TUB4	YLR212C	Gamma-tubulin, involved in nucleating microtubules from both the cytoplasmic and nuclear faces of the spindle pole body	1.99067	223	No
CSM4	YPL200W	Protein required for accurate chromosome segregation during meiosis; involved in meiotic telomere clustering (bouquet formation) and telomere-led rapid prophase movements	1.989	224	No
YGL109W	YGL109W	Dubious open reading frame unlikely to encode a protein, based on available experimental and comparative sequence data; overlaps the uncharacterized gene YGL108C	1.989	225	No
YJL064W	YJL064W	Dubious open reading frame unlikely to encode a protein, based on available experimental and comparative sequence data; completely overlaps the verified gene YJL065C/DLS1	1.98733	226	No
CDC20	YGL116W	Cell-cycle regulated activator of anaphase-promoting complex/cyclosome (APC/C), which is required for metaphase/anaphase transition; directs ubiquitination of mitotic cyclins, Pds1p, and other anaphase inhibitors; potential Cdc28p substrate	1.98467	227	No
YDR008C	YDR008C	Dubious open reading frame unlikely to encode a protein, based on available experimental and comparative sequence data	1.98367	228	No
DBF20	YPR111W	Ser/Thr kinase involved in late nuclear division, one of the mitotic exit network (MEN) proteins; necessary for the execution of cytokinesis	1.98333	229	No
AIR2	YDL175C	Zinc knuckle protein, involved in nuclear RNA processing and degredation as a component of the TRAMP complex; stimulates the poly(A) polymerase activity of Pap2p in vitro; functionally redundant with Air1p	1.983	230	No
NAM8	YHR086W	RNA binding protein, component of the U1 snRNP protein; mutants are defective in meiotic recombination and in formation of viable spores, involved in the formation of DSBs through meiosis-specific splicing of MER2 pre-mRNA	1.97591	231	Yes
BNA4	YBL098W	Kynurenine 3-mono oxygenase, required for the de novo biosynthesis of NAD from tryptophan via kynurenine; expression regulated by Hst1p; putative therapeutic target for Huntington disease	1.97567	232	No
ARF2	YDL137W	ADP-ribosylation factor, GTPase of the Ras superfamily involved in regulation of coated formation vesicles in intracellular trafficking within the Golgi; functionally interchangeable with Arf1p	1.974	233	No
RRP42	YDL111C	Exosome non-catalytic core component; involved in 3'-5' RNA processing and degradation in both the nucleus and the cytoplasm; has similarity to E. coli RNase PH and to human hRrp42p (EXOSC7)	1.96341	234	Yes
MTD1	YKR080W	NAD-dependent 5,10-methylenetetrahydrafolate dehydrogenase, plays a catalytic role in oxidation of cytoplasmic one-carbon units; expression is regulated by Bas1p and Bas2p, repressed by adenine, and may be induced by inositol and choline	1.958	235	No
PRP22	YER013W	DEAH-box RNA-dependent ATPase/ATP-dependent RNA helicase, associates with lariat intermediates before the second catalytic step of splicing; mediates ATP-dependent mRNA release from the spliceosome and unwinds RNA duplexes	1.95621	236	Yes
BRN1	YBL097W	Subunit of the condensin complex; required for chromosome condensation and for clustering of tRNA genes at the nucleolus; may influence multiple aspects of chromosome transmission	1.95367	237	No
GAL10	YBR019C	UDP-glucose-4-epimerase, catalyzes the interconversion of UDP-galactose and UDP-D-glucose in galactose metabolism; also catalyzes the conversion of alpha-D-glucose or alpha-D-galactose to their beta-anomers	1.95333	238	No
PRM7	YDL039C	Pheromone-regulated protein, predicted to have one transmembrane segment; promoter contains Gcn4p binding elements	1.953	239	No
ADH7	YCR105W	NADPH-dependent medium chain alcohol dehydrogenase with broad substrate specificity; member of the cinnamyl family of alcohol dehydrogenases; may be involved in fusel alcohol synthesis or in aldehyde tolerance	1.953	240	No
BCY1	YIL033C	Regulatory subunit of the cyclic AMP-dependent protein kinase (PKA), a component of a signaling pathway that controls a variety of cellular processes, including metabolism, cell cycle, stress response, stationary phase, and sporulation	1.951	241	No
SNA4	YDL123W	Protein of unknown function, localized to the vacuolar outer membrane; predicted to be palmitoylated	1.95	242	No
RPN9	YDR427W	Non-ATPase regulatory subunit of the 26S proteasome, has similarity to putative proteasomal subunits in other species; null mutant is temperature sensitive and exhibits cell cycle and proteasome assembly defects	1.94733	243	No
YDR053W	YDR053W	Putative protein of unknown function; open reading frame overlaps 5' end of essential DBF4 gene encoding the regulatory subunit of the Cdc7p-Dbf4p kinase complex	1.94667	244	No
SSE2	YBR169C	Member of the heat shock protein 70 (HSP70) family; may be involved in protein folding; localized to the cytoplasm; highly homologous to the heat shock protein Sse1p	1.94533	245	No
KAR4	YCL055W	Transcription factor required for gene regulation in repsonse to pheromones; also required during meiosis; exists in two forms, a slower-migrating form more abundant during vegetative growth and a faster-migrating form induced by pheromone	1.94433	246	No
YPR177C	YPR177C	Dubious open reading frame unlikely to encode a protein, based on available experimental and comparative sequence data; partially overlaps the 5' end of the essential PRP4 gene encoding a component of the U4/U6-U5 snRNP complex	1.94167	247	No
YDL228C	YDL228C	Dubious open reading frame unlikely to encode a protein, based on available experimental and comparative sequence data; almost completely overlaps the verified gene SSB1	1.94133	248	No
YIL029C	YIL029C	Putative protein of unknown function; deletion confers sensitivity to 4-(N-(S-glutathionylacetyl)amino) phenylarsenoxide (GSAO)	1.94133	249	No
SMA1	YPL027W	Protein of unknown function involved in the assembly of the prospore membrane during sporulation; interacts with Spo14p	1.93967	250	No
ARO3	YDR035W	3-deoxy-D-arabino-heptulosonate-7-phosphate (DAHP) synthase, catalyzes the first step in aromatic amino acid biosynthesis and is feedback-inhibited by phenylalanine or high concentration of tyrosine or tryptophan	1.939	251	No
CRD1	YDL142C	Cardiolipin synthase; produces cardiolipin, which is a phospholipid of the mitochondrial inner membrane that is required for normal mitochondrial membrane potential and function; also required for normal vacuolar ion homeostasis	1.939	252	No
YPR126C	YPR126C	Dubious open reading frame unlikely to encode a functional protein, based on available experimental and comparative sequence data	1.93633	253	No
YCR041W	YCR041W	Dubious open reading frame unlikely to encode a protein, based on available experimental and comparative sequence data	1.93567	254	No
YCL056C	YCL056C	Protein of unknown function; green fluorescent protein (GFP)-fusion protein localizes to the cytoplasm in a punctate pattern; null mutant displays decreased thermotolerance	1.92833	255	No
MRPL17	YNL252C	Mitochondrial ribosomal protein of the large subunit	1.927	256	Yes
NTH2	YBR001C	Putative neutral trehalase, required for thermotolerance and may mediate resistance to other cellular stresses	1.92633	257	No
SRP14	YDL092W	Signal recognition particle (SRP) subunit, interacts with the RNA component of SRP to form the Alu domain, which is the region of SRP responsible for arrest of nascent chain elongation during membrane targeting; homolog of mammalian SRP14	1.92176	258	Yes
RDS3	YPR094W	Component of the SF3b subcomplex of the U2 snRNP, zinc cluster protein involved in pre-mRNA splicing and cycloheximide resistance	1.921	259	Yes
NOP53	YPL146C	Nucleolar protein; involved in biogenesis of the 60S subunit of the ribosome; interacts with rRNA processing factors Cbf5p and Nop2p; null mutant is viable but growth is severely impaired	1.91967	260	Yes
ARF1	YDL192W	ADP-ribosylation factor, GTPase of the Ras superfamily involved in regulation of coated vesicle formation in intracellular trafficking within the Golgi; functionally interchangeable with Arf2p	1.91933	261	No
YCR102W-A	YCR102W-A	Dubious open reading frame unlikely to encode a protein, based on available experimental and comparative sequence data	1.91833	262	No
NMT1	YLR195C	N-myristoyl transferase, catalyzes the cotranslational, covalent attachment of myristic acid to the N-terminal glycine residue of several proteins involved in cellular growth and signal transduction	1.918	263	No
YTM1	YOR272W	Constituent of 66S pre-ribosomal particles, forms a complex with Nop7p and Erb1p that is required for maturation of the large ribosomal subunit; has seven C-terminal WD repeats	1.91667	264	Yes
TOS2	YGR221C	Protein involved in localization of Cdc24p to the site of bud growth; may act as a membrane anchor; localizes to the bud neck and bud tip; potentially phosphorylated by Cdc28p	1.91633	265	No
GRX7	YBR014C	Cis-golgi localized monothiol glutaredoxin; more similar in activity to dithiol than other monothiol glutaredoxins; involved in the oxidative stress response; does not bind metal ions; functional overlap with GRX6	1.91567	266	No
YPR136C	YPR136C	Dubious open reading frame unlikely to encode a protein, based on available experimental and comparative sequence data; partially overlaps verified ORF RRP9	1.91533	267	No
SES1	YDR023W	Cytosolic seryl-tRNA synthetase, class II aminoacyl-tRNA synthetase that aminoacylates tRNA(Ser), displays tRNA-dependent amino acid recognition which enhances discrimination of the serine substrate, interacts with peroxin Pex21p	1.9125	268	Yes
ATG5	YPL149W	Conserved protein involved in autophagy and the Cvt pathway; undergoes conjugation with Atg12p to form a complex involved in Atg8p lipidation; conjugated Atg12p also forms a complex with Atg16p that is essential for autophagosome formation	1.91167	269	No
RDI1	YDL135C	Rho GDP dissociation inhibitor involved in the localization and regulation of Cdc42p	1.909	270	No
EKI1	YDR147W	Ethanolamine kinase, primarily responsible for phosphatidylethanolamine synthesis via the CDP-ethanolamine pathway; exhibits some choline kinase activity, thus contributing to phosphatidylcholine synthesis via the CDP-choline pathway	1.90767	271	No
VPS51	YKR020W	Component of the GARP (Golgi-associated retrograde protein) complex, Vps51p-Vps52p-Vps53p-Vps54p, which is required for the recycling of proteins from endosomes to the late Golgi; links the (VFT/GARP) complex to the SNARE Tlg1p	1.907	272	No
ATP3	YBR039W	Gamma subunit of the F1 sector of mitochondrial F1F0 ATP synthase, which is a large, evolutionarily conserved enzyme complex required for ATP synthesis	1.90667	273	No
DNL4	YOR005C	DNA ligase required for nonhomologous end-joining (NHEJ), forms stable heterodimer with required cofactor Lif1p, interacts with Nej1p; involved in meiosis, not essential for vegetative growth	1.90633	274	No
YGR038C-A	YGR038C-A	Retrotransposon TYA Gag gene co-transcribed with TYB Pol; translated as TYA or TYA-TYB polyprotein; Gag is a nucleocapsid protein that is the structural constituent of virus-like particles (VLPs); similar to retroviral Gag	1.90567	275	Yes
YML045W-A	YML045W-A	Retrotransposon TYA Gag gene co-transcribed with TYB Pol; translated as TYA or TYA-TYB polyprotein; Gag is a nucleocapsid protein that is the structural constituent of virus-like particles (VLPs); similar to retroviral Gag	1.90267	276	Yes
DLD1	YDL174C	D-lactate dehydrogenase, oxidizes D-lactate to pyruvate, transcription is heme-dependent, repressed by glucose, and derepressed in ethanol or lactate; located in the mitochondrial inner membrane	1.90233	277	No
AGE2	YIL044C	ADP-ribosylation factor (ARF) GTPase activating protein (GAP) effector, involved in Trans-Golgi-Network (TGN) transport; contains C2C2H2 cysteine/histidine motif	1.89933	278	No
TPI1	YDR050C	Triose phosphate isomerase, abundant glycolytic enzyme; mRNA half-life is regulated by iron availability; transcription is controlled by activators Reb1p, Gcr1p, and Rap1p through binding sites in the 5' non-coding region	1.899	279	No
RPS11A	YDR025W	Protein component of the small (40S) ribosomal subunit; identical to Rps11Bp and has similarity to E. coli S17 and rat S11 ribosomal proteins	1.89744	280	Yes
SIF2	YBR103W	WD40 repeat-containing subunit of the Set3C histone deacetylase complex, which represses early/middle sporulation genes; antagonizes telomeric silencing; binds specifically to the Sir4p N-terminus	1.89733	281	No
YDL109C	YDL109C	Putative lipase; involved in lipid metabolism; YDL109C is not an essential gene	1.89667	282	No
YIL077C	YIL077C	Putative protein of unknown function; the authentic, non-tagged protein is detected in highly purified mitochondria in high-throughput studies; deletion confers sensitivity to 4-(N-(S-glutathionylacetyl)amino) phenylarsenoxide (GSAO)	1.89467	283	No
RSC6	YCR052W	Component of the RSC chromatin remodeling complex; essential for mitotic growth; homolog of SWI/SNF subunit Swp73p	1.894	284	No
SLM3	YDL033C	tRNA-specific 2-thiouridylase, responsible for 2-thiolation of the wobble base of mitochondrial tRNAs; human ortholog is implicated in myoclonus epilepsy associated with ragged red fibers (MERRF)	1.892	285	Yes
MET31	YPL038W	Zinc-finger DNA-binding protein, involved in transcriptional regulation of the methionine biosynthetic genes, similar to Met32p	1.891	286	No
BLM10	YFL007W	Proteasome activator subunit; found in association with core particles, with and without the 19S regulatory particle; required for resistance to bleomycin, may be involved in protecting against oxidative damage; similar to mammalian PA200	1.88833	287	No
SEC18	YBR080C	ATPase required for the release of Sec17p during the 'priming' step in homotypic vacuole fusion and for ER to Golgi transport; homolog of the mammalian NSF	1.887	288	No
YJR120W	YJR120W	Protein of unknown function; essential for growth under anaerobic conditions; mutation causes decreased expression of ATP2, impaired respiration, defective sterol uptake, and altered levels/localization of ABC transporters Aus1p and Pdr11p	1.884	289	No
PIS1	YPR113W	Phosphatidylinositol synthase, required for biosynthesis of phosphatidylinositol, which is a precursor for polyphosphoinositides, sphingolipids, and glycolipid anchors for some of the plasma membrane proteins	1.88233	290	No
CSG2	YBR036C	Endoplasmic reticulum membrane protein, required for mannosylation of inositolphosphorylceramide and for growth at high calcium concentrations	1.88133	291	No
MUP1	YGR055W	High affinity methionine permease, integral membrane protein with 13 putative membrane-spanning regions; also involved in cysteine uptake	1.88	292	No
CBR1	YIL043C	Microsomal cytochrome b reductase, not essential for viability; also detected in mitochondria; mutation in conserved NADH binding domain of the human ortholog results in type I methemoglobinemia	1.87767	293	No
YPT32	YGL210W	GTPase of the Ypt/Rab family, very similar to Ypt31p; involved in the exocytic pathway; mediates intra-Golgi traffic or the budding of post-Golgi vesicles from the trans-Golgi	1.87767	294	No
PHO12	YHR215W	One of three repressible acid phosphatases, a glycoprotein that is transported to the cell surface by the secretory pathway; nearly identical to Pho11p; upregulated by phosphate starvation	1.87433	295	No
RTG3	YBL103C	Basic helix-loop-helix-leucine zipper (bHLH/Zip) transcription factor that forms a complex with another bHLH/Zip protein, Rtg1p, to activate the retrograde (RTG) and TOR pathways	1.873	296	No
YCR101C	YCR101C	Putative protein of unknown function; localizes to the membrane fraction; YCR101C is not an essential gene	1.87233	297	No
VPS66	YPR139C	Cytoplasmic protein of unknown function involved in vacuolar protein sorting.	1.87233	298	No
YDL011C	YDL011C	Dubious open reading frame unlikely to encode a protein, based on available experimental and comparative sequence data; overlaps the uncharacterized ORF YDL010W	1.872	299	No
SCT1	YBL011W	Glycerol 3-phosphate/dihydroxyacetone phosphate dual substrate-specific sn-1 acyltransferase of the glycerolipid biosynthesis pathway, prefers 16-carbon fatty acids, similar to Gpt2p, gene is constitutively transcribed	1.86967	300	No
HMRA2	YCR096C	Silenced copy of a2 at HMR; similarity to Alpha2p; required along with a1p for inhibiting expression of the HO endonuclease in a/alpha HO/HO diploid cells with an active mating-type interconversion system	1.86867	301	No
RPS29B	YDL061C	Protein component of the small (40S) ribosomal subunit; nearly identical to Rps29Ap and has similarity to rat S29 and E. coli S14 ribosomal proteins	1.86842	302	Yes
SEC22	YLR268W	R-SNARE protein; assembles into SNARE complex with Bet1p, Bos1p and Sed5p; cycles between the ER and Golgi complex; involved in anterograde and retrograde transport between the ER and Golgi; synaptobrevin homolog	1.86833	303	No
ICY2	YPL250C	Protein of unknown function; mobilized into polysomes upon a shift from a fermentable to nonfermentable carbon source; potential Cdc28p substrate	1.86733	304	No
SHS1	YDL225W	One of five related septins (Cdc3p, Cdc10p, Cdc11p, Cdc12p, Shs1p) that form a cortical filamentous collar at the mother-bud neck which is necessary for normal morphogenesis and cytokinesis	1.866	305	No
RXT3	YDL076C	Subunit of the RPD3L complex; involved in histone deacetylation	1.86533	306	No
YDL152W	YDL152W	Dubious open reading frame unlikely to encode a protein, based on available experimental and comparative sequence data; partially overlaps the verified ORF SAS10/YDL153C, a component of the small ribosomal subunit processosome	1.864	307	No
MDY2	YOL111C	Protein required for efficient mating; involved in shmoo formation and nuclear migration in the pre-zygote; associates with ribosomes and interacts with YOR164C; contains a ubiquitin-like (UBL) domain	1.864	308	No
MOH1	YBL049W	Protein of unknown function, has homology to kinase Snf7p; not required for growth on nonfermentable carbon sources; essential for viability in stationary phase	1.853	309	No
BUD27	YFL023W	Protein involved in bud-site selection, nutrient signaling, and gene expression controlled by TOR kinase; diploid mutants show a random budding pattern rather than the wild-type bipolar pattern; plays a role in regulating Ty1 transposition	1.8525	310	No
ALB1	YJL122W	Shuttling pre-60S factor; involved in the biogenesis of ribosomal large subunit; interacts directly with Arx1p; responsible for Tif6p recycling defects in absence of Rei1p	1.85233	311	No
SLC1	YDL052C	1-acyl-sn-gylcerol-3-phosphate acyltransferase, catalyzes the acylation of lysophosphatidic acid to form phosphatidic acid, a key intermediate in lipid metabolism; enzymatic activity detected in lipid particles and microsomes	1.851	312	No
HIS4	YCL030C	Multifunctional enzyme containing phosphoribosyl-ATP pyrophosphatase, phosphoribosyl-AMP cyclohydrolase, and histidinol dehydrogenase activities; catalyzes the second, third, ninth and tenth steps in histidine biosynthesis	1.85067	313	No
TDP1	YBR223C	Tyrosyl-DNA Phosphodiesterase I, hydrolyzes 3' and 5'-phosphotyrosyl bonds, involved in the repair of DNA lesions created by topoisomerase I and topoisomerase II; mutations in human homolog result in the neurodegenerative disease SCANI	1.84933	314	No
RPB3	YIL021W	RNA polymerase II third largest subunit B44, part of central core; similar to prokaryotic alpha subunit	1.846	315	No
YGL114W	YGL114W	Putative protein of unknown function; predicted member of the oligopeptide transporter (OPT) family of membrane transporters	1.846	316	No
RSC2	YLR357W	Component of the RSC chromatin remodeling complex; required for expression of mid-late sporulation-specific genes; involved in telomere maintenance	1.846	317	No
YDL025C	YDL025C	Putative protein kinase, potentially phosphorylated by Cdc28p; YDL025C is not an essential gene	1.846	318	No
SOL2	YCR073W-A	Protein with a possible role in tRNA export; shows similarity to 6-phosphogluconolactonase non-catalytic domains but does not exhibit this enzymatic activity; homologous to Sol1p, Sol3p, and Sol4p	1.84467	319	No
OST5	YGL226C-A	Zeta subunit of the oligosaccharyltransferase complex of the ER lumen, which catalyzes asparagine-linked glycosylation of newly synthesized proteins	1.842	320	No
MSH1	YHR120W	DNA-binding protein of the mitochondria involved in repair of mitochondrial DNA, has ATPase activity and binds to DNA mismatches; has homology to E. coli MutS; transcription is induced during meiosis	1.84133	321	No
NHP10	YDL002C	Protein related to mammalian high mobility group proteins; likely component of the INO80 complex, which is an ATP-dependent chromatin-remodeling complex	1.83967	322	No
VEL1	YGL258W	Protein of unknown function; highly induced in zinc-depleted conditions and has increased expression in NAP1 deletion mutants	1.83833	323	No
MCH5	YOR306C	Plasma membrane riboflavin transporter; facilitates the uptake of vitamin B2; required for FAD-dependent processes; sequence similarity to mammalian monocarboxylate permeases, however mutants are not deficient in monocarboxylate transport	1.83667	324	No
ROX3	YBL093C	Subunit of the RNA polymerase II mediator complex; associates with core polymerase subunits to form the RNA polymerase II holoenzyme	1.83633	325	No
SUB1	YMR039C	Transcriptional coactivator, facilitates elongation through factors that modify RNAP II; role in peroxide resistance involving Rad2p; role in the hyperosmotic stress response through polymerase recruitment at RNAP II and RNAP III genes	1.83533	326	No
PAU22	YPL282C	Putative protein of unknown function	1.832	327	No
BRE4	YDL231C	Zinc finger protein containing five transmembrane domains; null mutant exhibits strongly fragmented vacuoles and sensitivity to brefeldin A, a drug which is known to affect intracellular transport	1.83067	328	No
IPI3	YNL182C	Essential component of the Rix1 complex (Rix1p, Ipi1p, Ipi3p) that is required for processing of ITS2 sequences from 35S pre-rRNA; highly conserved and contains WD40 motifs; Rix1 complex associates with Mdn1p in pre-60S ribosomal particles	1.83	329	No
TSR1	YDL060W	Protein required for processing of 20S pre-rRNA in the cytoplasm, associates with pre-40S ribosomal particles	1.82933	330	No
SMX2	YFL017W-A	Core Sm protein Sm G; part of heteroheptameric complex (with Smb1p, Smd1p, Smd2p, Smd3p, Sme1p, and Smx3p) that is part of the spliceosomal U1, U2, U4, and U5 snRNPs; homolog of human Sm G	1.82895	331	Yes
IRC23	YOR044W	Putative protein of unknown function; green fluorescent protein (GFP)-fusion localizes to the ER; null mutant displays increased levels of spontaneous Rad52p foci	1.82767	332	No
YFH7	YFR007W	Putative kinase with similarity to the phosphoribulokinase/uridine kinase/bacterial pantothenate kinase (PRK/URK/PANK) subfamily of P-loop kinases	1.82367	333	No
YPL257W-A	YPL257W-A	Retrotransposon TYA Gag gene co-transcribed with TYB Pol; translated as TYA or TYA-TYB polyprotein; Gag is a nucleocapsid protein that is the structural constituent of virus-like particles (VLPs); similar to retroviral Gag	1.823	334	Yes
TIP1	YBR067C	Major cell wall mannoprotein with possible lipase activity; transcription is induced by heat- and cold-shock; member of the Srp1p/Tip1p family of serine-alanine-rich proteins	1.81633	335	No
LHP1	YDL051W	RNA binding protein required for maturation of tRNA and U6 snRNA precursors; acts as a molecular chaperone for RNAs transcribed by polymerase III; homologous to human La (SS-B) autoantigen	1.81579	336	Yes
TEA1	YOR337W	Ty1 enhancer activator required for full levels of Ty enhancer-mediated transcription; C6 zinc cluster DNA-binding protein	1.81533	337	No
YGR269W	YGR269W	Dubious open reading frame unlikely to encode a protein, based on available experimental and comparative sequence data; partially overlaps the uncharacterized ORF HUA1/YGR268C	1.81467	338	No
YOR015W	YOR015W	Dubious open reading frame unlikely to encode a functional protein, based on available experimental and comparative sequence data	1.814	339	No
VPS45	YGL095C	Protein of the Sec1p/Munc-18 family, essential for vacuolar protein sorting; required for the function of Pep12p and the early endosome/late Golgi SNARE Tlg2p; essential for fusion of Golgi-derived vesicles with the prevacuolar compartment	1.81267	340	No
PPT2	YPL148C	Phosphopantetheine:protein transferase (PPTase), activates mitochondrial acyl carrier protein (Acp1p) by phosphopantetheinylation	1.81267	341	No
PRP9	YDL030W	Subunit of the SF3a splicing factor complex, required for spliceosome assembly; acts after the formation of the U1 snRNP-pre-mRNA complex	1.8125	342	Yes
NAB2	YGL122C	Nuclear polyadenylated RNA-binding protein required for nuclear mRNA export and poly(A) tail length control; binds nuclear pore protein Mlp1p; autoregulates mRNA levels; related to human hnRNPs; nuclear localization sequence binds Kap104p	1.8125	343	Yes
NHP2	YDL208W	Nuclear protein related to mammalian high mobility group (HMG) proteins, essential for function of H/ACA-type snoRNPs, which are involved in 18S rRNA processing	1.80952	344	Yes
DTD1	YDL219W	D-Tyr-tRNA(Tyr) deacylase, functions in protein translation, may affect nonsense suppression via alteration of the protein synthesis machinery; ubiquitous among eukaryotes	1.80933	345	No
SEC17	YBL050W	Peripheral membrane protein required for vesicular transport between ER and Golgi and for the 'priming' step in homotypic vacuole fusion, part of the cis-SNARE complex; has similarity to alpha-SNAP	1.80933	346	No
YDR034C-A	YDR034C-A	Putative protein of unknown function; contained within the solo Ty1 LTR element YDRWdelta7	1.809	347	No
OTU2	YHL013C	Protein of unknown function that may interact with ribosomes, based on co-purification experiments; member of the ovarian tumor-like (OTU) superfamily of predicted cysteine proteases; shows cytoplasmic localization	1.80867	348	No
AAD16	YFL057C	Putative aryl-alcohol dehydrogenase with similarity to P. chrysosporium aryl-alcohol dehydrogenase; mutational analysis has not yet revealed a physiological role	1.80733	349	No
YOR305W	YOR305W	Protein of unknown function; green fluorescent protein (GFP)-fusion protein localizes to the mitochondrion; deletion confers sensitivity to 4-(N-(S-glutathionylacetyl)amino) phenylarsenoxide (GSAO); YOR305W is not an essential gene	1.80567	350	No
RPL7A	YGL076C	Protein component of the large (60S) ribosomal subunit, nearly identical to Rpl7Bp and has similarity to E. coli L30 and rat L7 ribosomal proteins; contains a conserved C-terminal Nucleic acid Binding Domain (NDB2)	1.80366	351	Yes
YPL251W	YPL251W	Dubious open reading frame unlikely to encode a functional protein, based on available experimental and comparative sequence data; partially overlaps 5' end of the verified, essential gene YAH1/YPL252C	1.803	352	No
YHR180W	YHR180W	Dubious open reading frame unlikely to encode a protein, based on available experimental and comparative sequence data	1.803	353	No
MRP10	YDL045W-A	Mitochondrial ribosomal protein of the small subunit	1.80263	354	Yes
NCA3	YJL116C	Protein that functions with Nca2p to regulate mitochondrial expression of subunits 6 (Atp6p) and 8 (Atp8p ) of the Fo-F1 ATP synthase; member of the SUN family; expression induced in cells treated with the mycotoxin patulin	1.80167	355	No
ATP16	YDL004W	Delta subunit of the central stalk of mitochondrial F1F0 ATP synthase, which is a large, evolutionarily conserved enzyme complex required for ATP synthesis; phosphorylated	1.80033	356	No
UBP13	YBL067C	Putative ubiquitin carboxyl-terminal hydrolase, ubiquitin-specific protease that cleaves ubiquitin-protein fusions	1.79967	357	No
AVT3	YKL146W	Vacuolar transporter, exports large neutral amino acids from the vacuole; member of a family of seven S. cerevisiae genes (AVT1-7) related to vesicular GABA-glycine transporters	1.79967	358	No
YGR022C	YGR022C	Dubious open reading frame unlikely to encode a protein, based on available experimental and comparative sequence data; overlaps almost completely with the verified ORF MTL1/YGR023W	1.79967	359	No
NEJ1	YLR265C	Protein involved in regulation of nonhomologous end joining; interacts with DNA ligase IV components Dnl4p and Lif1p; repressed by MAT heterozygosity; regulates cellular distribution of Lif1p	1.79433	360	No
ALG5	YPL227C	UDP-glucose:dolichyl-phosphate glucosyltransferase, involved in asparagine-linked glycosylation in the endoplasmic reticulum	1.79367	361	No
FEN1	YCR034W	Fatty acid elongase, involved in sphingolipid biosynthesis; acts on fatty acids of up to 24 carbons in length; mutations have regulatory effects on 1,3-beta-glucan synthase, vacuolar ATPase, and the secretory pathway	1.792	362	No
YKL223W	YKL223W	Dubious open reading frame unlikely to encode a protein, based on available experimental and comparative sequence data	1.791	363	No
YNL035C	YNL035C	Putative protein of unknown function with similarity to proteins containing WD-40 domains; green fluorescent protein (GFP)-fusion protein localizes to the nucleus; YNL035C is not an essential gene	1.789	364	No
YBR064W	YBR064W	Dubious open reading frame unlikely to encode a protein; partially overlaps the uncharacterized ORF YBR063C	1.78833	365	No
NPC2	YDL046W	Functional homolog of human NPC2/He1, which is a cholesterol-binding protein whose deficiency causes Niemann-Pick type C2 disease involving retention of cholesterol in lysosomes	1.788	366	No
BSP1	YPR171W	Adapter that links synaptojanins Inp52p and Inp53p to the cortical actin cytoskeleton	1.788	367	No
LUC7	YDL087C	Essential protein associated with the U1 snRNP complex; splicing factor involved in recognition of 5' splice site; contains two zinc finger motifs; N-terminal zinc finger binds pre-mRNA	1.7875	368	Yes
YDR065W	YDR065W	Protein of unknown function, required for vacuolar acidification; the authentic, non-tagged protein is detected in highly purified mitochondria in high-throughput studies	1.78533	369	No
YPR127W	YPR127W	Protein of unknown function, differentially expressed during alcoholic fermentation; expression activated by transcription factor YRM1/YOR172W; green fluorescent protein (GFP)-fusion protein localizes to both the cytoplasm and the nucleus	1.785	370	No
PRM4	YPL156C	Pheromone-regulated protein, predicted to have 1 transmembrane segment; transcriptionally regulated by Ste12p during mating and by Cat8p during the diauxic shift	1.785	371	No
YNL284C-A	YNL284C-A	Retrotransposon TYA Gag gene co-transcribed with TYB Pol; translated as TYA or TYA-TYB polyprotein; Gag is a nucleocapsid protein that is the structural constituent of virus-like particles (VLPs); similar to retroviral Gag	1.78167	372	Yes
YPL182C	YPL182C	Dubious open reading frame unlikely to encode a protein, based on available experimental and comparative sequence data; partially overlaps the verified gene CTI6/YPL181W	1.78167	373	No
YDL218W	YDL218W	Putative protein of unknown function; YDL218W transcription is regulated by Azf1p and induced by starvation and aerobic conditions; expression also induced in cells treated with the mycotoxin patulin	1.78067	374	No
YIL012W	YIL012W	Dubious open reading frame unlikely to encode a protein, based on available experimental and comparative sequence data	1.77967	375	No
YIL028W	YIL028W	Dubious open reading frame unlikely to encode a protein, based on available experimental and comparative sequence data	1.77933	376	No
YBL055C	YBL055C	3'-->5' exonuclease and endonuclease with a possible role in apoptosis; has similarity to mammalian and C. elegans apoptotic nucleases	1.77733	377	No
BFR1	YOR198C	Component of mRNP complexes associated with polyribosomes; implicated in secretion and nuclear segregation; multicopy suppressor of BFA (Brefeldin A) sensitivity	1.77733	378	Yes
YKL044W	YKL044W	Dubious open reading frame unlikely to encode a functional protein, based on available experimental and comparative sequence data	1.77633	379	No
RPS9A	YPL081W	Protein component of the small (40S) ribosomal subunit; nearly identical to Rps9Bp and has similarity to E. coli S4 and rat S9 ribosomal proteins	1.77632	380	Yes
RPL2B	YIL018W	Protein component of the large (60S) ribosomal subunit, identical to Rpl2Ap and has similarity to E. coli L2 and rat L8 ribosomal proteins; expression is upregulated at low temperatures	1.77632	381	Yes
YCR050C	YCR050C	Non-essential protein of unknown function; deletion mutant is synthetically sick or lethal with alpha-synuclein	1.77567	382	No
OPI1	YHL020C	Transcriptional regulator of a variety of genes; phosphorylation by protein kinase A stimulates Opi1p function in negative regulation of phospholipid biosynthetic genes; involved in telomere maintenance	1.77433	383	Yes
ARV1	YLR242C	Protein functioning in transport of glycosylphosphatidylinositol intermediates into the ER lumen; required for normal intracellular sterol distribution and for sphingolipid metabolism; similar to Nup120p and C. elegans R05H5.5 protein	1.772	384	No
TIM21	YGR033C	Nonessential subunit of the Translocase of the Inner Mitochondrial membrane (TIM23 complex); interacts with the Translocase of the Outer Mitochondrial membrane (TOM complex) and with respiratory enzymes; may regulate TIM23 complex activity	1.76967	385	No
YDL119C	YDL119C	Putative mitochondrial transport protein; GFP-fusion protein is induced in response to the DNA-damaging agent MMS; the authentic, non-tagged protein is detected in purified mitochondria	1.76767	386	No
BRE1	YDL074C	E3 ubiquitin ligase for Rad6p, required for the ubiquitination of histone H2B, recruitment of Rad6p to promoter chromatin and subsequent methylation of histone H3 (on K4 and K79), contains RING finger domain	1.76767	387	No
FUR4	YBR021W	Uracil permease, localized to the plasma membrane; expression is tightly regulated by uracil levels and environmental cues	1.76733	388	No
YNG2	YHR090C	Subunit of the NuA4 histone acetyltransferase complex that acetylates histone H4 and H2A; has similarity to the human tumor suppressor ING1 and its isoforms ING4 and ING5	1.76733	389	No
DOC1	YGL240W	Processivity factor required for the ubiquitination activity of the anaphase promoting complex (APC), mediates the activity of the APC by contributing to substrate recognition; involved in cyclin proteolysis	1.76267	390	No
BET2	YPR176C	Beta subunit of Type II geranylgeranyltransferase required for vesicular transport between the endoplasmic reticulum and the Golgi; provides a membrane attachment moiety to Rab-like proteins Ypt1p and Sec4p	1.759	391	No
RBK1	YCR036W	Putative ribokinase	1.75833	392	No
COT1	YOR316C	Vacuolar transporter that mediates zinc transport into the vacuole; overexpression confers resistance to cobalt and rhodium	1.75733	393	No
HEM13	YDR044W	Coproporphyrinogen III oxidase, an oxygen requiring enzyme that catalyzes the sixth step in the heme biosynthetic pathway; transcription is repressed by oxygen and heme (via Rox1p and Hap1p)	1.75667	394	No
SNF6	YHL025W	Subunit of the SWI/SNF chromatin remodeling complex involved in transcriptional regulation; functions interdependently in transcriptional activation with Snf2p and Snf5p	1.753	395	No
POL30	YBR088C	Proliferating cell nuclear antigen (PCNA), functions as the sliding clamp for DNA polymerase delta; may function as a docking site for other proteins required for mitotic and meiotic chromosomal DNA replication and for DNA repair	1.75167	396	No
YDL062W	YDL062W	Dubious open reading frame unlikely to encode a protein, based on available experimental and comparative sequence data; partially overlaps uncharacterized ORF YDL063C; YDL062W is not essential	1.75067	397	No
INO1	YJL153C	Inositol 1-phosphate synthase, involved in synthesis of inositol phosphates and inositol-containing phospholipids; transcription is coregulated with other phospholipid biosynthetic genes by Ino2p and Ino4p, which bind the UASINO DNA element	1.75	398	No
YOL131W	YOL131W	Putative protein of unknown function	1.75	399	No
PTC1	YDL006W	Type 2C protein phosphatase (PP2C); inactivates the osmosensing MAPK cascade by dephosphorylating Hog1p; mutation delays mitochondrial inheritance; deletion reveals defects in precursor tRNA splicing, sporulation and cell separation	1.74667	400	No
RIB2	YOL066C	Bifunctional enzyme with DRAP deaminase and tRNA:pseudouridine synthase activity; the deaminase catalyzes the third step in riboflavin biosynthesis and the synthase catalyzes formation of pseudouridine at position 32 in cytoplasmic tRNAs	1.74551	401	Yes
CDC36	YDL165W	Component of the CCR4-NOT complex, which has multiple roles in regulating mRNA levels including regulation of transcription and destabilizing mRNAs by deadenylation; basal transcription factor	1.74533	402	No
YPR195C	YPR195C	Dubious open reading frame unlikely to encode a protein, based on available experimental and comparative sequence data	1.74333	403	No
CYT1	YOR065W	Cytochrome c1, component of the mitochondrial respiratory chain; expression is regulated by the heme-activated, glucose-repressed Hap2p/3p/4p/5p CCAAT-binding complex	1.74333	404	No
YJL216C	YJL216C	Protein of unknown function, similar to alpha-D-glucosidases; transcriptionally activated by both Pdr8p and Yrm1p, along with transporters and other genes involved in the pleiotropic drug resistance (PDR) phenomenon	1.74033	405	No
PRD1	YCL057W	Zinc metalloendopeptidase, found in the cytoplasm and intermembrane space of mitochondria; with Cym1p, involved in degradation of mitochondrial proteins and of presequence peptides cleaved from imported proteins	1.74	406	No
RPC82	YPR190C	RNA polymerase III subunit C82	1.738	407	No
CYK3	YDL117W	SH3-domain protein located in the mother-bud neck and the cytokinetic actin ring; mutant phenotype and genetic interactions suggest a role in cytokinesis	1.73467	408	No
GFD2	YCL036W	Protein of unknown function, identified as a high-copy suppressor of a dbp5 mutation	1.73333	409	No
CTL1	YMR180C	RNA 5'-triphosphatase, localizes to both the nucleus and cytoplasm	1.73077	410	Yes
DUN1	YDL101C	Cell-cycle checkpoint serine-threonine kinase required for DNA damage-induced transcription of certain target genes, phosphorylation of Rad55p and Sml1p, and transient G2/M arrest after DNA damage; also regulates postreplicative DNA repair	1.73067	411	No
BUD3	YCL014W	Protein involved in bud-site selection and required for axial budding pattern; localizes with septins to bud neck in mitosis and may constitute an axial landmark for next round of budding	1.72667	412	No
STD1	YOR047C	Protein involved in control of glucose-regulated gene expression; interacts with protein kinase Snf1p, glucose sensors Snf3p and Rgt2p, and TATA-binding protein Spt15p; acts as a regulator of the transcription factor Rgt1p	1.72667	413	No
YOR012W	YOR012W	Putative protein of unknown function	1.72633	414	No
RPO26	YPR187W	RNA polymerase subunit ABC23, common to RNA polymerases I, II, and III; part of central core; similar to bacterial omega subunit	1.723	415	No
PRP18	YGR006W	Splicing factor involved in the positioning of the 3' splice site during the second catalytic step of splicing, part of snRNP U5, interacts with Slu7p	1.721	416	Yes
YGR161W-A	YGR161W-A	Retrotransposon TYA Gag gene co-transcribed with TYB Pol; translated as TYA or TYA-TYB polyprotein; Gag is a nucleocapsid protein that is the structural constituent of virus-like particles (VLPs); similar to retroviral Gag	1.72067	417	Yes
PHO13	YDL236W	Alkaline phosphatase specific for p-nitrophenyl phosphate; also has protein phosphatase activity	1.71967	418	No
EMC4	YGL231C	Member of a transmembrane complex required for efficient folding of proteins in the ER; null mutant displays induction of the unfolded protein response; human ortholog TMEM85 may function in apoptosis	1.71833	419	No
APT2	YDR441C	Apparent pseudogene, not transcribed or translated under normal conditions; encodes a protein with similarity to adenine phosphoribosyltransferase, but artificially expressed protein exhibits no enzymatic activity	1.718	420	No
YBR056W	YBR056W	Putative cytoplasmic protein of unknown function	1.71667	421	No
MDE1	YJR024C	5'-methylthioribulose-1-phosphate dehydratase; acts in the methionine salvage pathway; potential Smt3p sumoylation substrate; expression downregulated by caspofungin and deletion mutant is caspofungin resistant	1.715	422	No
YDL023C	YDL023C	Dubious open reading frame, unlikely to encode a protein; not conserved in other Saccharomyces species; overlaps the verified gene GPD1; deletion confers sensitivity to GSAO; deletion in cyr1 mutant results in loss of stress resistance	1.715	423	No
YBR300C	YBR300C	Dubious open reading frame unlikely to encode a protein, based on available experimental and comparative sequence data; partially overlaps the verified gene YBR301W; YBR300C is not an essential gene	1.714	424	No
IDP1	YDL066W	Mitochondrial NADP-specific isocitrate dehydrogenase, catalyzes the oxidation of isocitrate to alpha-ketoglutarate; not required for mitochondrial respiration and may function to divert alpha-ketoglutarate to biosynthetic processes	1.713	425	No
YPL257W	YPL257W	Putative protein of unknown function; homozygous diploid deletion strain exhibits low budding index; physically interacts with Hsp82p; YPL257W is not an essential gene	1.71267	426	No
YLR392C	YLR392C	Putative protein of unknown function; green fluorescent protein (GFP)-fusion protein localizes to the cytoplasm; YLR392C is not an essential gene	1.71267	427	No
HST4	YDR191W	Member of the Sir2 family of NAD(+)-dependent protein deacetylases; involved along with Hst3p in silencing at telomeres, cell cycle progression, radiation resistance, genomic stability and short-chain fatty acid metabolism	1.712	428	No
FUN19	YAL034C	Non-essential protein of unknown function; expression induced in response to heat stress	1.71133	429	No
YLR460C	YLR460C	Member of the quinone oxidoreductase family, up-regulated in response to the fungicide mancozeb; possibly up-regulated by iodine	1.711	430	No
CDC10	YCR002C	Component of the septin ring of the mother-bud neck that is required for cytokinesis; septins recruit proteins to the neck and can act as a barrier to diffusion at the membrane, and they comprise the 10nm filaments seen with EM	1.70967	431	No
YNL024C	YNL024C	Putative protein of unknown function with seven beta-strand methyltransferase motif; green fluorescent protein (GFP)-fusion protein localizes to the cytoplasm; YNL024C is not an essential gene	1.70867	432	No
YDL034W	YDL034W	Dubious open reading frame unlikely to encode a protein, based on available experimental and comparative sequence data; partially overlaps with verified gene GPR1/YDL035C; YDL034W is not an essential gene	1.70833	433	No
OSH2	YDL019C	Member of an oxysterol-binding protein family with seven members in S. cerevisiae; family members have overlapping, redundant functions in sterol metabolism and collectively perform a function essential for viability	1.70833	434	No
VBA2	YBR293W	Permease of basic amino acids in the vacuolar membrane	1.70833	435	No
ARC15	YIL062C	Subunit of the ARP2/3 complex, which is required for the motility and integrity of cortical actin patches	1.70567	436	No
YEA6	YEL006W	Putative mitochondrial NAD+ transporter, member of the mitochondrial carrier subfamily (see also YIA6); has putative human ortholog	1.705	437	No
PBP4	YDL053C	Pbp1p binding protein, interacts strongly with Pab1p-binding protein 1 (Pbp1p) in the yeast two-hybrid system; also interacts with Lsm12p in a copurification assay	1.704	438	No
MAP1	YLR244C	Methionine aminopeptidase, catalyzes the cotranslational removal of N-terminal methionine from nascent polypeptides; function is partially redundant with that of Map2p	1.703	439	No
YDL027C	YDL027C	Putative protein of unknown function; the authentic, non-tagged protein is detected in highly purified mitochondria in high-throughput studies; YDL027C is not an essential gene	1.70167	440	No
CDC15	YAR019C	Protein kinase of the Mitotic Exit Network that is localized to the spindle pole bodies at late anaphase; promotes mitotic exit by directly switching on the kinase activity of Dbf2p; required for spindle disassembly after meiosis II	1.70033	441	No
CTM1	YHR109W	Cytochrome c lysine methyltransferase, trimethylates residue 72 of apo-cytochrome c (Cyc1p) in the cytosol; not required for normal respiratory growth	1.697	442	No
SIR2	YDL042C	Conserved NAD+ dependent histone deacetylase of the Sirtuin family involved in regulation of lifespan; plays roles in silencing at HML, HMR, telomeres, and the rDNA locus; negatively regulates initiation of DNA replication	1.697	443	No
SCS22	YBL091C-A	Protein involved in regulation of phospholipid metabolism; homolog of Scs2p; similar to D. melanogaster inturned protein	1.69667	444	No
PSY4	YBL046W	Putative regulatory subunit of an evolutionarily conserved protein phosphatase; localization is cell-cycle dependent and regulated by Cdc28p phosphorylation; required for cisplatin resistance; homolog of mammalian R2	1.694	445	No
FYV8	YGR196C	Protein of unknown function, required for survival upon exposure to K1 killer toxin	1.691	446	No
YGR073C	YGR073C	Dubious open reading frame unlikely to encode a functional protein, extensively overlaps essential SMD1 gene encoding a U6 snRNP protein	1.69067	447	No
RPN4	YDL020C	Transcription factor that stimulates expression of proteasome genes; Rpn4p levels are in turn regulated by the 26S proteasome in a negative feedback control mechanism; RPN4 is transcriptionally regulated by various stress responses	1.68833	448	No
QDR3	YBR043C	Multidrug transporter of the major facilitator superfamily, required for resistance to quinidine, barban, cisplatin, and bleomycin	1.68433	449	No
SFA1	YDL168W	Bifunctional enzyme containing both alcohol dehydrogenase and glutathione-dependent formaldehyde dehydrogenase activities, functions in formaldehyde detoxification and formation of long chain and complex alcohols, regulated by Hog1p-Sko1p	1.68433	450	No
VBA5	YKR105C	Putative transporter of the Major Facilitator Superfamily (MFS); proposed role as a basic amino acid permease based on phylogeny	1.68433	451	No
YHR214C-C	YHR214C-C	Retrotransposon TYA Gag gene co-transcribed with TYB Pol; translated as TYA or TYA-TYB polyprotein; Gag is a nucleocapsid protein that is the structural constituent of virus-like particles (VLPs); similar to retroviral Gag	1.68367	452	Yes
YJL211C	YJL211C	Dubious open reading frame unlikely to encode a protein, based on available experimental and comparative sequence data; partially overlaps the verified gene YJL210W/PEX2	1.68367	453	No
DUS4	YLR405W	Dihydrouridine synthase, member of a widespread family of conserved proteins including Smm1p, Dus1p, and Dus3p	1.6835	454	Yes
KNH1	YDL049C	Protein with similarity to Kre9p, which is involved in cell wall beta 1,6-glucan synthesis; overproduction suppresses growth defects of a kre9 null mutant; required for propionic acid resistance	1.683	455	No
RPL35B	YDL136W	Protein component of the large (60S) ribosomal subunit, identical to Rpl35Ap and has similarity to rat L35 ribosomal protein	1.68293	456	Yes
YGL218W	YGL218W	Dubious open reading frame, unlikely to encode a protein; not conserved in closely related Saccharomyces species; 93% of ORF overlaps the verified gene MDM34; deletion in cyr1 mutant results in loss of stress resistance	1.68267	457	No
SWD3	YBR175W	Essential subunit of the COMPASS (Set1C) complex, which methylates histone H3 on lysine 4 and is required in transcriptional silencing near telomeres; WD40 beta propeller superfamily member and ortholog of mammalian WDR5	1.682	458	No
YHL008C	YHL008C	Putative protein of unknown function, may be involved in the uptake of chloride ions; does not appear to be involved in monocarboxylic acid transport; green fluorescent protein (GFP)-fusion protein localizes to the vacuole	1.68067	459	No
PNG1	YPL096W	Conserved peptide N-glycanase required for deglycosylation of misfolded glycoproteins during proteasome-dependent degradation, localizes to the cytoplasm and nucleus, interacts with the DNA repair protein Rad23p	1.68	460	No
RAD52	YML032C	Protein that stimulates strand exchange by facilitating Rad51p binding to single-stranded DNA; anneals complementary single-stranded DNA; involved in the repair of double-strand breaks in DNA during vegetative growth and meiosis	1.67933	461	No
TRX2	YGR209C	Cytoplasmic thioredoxin isoenzyme of the thioredoxin system which protects cells against oxidative and reductive stress, forms LMA1 complex with Pbi2p, acts as a cofactor for Tsa1p, required for ER-Golgi transport and vacuole inheritance	1.6785	462	No
YCL042W	YCL042W	Putative protein of unknown function; epitope-tagged protein localizes to the cytoplasm	1.678	463	No
YRB1	YDR002W	Ran GTPase binding protein; involved in nuclear protein import and RNA export, ubiquitin-mediated protein degradation during the cell cycle; shuttles between the nucleus and cytoplasm; is essential; homolog of human RanBP1	1.67733	464	No
YGR114C	YGR114C	Dubious open reading frame unlikely to encode a protein, based on available experimental and comparative sequence data; open reading frame overlaps 5' end of the essential gene SPT6	1.67733	465	No
COS1	YNL336W	Protein of unknown function, member of the DUP380 subfamily of conserved, often subtelomerically-encoded proteins	1.67633	466	No
COQ3	YOL096C	O-methyltransferase, catalyzes two different O-methylation steps in ubiquinone (Coenzyme Q) biosynthesis; component of a mitochondrial ubiquinone-synthesizing complex; phosphoprotein	1.67533	467	No
YGR051C	YGR051C	Dubious open reading frame unlikely to encode a protein, based on available experimental and comparative sequence data; YGR051C is not an essential gene	1.67367	468	No
DCS1	YLR270W	Non-essential hydrolase involved in mRNA decapping, may function in a feedback mechanism to regulate deadenylation, contains pyrophosphatase activity and a HIT (histidine triad) motif; interacts with neutral trehalase Nth1p	1.67333	469	No
RPN10	YHR200W	Non-ATPase base subunit of the 19S regulatory particle (RP) of the 26S proteasome; N-terminus plays a role in maintaining the structural integrity of the RP; binds selectively to polyubiquitin chains; homolog of the mammalian S5a protein	1.672	470	No
YGL235W	YGL235W	Putative protein of unknown function; potential Cdc28p substrate; null mutant displays increased resistance to antifungal agents gliotoxin, cycloheximide and H2O2	1.67167	471	No
HNT1	YDL125C	Adenosine 5'-monophosphoramidase; interacts physically and genetically with Kin28p, a CDK and TFIIK subunit, and genetically with CAK1; member of the histidine triad (HIT) superfamily of nucleotide-binding proteins and similar to Hint	1.67067	472	No
YOL153C	YOL153C	Hypothetical protein	1.66867	473	No
SLX5	YDL013W	Subunit of the Slx5-Slx8 SUMO-targeted ubiquitin ligase (STUbL) complex, stimulated by SUMO-modified substrates; contains a RING domain and two SIMs (SUMO-interacting motifs); forms SUMO-dependent nuclear foci, including DNA repair centers	1.66833	474	No
BUD31	YCR063W	Component of the SF3b subcomplex of the U2 snRNP; diploid mutants display a random budding pattern instead of the wild-type bipolar pattern	1.665	475	No
SHR5	YOL110W	Subunit of a palmitoyltransferase, composed of Shr5p and Erf2p, that adds a palmitoyl lipid moiety to heterolipidated substrates such as Ras1p and Ras2p through a thioester linkage; palmitoylation is required for Ras2p membrane localization	1.66333	476	No
GPD1	YDL022W	NAD-dependent glycerol-3-phosphate dehydrogenase, key enzyme of glycerol synthesis, essential for growth under osmotic stress; expression regulated by high-osmolarity glycerol response pathway; homolog of Gpd2p	1.661	477	No
YOR392W	YOR392W	Dubious open reading frame unlikely to encode a protein, based on available experimental and comparative sequence data; gene expression induced by heat	1.658	478	No
SOD2	YHR008C	Mitochondrial superoxide dismutase, protects cells against oxygen toxicity; phosphorylated	1.654	479	No
YPR059C	YPR059C	Dubious open reading frame unlikely to encode a protein, based on available experimental and comparative sequence data; partially overlaps the verified gene YMC1/YPR058W	1.653	480	No
YER156C	YER156C	Putative protein of unknown function; interacts with Hsp82p and copurifies with Ipl1p; expression is copper responsive and downregulated in strains deleted for MAC1, a copper-responsive transcription factor; similarity to mammalian MYG1	1.65267	481	No
UTP9	YHR196W	Nucleolar protein, component of the small subunit (SSU) processome containing the U3 snoRNA that is involved in processing of pre-18S rRNA	1.652	482	Yes
NAB6	YML117W	Putative RNA-binding protein that associates with mRNAs encoding cell wall proteins in high-throughput studies; deletion mutants display increased sensitivity to some cell wall disrupting agents; expression negatively regulated by cAMP	1.652	483	Yes
YBL065W	YBL065W	Dubious open reading frame unlikely to encode a protein, based on available experimental and comparative sequence data; partially overlaps verified ORF SEF1/YBL066C; YBL065W is a non-essential gene	1.65033	484	No
BUD23	YCR047C	Protein involved in bud-site selection; diploid mutants display a random budding pattern instead of the wild-type bipolar pattern	1.65	485	No
HIP1	YGR191W	High-affinity histidine permease, also involved in the transport of manganese ions	1.649	486	No
RPL25	YOL127W	Primary rRNA-binding ribosomal protein component of the large (60S) ribosomal subunit, has similarity to E. coli L23 and rat L23a ribosomal proteins; binds to 26S rRNA via a conserved C-terminal motif	1.64865	487	Yes
SHR3	YDL212W	Endoplasmic reticulum packaging chaperone, required for incorporation of amino acid permeases into COPII coated vesicles for transport to the cell surface	1.64533	488	No
YHK8	YHR048W	Presumed antiporter of the DHA1 family of multidrug resistance transporters; contains 12 predicted transmembrane spans; expression of gene is up-regulated in cells exhibiting reduced susceptibility to azoles	1.64433	489	No
SCS3	YGL126W	Protein required for inositol prototrophy, identified as an ortholog of the FIT family of proteins involved in triglyceride droplet biosynthesis; disputed role in the synthesis of inositol phospholipids from inositol	1.643	490	No
CBF1	YJR060W	Helix-loop-helix protein that binds the motif CACRTG, which is present at several sites including MET gene promoters and centromere DNA element I (CDEI); required for nucleosome positioning at this motif; targets Isw1p to DNA	1.64267	491	No
MSI1	YBR195C	Subunit of chromatin assembly factor I (CAF-1), negative regulator of the RAS/cAMP pathway via sequestration of Npr1p kinase; localizes to the nucleus and cytoplasm; homologous to human retinoblastoma binding proteins RbAp48 and RbAp46	1.641	492	No
RPS25B	YLR333C	Protein component of the small (40S) ribosomal subunit; nearly identical to Rps25Ap and has similarity to rat S25 ribosomal protein	1.64076	493	Yes
YGR122W	YGR122W	Probable ortholog of A. nidulans PalC, which is involved in pH regulation and binds to the ESCRT-III complex; null mutant does not properly process Rim101p and has decreased resistance to rapamycin; GFP-fusion protein is cytoplasmic	1.64033	494	No
CTR86	YCR054C	Essential protein of unknown function; upstream region contains a Gcn4p responsive site suggesting a possible role in amino acid biosynthesis	1.64	495	No
RPL33A	YPL143W	N-terminally acetylated ribosomal protein L37 of the large (60S) ribosomal subunit, nearly identical to Rpl33Bp and has similarity to rat L35a; rpl33a null mutant exhibits slow growth while rpl33a rpl33b double null mutant is inviable	1.63833	496	Yes
YCR013C	YCR013C	Dubious open reading frame unlikely to encode a protein, based on available experimental and comparative sequence data; transcription of both YCR013C and the overlapping essential gene PGK1 is reduced in a gcr1 null mutant	1.63667	497	No
YOL134C	YOL134C	Dubious open reading frame unlikely to encode a protein, based on experimental and comparative sequence data; partially overlaps HRT1, a verified gene that encodes an SCF ubiquitin ligase subunit	1.636	498	No
ASM4	YDL088C	Nuclear pore complex subunit, part of a subcomplex also containing Nup53p, Nup170p, and Pse1p	1.635	499	No
YCR061W	YCR061W	Protein of unknown function; green fluorescent protein (GFP)-fusion protein localizes to the cytoplasm in a punctate pattern; induced by treatment with 8-methoxypsoralen and UVA irradiation	1.63233	500	No
MCM4	YPR019W	Essential helicase component of heterohexameric MCM2-7 complexes which bind pre-replication complexes on DNA and melt the DNA prior to replication; accumulates in the nucleus in G1; homolog of S. pombe Cdc21p	1.63	501	No
TPM1	YNL079C	Major isoform of tropomyosin; binds to and stabilizes actin cables and filaments, which direct polarized cell growth and the distribution of several organelles; acetylated by the NatB complex and acetylated form binds actin most efficiently	1.62933	502	No
BUG1	YDL099W	Cis-golgi localized protein involved in ER to Golgi transport; forms a complex with the mammalian GRASP65 homolog, Grh1p; mutants are compromised for the fusion of ER-derived vesicles with Golgi membranes	1.62667	503	No
YCL068C	YCL068C	Putative protein of unknown function	1.62467	504	No
MRP20	YDR405W	Mitochondrial ribosomal protein of the large subunit	1.62449	505	Yes
MRK1	YDL079C	Glycogen synthase kinase 3 (GSK-3) homolog; one of four GSK-3 homologs in S. cerevisiae that function to activate Msn2p-dependent transcription of stress responsive genes and that function in protein degradation	1.62333	506	No
UBC9	YDL064W	SUMO-conjugating enzyme involved in the Smt3p conjugation pathway; nuclear protein required for S- and M-phase cyclin degradation and mitotic control; involved in proteolysis mediated by the anaphase-promoting complex cyclosome (APCC)	1.622	507	No
URN1	YPR152C	Putative protein of unknown function containing WW and FF domains; overexpression causes accumulation of cells in G1 phase	1.62167	508	Yes
YPT35	YHR105W	Endosomal protein of unknown function that contains a phox (PX) homology domain and binds to both phosphatidylinositol-3-phosphate (PtdIns(3)P) and proteins involved in ER-Golgi or vesicular transport	1.621	509	No
PPH21	YDL134C	Catalytic subunit of protein phosphatase 2A, functionally redundant with Pph22p; methylated at C terminus; forms alternate complexes with several regulatory subunits; involved in signal transduction and regulation of mitosis	1.62067	510	No
STR3	YGL184C	Cystathionine beta-lyase, converts cystathionine into homocysteine	1.62	511	No
PEX1	YKL197C	AAA-peroxin that heterodimerizes with AAA-peroxin Pex6p and participates in the recycling of peroxisomal signal receptor Pex5p from the peroxisomal membrane to the cystosol; induced by oleic acid and upregulated during anaerobiosis	1.61833	512	No
TRX3	YCR083W	Mitochondrial thioredoxin, highly conserved oxidoreductase required to maintain the redox homeostasis of the cell, forms the mitochondrial thioredoxin system with Trr2p, redox state is maintained by both Trr2p and Glr1p	1.617	513	No
YIL176C	YIL176C	Putative protein of unknown function	1.61667	514	No
CMS1	YLR003C	Subunit of U3-containing 90S preribosome processome complex involved in production of 18S rRNA and assembly of small ribosomal subunit; overexpression rescues supressor mutant of mcm10; null mutant is viable	1.616	515	No
YBR287W	YBR287W	Protein of unknown function; green fluorescent protein (GFP)-fusion protein localizes to the ER; YBR287W is not an essential gene	1.61433	516	No
IST1	YNL265C	Protein with a positive role in the multivesicular body sorting pathway; functions and forms a complex with Did2p; recruitment to endosomes is mediated by the Vps2p-Vps24p subcomplex of ESCRT-III; also interacts with Vps4p	1.61333	517	No
PRP31	YGR091W	Splicing factor, component of the U4/U6-U5 snRNP complex	1.61235	518	Yes
YPL245W	YPL245W	Putative protein of unknown function; green fluorescent protein (GFP)-fusion protein localizes to both the nucleus and the cytoplasm	1.611	519	No
PST2	YDR032C	Protein with similarity to members of a family of flavodoxin-like proteins; induced by oxidative stress in a Yap1p dependent manner; the authentic, non-tagged protein is detected in highly purified mitochondria in high-throughput studies	1.60867	520	No
YBR028C	YBR028C	Putative protein kinase, possible substrate of cAMP-dependent protein kinase (PKA)	1.60767	521	No
YGL230C	YGL230C	Putative protein of unknown function; non-essential gene	1.60767	522	No
YGR053C	YGR053C	Putative protein of unknown function	1.60733	523	No
LYS14	YDR034C	Transcriptional activator involved in regulation of genes of the lysine biosynthesis pathway; requires 2-aminoadipate semialdehyde as co-inducer	1.607	524	No
SIS2	YKR072C	Negative regulatory subunit of the protein phosphatase 1 Ppz1p; involved in ion homeostasis and cell cycle progression	1.60567	525	No
BIR1	YJR089W	Subunit of chromosomal passenger complex (CPC; Ipl1p-Sli15p-Bir1p-Nbl1p), which regulates chromosome segregation; required for chromosome bi-orientation and for spindle assembly checkpoint activation upon reduced sister kinetochore tension	1.60433	526	No
RRT12	YCR045C	Putative protein of unknown function; non-essential gene identified in a screen for mutants with decreased levels of rDNA transcription	1.604	527	No
RPL11B	YGR085C	Protein component of the large (60S) ribosomal subunit, nearly identical to Rpl11Ap; involved in ribosomal assembly; depletion causes degradation of proteins and RNA of the 60S subunit; has similarity to E. coli L5 and rat L11	1.60279	528	Yes
IPP1	YBR011C	Cytoplasmic inorganic pyrophosphatase (PPase), homodimer that catalyzes the rapid exchange of oxygens from Pi with water, highly expressed and essential for viability, active-site residues show identity to those from E. coli PPase	1.60033	529	No
YGK3	YOL128C	Protein kinase related to mammalian glycogen synthase kinases of the GSK-3 family; GSK-3 homologs (Mck1p, Rim11p, Mrk1p, Ygk3p) are involved in control of Msn2p-dependent transcription of stress responsive genes and in protein degradation	1.6	530	No
NSA2	YER126C	Protein constituent of 66S pre-ribosomal particles, contributes to processing of the 27S pre-rRNA	1.6	531	No
LEU2	YCL018W	Beta-isopropylmalate dehydrogenase (IMDH), catalyzes the third step in the leucine biosynthesis pathway	1.59867	532	No
YOR082C	YOR082C	Dubious open reading frame unlikely to encode a protein, based on experimental and comparative sequence data; partially overlaps the verified gene YOR083W	1.59667	533	No
WRS1	YOL097C	Cytoplasmic tryptophanyl-tRNA synthetase, aminoacylates tryptophanyl-tRNA	1.59487	534	Yes
NFS1	YCL017C	Cysteine desulfurase involved in iron-sulfur cluster (Fe/S) biogenesis; required for the post-transcriptional thio-modification of mitochondrial and cytoplasmic tRNAs; essential protein located predominantly in mitochondria	1.59433	535	No
MEK1	YOR351C	Meiosis-specific serine/threonine protein kinase, functions in meiotic checkpoint, promotes recombination between homologous chromosomes by suppressing double strand break repair between sister chromatids	1.59367	536	No
KTR2	YKR061W	Mannosyltransferase involved in N-linked protein glycosylation; member of the KRE2/MNT1 mannosyltransferase family	1.593	537	No
DBP10	YDL031W	Putative ATP-dependent RNA helicase of the DEAD-box protein family, constituent of 66S pre-ribosomal particles; essential protein involved in ribosome biogenesis	1.59233	538	Yes
LST4	YKL176C	Protein possibly involved in a post-Golgi secretory pathway; required for the transport of nitrogen-regulated amino acid permease Gap1p from the Golgi to the cell surface	1.59233	539	No
YKL225W	YKL225W	Dubious open reading frame unlikely to encode a functional protein, based on available experimental and comparative sequence data	1.59033	540	No
RHB1	YCR027C	Putative Rheb-related GTPase involved in regulating canavanine resistance and arginine uptake; member of the Ras superfamily of G-proteins	1.589	541	No
OLA1	YBR025C	P-loop ATPase with similarity to human OLA1 and bacterial YchF; identified as specifically interacting with the proteasome; protein levels are induced by hydrogen peroxide	1.58833	542	No
YOR352W	YOR352W	Putative protein of unknown function; expression levels regulated by Arg5,6p; green fluorescent protein (GFP)-fusion protein localizes to the cytoplasm and nucleus	1.58833	543	No
YCR099C	YCR099C	Putative protein of unknown function	1.58833	544	No
VMA22	YHR060W	Peripheral membrane protein that is required for vacuolar H+-ATPase (V-ATPase) function, although not an actual component of the V-ATPase complex; functions in the assembly of the V-ATPase; localized to the yeast endoplasmic reticulum (ER)	1.58733	545	No
TIR2	YOR010C	Putative cell wall mannoprotein of the Srp1p/Tip1p family of serine-alanine-rich proteins; transcription is induced by cold shock and anaerobiosis	1.585	546	No
GPB2	YAL056W	Multistep regulator of cAMP-PKA signaling; inhibits PKA downstream of Gpa2p and Cyr1p, thereby increasing cAMP dependency; inhibits Ras activity through direct interactions with Ira1p/2p; regulated by G-alpha protein Gpa2p; homolog of Gpb1p	1.58433	547	No
RMD1	YDL001W	Cytoplasmic protein required for sporulation	1.584	548	No
OPI3	YJR073C	Phospholipid methyltransferase (methylene-fatty-acyl-phospholipid synthase), catalyzes the last two steps in phosphatidylcholine biosynthesis	1.58367	549	No
RAD2	YGR258C	Single-stranded DNA endonuclease, cleaves single-stranded DNA during nucleotide excision repair to excise damaged DNA; subunit of Nucleotide Excision Repair Factor 3 (NEF3); homolog of human XPG protein	1.5835	550	No
GZF3	YJL110C	GATA zinc finger protein and Dal80p homolog that negatively regulates nitrogen catabolic gene expression by competing with Gat1p for GATA site binding; function requires a repressive carbon source; dimerizes with Dal80p and binds to Tor1p	1.583	551	No
YNL313C	YNL313C	Essential protein of unknown function; fluorescent protein (GFP or YFP)-tagged protein localizes to cytoplasm and nucleus	1.58033	552	No
AIM21	YIR003W	Protein of unknown function; may interact with ribosomes; GFP-fusion protein colocalizes with Sac1p to the actin cytoskeleton; YIR003W is not an essential gene; null mutant displays elevated frequency of mitochondrial genome loss	1.579	553	No
RPP1	YHR062C	Subunit of both RNase MRP, which cleaves pre-rRNA, and nuclear RNase P, which cleaves tRNA precursors to generate mature 5' ends	1.57895	554	Yes
GET3	YDL100C	Guanine nucleotide exchange factor for Gpa1p; amplifies G protein signaling; subunit of the GET complex, which is involved in Golgi to ER trafficking and insertion of proteins into the ER membrane; has low-level ATPase activity	1.57767	555	No
APL1	YJR005W	Beta-adaptin, large subunit of the clathrin associated protein complex (AP-2); involved in vesicle mediated transport; similar to mammalian beta-chain of the clathrin associated protein complex	1.57767	556	No
YGR018C	YGR018C	Dubious open reading frame unlikely to encode a protein, based on available experimental and comparative sequence data; partially overlaps the uncharacterized ORF YGR017W	1.57767	557	No
SHU1	YHL006C	Protein involved in a Rad51p-, Rad54p-dependent pathway for homologous recombination repair, important for error-free repair of spontaneous and induced DNA lesions to protect the genome from mutation; associates with Shu2p, Psy3p, and Csm2p	1.57733	558	No
CYC1	YJR048W	Cytochrome c, isoform 1; electron carrier of the mitochondrial intermembrane space that transfers electrons from ubiquinone-cytochrome c oxidoreductase to cytochrome c oxidase during cellular respiration	1.577	559	No
RDS2	YPL133C	Zinc cluster transcriptional activator involved in conferring resistance to ketoconazole	1.57667	560	No
SUB2	YDL084W	Component of the TREX complex required for nuclear mRNA export; member of the DEAD-box RNA helicase superfamily and is involved in early and late steps of spliceosome assembly; homolog of the human splicing factor hUAP56	1.575	561	Yes
YOR021C	YOR021C	Putative protein of unknown function; YOR021C is not an essential gene; predicted to be involved in rRNA processing and ribosome biogenesis and in biopolymer catabolism	1.57433	562	No
APC11	YDL008W	Catalytic core subunit of the Anaphase-Promoting Complex/Cyclosome (APC/C), which is a ubiquitin-protein ligase required for degradation of anaphase inhibitors, including mitotic cyclins, during the metaphase/anaphase transition	1.57367	563	No
PTC6	YCR079W	Mitochondrial protein phosphatase of type 2C with similarity to mammalian PP1Ks; involved in mitophagy; null mutant is sensitive to rapamycin and has decreased phosphorylation of the Pda1 subunit of pyruvate dehydrogenase	1.57233	564	No
YBL086C	YBL086C	Protein of unknown function; green fluorescent protein (GFP)-fusion protein localizes to the cell periphery	1.57233	565	No
YDL086W	YDL086W	Putative protein of unknown function; the authentic, non-tagged protein is detected in highly purified mitochondria in high-throughput studies; YDL086W is not an essential gene	1.57233	566	No
JIP5	YPR169W	Essential protein of unknown function; interacts with proteins involved in RNA processing, ribosome biogenesis, ubiquitination and demethylation; tagged protein localizes to nucleus and nucleolus; similar to WDR55, a human WD repeat protein	1.572	567	No
AVT6	YER119C	Vacuolar amino acid transporter, exports aspartate and glutamate from the vacuole; member of a family of seven S. cerevisiae genes (AVT1-7) related to vesicular GABA-glycine transporters	1.57067	568	No
VPH2	YKL119C	Integral membrane protein required for vacuolar H+-ATPase (V-ATPase) function, although not an actual component of the V-ATPase complex; functions in the assembly of the V-ATPase; localized to the endoplasmic reticulum (ER)	1.56933	569	No
UTP30	YKR060W	Subunit of U3-containing 90S preribosome complex involved in production of 18S rRNA and assembly of small ribosomal subunit	1.56867	570	No
UBP6	YFR010W	Ubiquitin-specific protease situated in the base subcomplex of the 26S proteasome, releases free ubiquitin from branched polyubiquitin chains; works in opposition to polyubiquitin elongation activity of Hul5p	1.56833	571	No
RPL34B	YIL052C	Protein component of the large (60S) ribosomal subunit, nearly identical to Rpl34Ap and has similarity to rat L34 ribosomal protein	1.56757	572	Yes
YGR015C	YGR015C	Putative protein of unknown function; green fluorescent protein (GFP)-fusion protein localizes to the mitochondrion	1.567	573	No
UBX3	YDL091C	UBX (ubiquitin regulatory X) domain-containing protein that interacts with Cdc48p, green fluorescent protein (GFP)-fusion protein localizes to the cytoplasm in a punctate pattern	1.567	574	No
CDC7	YDL017W	DDK (Dbf4-dependent kinase) catalytic subunit required for firing origins and replication fork progression in mitosis through phosphorylation of Mcm2-7p complexes and Cdc45p; kinase activity correlates with cyclical DBF4 expression	1.56667	575	No
YPR099C	YPR099C	Dubious open reading frame unlikely to encode a protein, based on available experimental and comparative sequence data; partially overlaps the verified gene MRPL51/YPR100W	1.56633	576	No
YCK1	YHR135C	Palmitoylated plasma membrane-bound casein kinase I isoform; shares redundant functions with Yck2p in morphogenesis, proper septin assembly, endocytic trafficking; provides an essential function overlapping with that of Yck2p	1.566	577	No
IRC19	YLL033W	Putative protein of unknown function; YLL033W is not an essential gene but mutant is defective in spore formation; null mutant displays increased levels of spontaneous Rad52p foci	1.56267	578	No
CLB5	YPR120C	B-type cyclin involved in DNA replication during S phase; activates Cdc28p to promote initiation of DNA synthesis; functions in formation of mitotic spindles along with Clb3p and Clb4p; most abundant during late G1 phase	1.56267	579	No
PTC7	YHR076W	Type 2C protein phosphatase; YHR076W is alternatively spliced to create two mRNA isoforms; protein from spliced form localizes to the mitochondria while the one from the unspliced form is localized to the nuclear envelope	1.56267	580	No
YDL118W	YDL118W	Non-essential protein of unconfirmed function; mutants are defective in telomere maintenance, and are synthetically sick or lethal with alpha-synuclein	1.56267	581	No
ENT5	YDR153C	Protein containing an N-terminal epsin-like domain involved in clathrin recruitment and traffic between the Golgi and endosomes; associates with the clathrin adaptor Gga2p, clathrin adaptor complex AP-1, and clathrin	1.562	582	No
AXL1	YPR122W	Haploid specific endoprotease that performs one of two N-terminal cleavages during maturation of a-factor mating pheromone; required for axial budding pattern of haploid cells	1.561	583	No
BRX1	YOL077C	Nucleolar protein, constituent of 66S pre-ribosomal particles; depletion leads to defects in rRNA processing and a block in the assembly of large ribosomal subunits; possesses a sigma(70)-like RNA-binding motif	1.561	584	Yes
YKR018C	YKR018C	Putative protein of unknown function; green fluorescent protein (GFP)-fusion protein localizes to the cytoplasm and nucleus	1.5605	585	No
YBL036C	YBL036C	Putative non-specific single-domain racemase based on structural similarity; binds pyridoxal 5'-phosphate; expression of GFP-fusion protein induced in response to the DNA-damaging agent MMS	1.56033	586	No
YLR202C	YLR202C	Dubious open reading frame unlikely to encode a protein, based on available experimental and comparative sequence data; partially overlaps the verified ORF YLR201C; ORF contains a putative intron	1.55967	587	No
YJU2	YKL095W	Essential protein required for pre-mRNA splicing; associates transiently with the spliceosomal NTC ("nineteen complex") and acts after Prp2p to promote the first catalytic reaction of splicing	1.55833	588	Yes
HUA1	YGR268C	Cytoplasmic protein containing a zinc finger domain with sequence similarity to that of Type I J-proteins; computational analysis of large-scale protein-protein interaction data suggests a possible role in actin patch assembly	1.55733	589	No
SHP1	YBL058W	UBX (ubiquitin regulatory X) domain-containing protein that regulates Glc7p phosphatase activity and interacts with Cdc48p; interacts with ubiquitylated proteins in vivo and is required for degradation of a ubiquitylated model substrate	1.55667	590	No
YPL044C	YPL044C	Dubious open reading frame unlikely to encode a protein, based on available experimental and comparative sequence data; partially overlaps the verified gene NOP4/YPL043W	1.55567	591	No
MXR2	YCL033C	Methionine-R-sulfoxide reductase, involved in the response to oxidative stress; protects iron-sulfur clusters from oxidative inactivation along with MXR1; involved in the regulation of lifespan	1.55567	592	No
LYS1	YIR034C	Saccharopine dehydrogenase (NAD+, L-lysine-forming), catalyzes the conversion of saccharopine to L-lysine, which is the final step in the lysine biosynthesis pathway	1.555	593	No
CYB2	YML054C	Cytochrome b2 (L-lactate cytochrome-c oxidoreductase), component of the mitochondrial intermembrane space, required for lactate utilization; expression is repressed by glucose and anaerobic conditions	1.555	594	No
YCR049C	YCR049C	Dubious open reading frame unlikely to encode a protein, based on available experimental and comparative sequence data	1.551	595	No
MNN2	YBR015C	Alpha-1,2-mannosyltransferase, responsible for addition of the first alpha-1,2-linked mannose to form the branches on the mannan backbone of oligosaccharides, localizes to an early Golgi compartment	1.55067	596	No
PAC10	YGR078C	Part of the heteromeric co-chaperone GimC/prefoldin complex, which promotes efficient protein folding	1.55033	597	No
ATP4	YPL078C	Subunit b of the stator stalk of mitochondrial F1F0 ATP synthase, which is a large, evolutionarily conserved enzyme complex required for ATP synthesis; phosphorylated	1.54933	598	No
MPE1	YKL059C	Essential conserved subunit of CPF (cleavage and polyadenylation factor), plays a role in 3' end formation of mRNA via the specific cleavage and polyadenylation of pre-mRNA, contains a putative RNA-binding zinc knuckle motif	1.5487	599	Yes
TAT1	YBR069C	Amino acid transport protein for valine, leucine, isoleucine, and tyrosine, low-affinity tryptophan and histidine transporter; overexpression confers FK506 and FTY720 resistance	1.54867	600	No
MET30	YIL046W	F-box protein containing five copies of the WD40 motif, controls cell cycle function, sulfur metabolism, and methionine biosynthesis as part of the ubiquitin ligase complex; interacts with and regulates Met4p, localizes within the nucleus	1.548	601	No
SAM35	YHR083W	Essential component of the sorting and assembly machinery (SAM complex or TOB complex) of the mitochondrial outer membrane, which binds precursors of beta-barrel proteins and facilitates their insertion into the outer membrane	1.548	602	No
GNP1	YDR508C	High-affinity glutamine permease, also transports Leu, Ser, Thr, Cys, Met and Asn; expression is fully dependent on Grr1p and modulated by the Ssy1p-Ptr3p-Ssy5p (SPS) sensor of extracellular amino acids	1.546	603	No
LSP1	YPL004C	Primary component of eisosomes, which are large immobile patch structures at the cell cortex associated with endocytosis, along with Pil1p and Sur7p; null mutants show activation of Pkc1p/Ypk1p stress resistance pathways	1.54567	604	No
YOL163W	YOL163W	Putative protein of unknown function; member of the Dal5p subfamily of the major facilitator family	1.545	605	No
HAP5	YOR358W	Subunit of the heme-activated, glucose-repressed Hap2/3/4/5 CCAAT-binding complex, a transcriptional activator and global regulator of respiratory gene expression; required for assembly and DNA binding activity of the complex	1.545	606	No
MATALPHA2	YCR039C	Homeobox-domain protein that, with Mcm1p, represses a-specific genes in haploids; acts with A1p to repress transcription of haploid-specific genes in diploids; one of two genes encoded by the MATalpha mating type cassette	1.54467	607	No
NRG1	YDR043C	Transcriptional repressor that recruits the Cyc8p-Tup1p complex to promoters; mediates glucose repression and negatively regulates a variety of processes including filamentous growth and alkaline pH response	1.544	608	No
QCR7	YDR529C	Subunit 7 of the ubiquinol cytochrome-c reductase complex, which is a component of the mitochondrial inner membrane electron transport chain; oriented facing the mitochondrial matrix; N-terminus appears to play a role in complex assembly	1.544	609	No
CAB2	YIL083C	Probable phosphopantothenoylcysteine synthetase (PPCS), which catalyzes the second step of coenzyme A biosynthesis from pantothenate; null mutant lethality is complemented by E. coli coaBC (encoding a bifunctional enzyme with PPCS activity)	1.54233	610	No
RPB5	YBR154C	RNA polymerase subunit ABC27, common to RNA polymerases I, II, and III; contacts DNA and affects transactivation	1.54233	611	No
FMP37	YGL080W	Putative protein of unknown function; highly conserved across species and orthologous to human gene BRP44L; the authentic, non-tagged protein is detected in highly purified mitochondria in high-throughput studies	1.54167	612	No
YDR391C	YDR391C	Putative protein of unknown function, possibly involved in zinc homeostasis; Bdf1p-dependent transcription induced by salt stress; green fluorescent protein (GFP)-fusion protein localizes to both the cytoplasm and the nucleus	1.54167	613	No
AGA1	YNR044W	Anchorage subunit of a-agglutinin of a-cells, highly O-glycosylated protein with N-terminal secretion signal and C-terminal signal for addition of GPI anchor to cell wall, linked to adhesion subunit Aga2p via two disulfide bonds	1.54167	614	No
ARP3	YJR065C	Essential component of the Arp2/3 complex, which is a highly conserved actin nucleation center required for the motility and integrity of actin patches; involved in endocytosis and membrane growth and polarity	1.54067	615	No
RSP5	YER125W	Ubiquitin-protein ligase involved in ubiquitin-mediated protein degradation; functions in multivesicular body sorting, heat shock response and ubiquitylation of arrested RNAPII; contains a hect (homologous to E6-AP carboxyl terminus) domain	1.53867	616	No
OYE3	YPL171C	Conserved NADPH oxidoreductase containing flavin mononucleotide (FMN), homologous to Oye2p with slight differences in ligand binding and catalytic properties; expression induced in cells treated with the mycotoxin patulin	1.53833	617	No
TFG2	YGR005C	TFIIF (Transcription Factor II) middle subunit; involved in both transcription initiation and elongation of RNA polymerase II; homologous to human RAP30	1.53733	618	No
VAC8	YEL013W	Phosphorylated and palmitoylated vacuolar membrane protein that interacts with Atg13p, required for the cytoplasm-to-vacuole targeting (Cvt) pathway; interacts with Nvj1p to form nucleus-vacuole junctions	1.53567	619	No
YCR001W	YCR001W	Dubious open reading frame unlikely to encode a protein, based on available experimental and comparative sequence data; YCR001W is not an essential gene	1.53533	620	No
RAD6	YGL058W	Ubiquitin-conjugating enzyme (E2), involved in postreplication repair (with Rad18p), sporulation, telomere silencing, and ubiquitin-mediated N-end rule protein degradation (with Ubr1p)	1.53433	621	No
HEH2	YDR458C	Inner nuclear membrane (INM) protein; contains helix-extension-helix (HEH) motif, nuclear localization signal sequence; targeting to the INM requires the Srp1p-Kap95p karyopherins and the Ran cycle	1.53367	622	No
YGL117W	YGL117W	Putative protein of unknown function	1.533	623	No
GIP1	YBR045C	Meiosis-specific regulatory subunit of the Glc7p protein phosphatase, regulates spore wall formation and septin organization, required for expression of some late meiotic genes and for normal localization of Glc7p	1.532	624	No
SPR1	YOR190W	Sporulation-specific exo-1,3-beta-glucanase; contributes to ascospore thermoresistance	1.53167	625	No
YHL044W	YHL044W	Putative integral membrane protein, member of DUP240 gene family; green fluorescent protein (GFP)-fusion protein localizes to the plasma membrane in a punctate pattern	1.531	626	No
COX20	YDR231C	Mitochondrial inner membrane protein, required for proteolytic processing of Cox2p and its assembly into cytochrome c oxidase	1.52767	627	No
CYT2	YKL087C	Cytochrome c1 heme lyase, involved in maturation of cytochrome c1, which is a subunit of the mitochondrial ubiquinol-cytochrome-c reductase; links heme covalently to apocytochrome c1	1.52733	628	No
RAM2	YKL019W	Alpha subunit of both the farnesyltransferase and type I geranylgeranyltransferase that catalyze prenylation of proteins containing a CAAX consensus motif; essential protein required for membrane localization of Ras proteins and a-factor	1.52567	629	No
PSA1	YDL055C	GDP-mannose pyrophosphorylase (mannose-1-phosphate guanyltransferase), synthesizes GDP-mannose from GTP and mannose-1-phosphate in cell wall biosynthesis; required for normal cell wall structure	1.52567	630	No
YLR124W	YLR124W	Dubious open reading frame unlikely to encode a protein, based on available experimental and comparative sequence data	1.52567	631	No
UTP8	YGR128C	Nucleolar protein required for export of tRNAs from the nucleus; also copurifies with the small subunit (SSU) processome containing the U3 snoRNA that is involved in processing of pre-18S rRNA	1.5256	632	Yes
YLR164W	YLR164W	Mitochondrial inner membrane of unknown function; similar to Tim18p and Sdh4p; expression induced by nitrogen limitation in a GLN3, GAT1-dependent manner	1.525	633	No
ATG14	YBR128C	Autophagy-specific subunit of phosphatidylinositol 3-kinase complex I (with Vps34/15/30p); Atg14p targets complex I to the phagophore assembly site (PAS); required for localizing additional ATG proteins to the PAS; homolog of human Barkor	1.52367	634	No
FLD1	YLR404W	Seipin protein involved in lipid droplet morphology, number, and size; proposed to be involved in lipid metabolism; related to the human BSCL2 which is associated with lipodystrophy	1.52367	635	No
SFT2	YBL102W	Non-essential tetra-spanning membrane protein found mostly in the late Golgi, can suppress some sed5 alleles; may be part of the transport machinery, but precise function is unknown; similar to mammalian syntaxin 5	1.52333	636	No
SEC23	YPR181C	GTPase-activating protein; component of the Sec23p-Sec24p heterodimeric complex of the COPII vesicle coat, involved in ER to Golgi transport and autophagy; stimulates the GDP-bound form of Sar1p	1.52333	637	No
FUR1	YHR128W	Uracil phosphoribosyltransferase, synthesizes UMP from uracil; involved in the pyrimidine salvage pathway	1.523	638	No
YHR192W	YHR192W	Putative protein of unknown function; green fluorescent protein (GFP)-fusion protein localizes to the cytoplasm and is induced in response to the DNA-damaging agent MMS	1.52233	639	No
URA7	YBL039C	Major CTP synthase isozyme (see also URA8), catalyzes the ATP-dependent transfer of the amide nitrogen from glutamine to UTP, forming CTP, the final step in de novo biosynthesis of pyrimidines; involved in phospholipid biosynthesis	1.521	640	No
SER33	YIL074C	3-phosphoglycerate dehydrogenase, catalyzes the first step in serine and glycine biosynthesis; isozyme of Ser3p	1.521	641	No
AIM25	YJR100C	Putative protein of unknown function; non-tagged protein is detected in purified mitochondria in high-throughput studies; similar to murine NOR1; null mutant is viable and displays elevated frequency of mitochondrial genome loss	1.52067	642	No
EAF7	YNL136W	Subunit of the NuA4 histone acetyltransferase complex, which acetylates the N-terminal tails of histones H4 and H2A	1.52033	643	No
RRT8	YOL048C	Putative protein of unknown function; identified in a screen for mutants with increased levels of rDNA transcription; green fluorescent protein (GFP)-fusion protein localizes to lipid particles	1.519	644	No
DIA4	YHR011W	Probable mitochondrial seryl-tRNA synthetase, mutant displays increased invasive and pseudohyphal growth	1.51859	645	Yes
GPI14	YJR013W	Glycosylphosphatidylinositol-alpha 1,4 mannosyltransferase I, involved in GPI anchor biosynthesis, requires Pbn1p for function; homolog of mammalian PIG-M	1.518	646	No
YDL114W	YDL114W	Putative protein of unknown function with similarity to acyl-carrier-protein reductases; YDL114W is not an essential gene	1.518	647	No
BRR6	YGL247W	Essential nuclear envelope integral membrane protein required for nuclear transport; depletion alters nucleoporin distribution and nuclear envelope morphology, suggesting a role in the spatial organization of nuclear pores	1.51633	648	No
TPK2	YPL203W	cAMP-dependent protein kinase catalytic subunit; promotes vegetative growth in response to nutrients via the Ras-cAMP signaling pathway; inhibited by regulatory subunit Bcy1p in the absence of cAMP; partially redundant with Tpk1p and Tpk3p	1.516	649	No
KES1	YPL145C	Member of the oxysterol binding protein family, which includes seven yeast homologs; involved in negative regulation of Sec14p-dependent Golgi complex secretory functions, peripheral membrane protein that localizes to the Golgi complex	1.51567	650	No
YGR026W	YGR026W	Putative protein of unknown function; green fluorescent protein (GFP)-fusion protein localizes to the cell periphery	1.51467	651	No
COS8	YHL048W	Nuclear membrane protein, member of the DUP380 subfamily of conserved, often subtelomerically-encoded proteins; regulation suggests a potential role in the unfolded protein response	1.51433	652	No
FTH1	YBR207W	Putative high affinity iron transporter involved in transport of intravacuolar stores of iron; forms complex with Fet5p; expression is regulated by iron; proposed to play indirect role in endocytosis	1.514	653	No
TPK1	YJL164C	cAMP-dependent protein kinase catalytic subunit; promotes vegetative growth in response to nutrients via the Ras-cAMP signaling pathway; inhibited by regulatory subunit Bcy1p in the absence of cAMP; partially redundant with Tpk2p and Tpk3p	1.513	654	No
YLR012C	YLR012C	Putative protein of unknown function; YLR012C is not an essential gene	1.51267	655	No
YLR211C	YLR211C	Putative protein of unknown function; green fluorescent protein (GFP)-fusion protein localizes to the cytoplasm; YLR211C is not an essential gene; ORF contains an intron	1.512	656	No
GIP3	YPL137C	Glc7-interacting protein whose overexpression relocalizes Glc7p from the nucleus and prevents chromosome segregation; may interact with ribosomes, based on co-purification experiments	1.51167	657	No
NCE102	YPR149W	Protein of unknown function; contains transmembrane domains; involved in secretion of proteins that lack classical secretory signal sequences; component of the detergent-insoluble glycolipid-enriched complexes (DIGs)	1.51133	658	No
CHL1	YPL008W	Conserved nuclear protein required to establish sister-chromatid pairing during S-phase, probable DNA helicase with similarity to human BACH1, which associates with tumor suppressor BRCA1; associates with acetyltransferase Ctf7p	1.51067	659	No
SSN3	YPL042C	Cyclin-dependent protein kinase, component of RNA polymerase II holoenzyme; involved in phosphorylation of the RNA polymerase II C-terminal domain; involved in glucose repression	1.51033	660	No
CTP1	YBR291C	Mitochondrial inner membrane citrate transporter, member of the mitochondrial carrier family	1.50833	661	No
RPS16B	YDL083C	Protein component of the small (40S) ribosomal subunit; identical to Rps16Ap and has similarity to E. coli S9 and rat S16 ribosomal proteins	1.50709	662	Yes
YPL199C	YPL199C	Putative protein of unknown function, predicted to be palmitoylated	1.507	663	No
CTR1	YPR124W	High-affinity copper transporter of the plasma membrane, mediates nearly all copper uptake under low copper conditions; transcriptionally induced at low copper levels and degraded at high copper levels	1.50567	664	No
ALG11	YNL048W	Alpha-1,2-mannosyltransferase, catalyzes sequential addition of the two terminal alpha 1,2-mannose residues to the Man5GlcNAc2-PP-dolichol intermediate during asparagine-linked glycosylation in the ER	1.50567	665	No
YPR137C-A	YPR137C-A	Retrotransposon TYA Gag gene co-transcribed with TYB Pol; translated as TYA or TYA-TYB polyprotein; Gag is a nucleocapsid protein that is the structural constituent of virus-like particles (VLPs); similar to retroviral Gag	1.50533	666	Yes
ERS1	YCR075C	Protein with similarity to human cystinosin, which is a H(+)-driven transporter involved in L-cystine export from lysosomes and implicated in the disease cystinosis; contains seven transmembrane domains	1.50533	667	No
YCR043C	YCR043C	Putative protein of unknown function; green fluorescent protein (GFP)-fusion protein localizes to the Golgi apparatus; YCR043C is not an essential gene	1.50533	668	No
YPR158W-A	YPR158W-A	Retrotransposon TYA Gag gene co-transcribed with TYB Pol; translated as TYA or TYA-TYB polyprotein; Gag is a nucleocapsid protein that is the structural constituent of virus-like particles (VLPs); similar to retroviral Gag	1.505	669	Yes
SET5	YHR207C	Zinc-finger protein of unknown function, contains one canonical and two unusual fingers in unusual arrangements; deletion enhances replication of positive-strand RNA virus	1.50467	670	No
SSK1	YLR006C	Cytoplasmic response regulator, part of a two-component signal transducer that mediates osmosensing via a phosphorelay mechanism; dephosphorylated form is degraded by the ubiquitin-proteasome system; potential Cdc28p substrate	1.50467	671	No
IWR1	YDL115C	Protein of unknown function, deletion causes hypersensitivity to the K1 killer toxin	1.50333	672	No
ALG6	YOR002W	Alpha 1,3 glucosyltransferase, involved in transfer of oligosaccharides from dolichyl pyrophosphate to asparagine residues of proteins during N-linked protein glycosylation; mutations in human ortholog are associated with disease	1.50233	673	No
LPE10	YPL060W	Mitochondrial inner membrane magnesium transporter, involved in maintenance of magnesium concentrations inside mitochondria; indirectly affects splicing of group II introns; functionally and structurally related to Mrs2p	1.502	674	No
ALY2	YJL084C	Protein proposed to regulate the endocytosis of plasma membrane proteins; interacts with the cyclin Pcl7p and ubiquitin ligase Rsp5p; phosphorylated by the cyclin-CDK complex, Pcl7p-Pho85p; mRNA is cell cycle regulated, peaking in M phase	1.502	675	No
YCR100C	YCR100C	Putative protein of unknown function	1.50167	676	No
RPP1B	YDL130W	Ribosomal protein P1 beta, component of the ribosomal stalk, which is involved in interaction of translational elongation factors with ribosome; accumulation is regulated by phosphorylation and interaction with the P2 stalk component	1.50133	677	Yes
COX9	YDL067C	Subunit VIIa of cytochrome c oxidase, which is the terminal member of the mitochondrial inner membrane electron transport chain	1.50133	678	No
TSC10	YBR265W	3-ketosphinganine reductase, catalyzes the second step in phytosphingosine synthesis, essential for growth in the absence of exogenous dihydrosphingosine or phytosphingosine, member of short chain dehydrogenase/reductase protein family	1.5	679	No
YPL225W	YPL225W	Protein of unknown function that may interact with ribosomes, based on co-purification experiments; green fluorescent protein (GFP)-fusion protein localizes to the cytoplasm	1.5	680	No
MET2	YNL277W	L-homoserine-O-acetyltransferase, catalyzes the conversion of homoserine to O-acetyl homoserine which is the first step of the methionine biosynthetic pathway	1.5	681	No
TWF1	YGR080W	Twinfilin, highly conserved actin monomer-sequestering protein involved in regulation of the cortical actin cytoskeleton, composed of two cofilin-like regions, localizes actin monomers to sites of rapid filament assembly	1.5	682	No
YLR434C	YLR434C	Dubious open reading frame unlikely to encode a protein, based on available experimental and comparative sequence data; partially overlaps the verified ORF TSR2/YLR435W	1.5	683	No
NIT2	YJL126W	Nit protein, one of two proteins in S. cerevisiae with similarity to the Nit domain of NitFhit from fly and worm and to the mouse and human Nit protein which interacts with the Fhit tumor suppressor; nitrilase superfamily member	1.49967	684	No
CAF4	YKR036C	WD40 repeat-containing protein associated with the CCR4-NOT complex, interacts in a Ccr4p-dependent manner with Ssn2p; also interacts with Fis1p, Mdv1p and Dnm1p and plays a role in mitochondrial fission	1.49867	685	No
PET130	YJL023C	Protein required for respiratory growth; the authentic, non-tagged protein is detected in highly purified mitochondria in high-throughput studies	1.49867	686	No
YPL247C	YPL247C	Putative protein of unknown function; green fluorescent protein (GFP)-fusion protein localizes to the cytoplasm and nucleus; similar to the petunia WD repeat protein an11; overexpression causes a cell cycle delay or arrest	1.498	687	No
LCB4	YOR171C	Sphingoid long-chain base kinase, responsible for synthesis of long-chain base phosphates, which function as signaling molecules, regulates synthesis of ceramide from exogenous long-chain bases, localizes to the Golgi and late endosomes	1.49733	688	No
ATP20	YPR020W	Subunit g of the mitochondrial F1F0 ATP synthase; reversibly phosphorylated on two residues; unphosphorylated form is required for dimerization of the ATP synthase complex	1.496	689	No
COX18	YGR062C	Mitochondrial integral inner membrane protein required for membrane insertion of C-terminus of Cox2p; interacts genetically and physically with Mss2p and Pnt1p; similar to S. cerevisiae Oxa1, N. crassa Oxa2p, and E. coli YidC	1.496	690	No
CTF8	YHR191C	Subunit of a complex with Ctf18p that shares some subunits with Replication Factor C and is required for sister chromatid cohesion	1.496	691	No
REX3	YLR107W	RNA exonuclease; required for maturation of the RNA component of RNase MRP; functions redundantly with Rnh70p and Rex2p in processing of U5 snRNA and RNase P RNA; member of RNase D family of exonucleases	1.495	692	Yes
SLY41	YOR307C	Protein involved in ER-to-Golgi transport	1.493	693	No
GPX2	YBR244W	Phospholipid hydroperoxide glutathione peroxidase induced by glucose starvation that protects cells from phospholipid hydroperoxides and nonphospholipid peroxides during oxidative stress	1.493	694	No
PCI8	YIL071C	Possible shared subunit of Cop9 signalosome (CSN) and eIF3, binds eIF3b subunit Prt1p, has possible dual functions in transcriptional and translational control, contains a PCI (Proteasome-COP9 signalosome (CSN)-eIF3) domain	1.493	695	No
VCX1	YDL128W	Vacuolar H+/Ca2+ exchanger involved in control of cytosolic Ca2+ concentration; has similarity to sodium/calcium exchangers, including the bovine Na+/Ca2+,K+ antiporter	1.49067	696	No
YGL262W	YGL262W	Putative protein of unknown function; null mutant displays elevated sensitivity to expression of a mutant huntingtin fragment or of alpha-synuclein; YGL262W is not an essential gene	1.49067	697	No
EMC1	YCL045C	Member of a transmembrane complex required for efficient folding of proteins in the ER; null mutant displays induction of the unfolded protein response; interacts with Gal80p	1.49033	698	No
YJR149W	YJR149W	Putative protein of unknown function; green fluorescent protein (GFP)-fusion protein localizes to the cytoplasm	1.48733	699	No
CET1	YPL228W	Beta (RNA 5'-triphosphatase) subunit of the mRNA capping enzyme, a heterodimer (the other subunit is CEG1, a guanylyltransferase) involved in adding the 5' cap to mRNA; the mammalian enzyme is a single bifunctional polypeptide	1.48684	700	Yes
RHO4	YKR055W	Non-essential small GTPase of the Rho/Rac subfamily of Ras-like proteins, likely to be involved in the establishment of cell polarity	1.48633	701	No
YMR046C	YMR046C	Retrotransposon TYA Gag gene co-transcribed with TYB Pol; translated as TYA or TYA-TYB polyprotein; Gag is a nucleocapsid protein that is the structural constituent of virus-like particles (VLPs); similar to retroviral Gag	1.486	702	Yes
RAM1	YDL090C	Beta subunit of the CAAX farnesyltransferase (FTase) that prenylates the a-factor mating pheromone and Ras proteins; required for the membrane localization of Ras proteins and a-factor; homolog of the mammalian FTase beta subunit	1.486	703	No
ORM1	YGR038W	Evolutionarily conserved protein with similarity to Orm2p, required for resistance to agents that induce the unfolded protein response; human ortholog is located in the endoplasmic reticulum	1.486	704	No
GSG1	YDR108W	Subunit of TRAPP (transport protein particle), a multi-subunit complex involved in targeting and/or fusion of ER-to-Golgi transport vesicles with their acceptor compartment; protein has late meiotic role, following DNA replication	1.48533	705	No
RPL26B	YGR034W	Protein component of the large (60S) ribosomal subunit, nearly identical to Rpl26Ap and has similarity to E. coli L24 and rat L26 ribosomal proteins; binds to 5.8S rRNA	1.485	706	Yes
YGR016W	YGR016W	Putative protein of unknown function	1.485	707	No
TMA17	YDL110C	Protein of unknown function that associates with ribosomes; heterozygous deletion demonstrated increases in chromosome instability in a rad9 deletion background; protein abundance is decreased upon intracellular iron depletion	1.48433	708	Yes
FAT1	YBR041W	Fatty acid transporter and very long-chain fatty acyl-CoA synthetase, may form a complex with Faa1p or Faa4p that imports and activates exogenous fatty acids	1.484	709	No
CLB1	YGR108W	B-type cyclin involved in cell cycle progression; activates Cdc28p to promote the transition from G2 to M phase; accumulates during G2 and M, then targeted via a destruction box motif for ubiquitin-mediated degradation by the proteasome	1.482	710	No
YGR025W	YGR025W	Dubious open reading frame unlikely to encode a functional protein, based on available experimental and comparative sequence data	1.482	711	No
IBA57	YJR122W	Mitochondrial matrix protein involved in the incorporation of iron-sulfur clusters into mitochondrial aconitase-type proteins; activates the radical-SAM family members Bio2p and Lip5p; interacts with Ccr4p in the two-hybrid system	1.48167	712	No
YGR131W	YGR131W	Protein of unknown function; expression induced in response to ketoconazole; promoter region contains a sterol regulatory element motif, which has been identified as a Upc2p-binding site	1.48067	713	No
YCR022C	YCR022C	Dubious open reading frame unlikely to encode a protein, based on available experimental and comparative sequence data; YCR022C is not an essential gene	1.47967	714	No
HEM4	YOR278W	Uroporphyrinogen III synthase, catalyzes the conversion of hydroxymethylbilane to uroporphyrinogen III, the fourth step in heme biosynthesis; deficiency in the human homolog can result in the disease congenital erythropoietic porphyria	1.47933	715	No
PIN3	YPR154W	Protein that induces appearance of [PIN+] prion when overproduced	1.479	716	No
SPO16	YHR153C	Meiosis-specific protein involved in synaptonemal complex assembly; implicated in regulation of crossover formation; required for sporulation	1.479	717	No
ECM1	YAL059W	Protein of unknown function, localized in the nucleoplasm and the nucleolus, genetically interacts with MTR2 in 60S ribosomal protein subunit export	1.47867	718	No
AHC2	YCR082W	Protein of unknown function, putative transcriptional regulator; proposed to be a Ada Histone acetyltransferase complex component; GFP tagged protein is localized to the cytoplasm and nucleus	1.47833	719	No
YOR366W	YOR366W	Dubious open reading frame unlikely to encode a protein, based on available experimental and comparative sequence data; partially overlaps the uncharacterized ORF YOR365C	1.478	720	No
NSG1	YHR133C	Protein involved in regulation of sterol biosynthesis; specifically stabilizes Hmg2p, one of two HMG-CoA isoenzymes that catalyze the rate-limiting step in sterol biosynthesis; homolog of mammalian INSIG proteins	1.47633	721	No
YOL014W	YOL014W	Putative protein of unknown function	1.47633	722	No
RGA2	YDR379W	GTPase-activating protein for the polarity-establishment protein Cdc42p; implicated in control of septin organization, pheromone response, and haploid invasive growth; regulated by Pho85p and Cdc28p	1.476	723	No
COX7	YMR256C	Subunit VII of cytochrome c oxidase, which is the terminal member of the mitochondrial inner membrane electron transport chain	1.47567	724	No
TRP1	YDR007W	Phosphoribosylanthranilate isomerase that catalyzes the third step in tryptophan biosynthesis; in 2004, the sequence of TRP1 from strain S228C was updated by changing the previously annotated internal STOP (TAA) to serine (TCA)	1.47567	725	No
MTC6	YHR151C	Protein of unknown function; mtc6 is synthetically sick with cdc13-1	1.47533	726	No
MTM1	YGR257C	Mitochondrial protein of the mitochondrial carrier family, involved in activating mitochondrial Sod2p probably by facilitating insertion of an essential manganese cofactor	1.475	727	No
APN2	YBL019W	Class II abasic (AP) endonuclease involved in repair of DNA damage; homolog of human HAP1 and E. coli exoIII	1.47467	728	No
EGD2	YHR193C	Alpha subunit of the heteromeric nascent polypeptide-associated complex (NAC) involved in protein sorting and translocation, associated with cytoplasmic ribosomes	1.47467	729	No
AHT1	YHR093W	Dubious open reading frame, unlikely to encode a protein; not conserved in closely related Saccharomyces species; multicopy suppressor of glucose transport defects, likely due to the presence of an HXT4 regulatory element in the region	1.47467	730	No
YHR045W	YHR045W	Putative protein of unknown function; green fluorescent protein (GFP)-fusion protein localizes to the endoplasmic reticulum	1.474	731	No
YHR214W	YHR214W	Putative protein of unknown function; predicted to be a glycosylphosphatidylinositol-modified (GPI) protein	1.47367	732	No
YOL118C	YOL118C	Dubious open reading frame unlikely to encode a functional protein, based on available experimental and comparative sequence data	1.47267	733	No
QCR9	YGR183C	Subunit 9 of the ubiquinol cytochrome-c reductase complex, which is a component of the mitochondrial inner membrane electron transport chain; required for electron transfer at the ubiquinol oxidase site of the complex	1.47233	734	No
YPR089W	YPR089W	Protein of unknown function; exhibits genetic interaction with ERG11 and protein-protein interaction with Hsp82p	1.47233	735	No
YLR050C	YLR050C	Putative protein of unknown function; green fluorescent protein (GFP)-fusion protein localizes to the endoplasmic reticulum; YLR050C is not an essential gene	1.472	736	No
YTA6	YPL074W	Putative ATPase of the CDC48/PAS1/SEC18 (AAA) family, localized to the cortex of mother cells but not to daughter cells	1.47133	737	No
YCL076W	YCL076W	Dubious open reading frame unlikely to encode a protein, based on available experimental and comparative sequence data	1.47133	738	No
YDL038C	YDL038C	Merged open reading frame, does not encode a discrete protein	1.47	739	No
NCP1	YHR042W	NADP-cytochrome P450 reductase; involved in ergosterol biosynthesis; associated and coordinately regulated with Erg11p	1.469	740	No
OAC1	YKL120W	Mitochondrial inner membrane transporter, transports oxaloacetate, sulfate, thiosulfate, and isopropylmalate; member of the mitochondrial carrier family	1.469	741	No
CYC7	YEL039C	Cytochrome c isoform 2, expressed under hypoxic conditions; electron carrier of the mitochondrial intermembrane space that transfers electrons from ubiquinone-cytochrome c oxidoreductase to cytochrome c oxidase during cellular respiration	1.46833	742	No
DCD1	YHR144C	Deoxycytidine monophosphate (dCMP) deaminase required for dCTP and dTTP synthesis; expression is NOT cell cycle regulated	1.46733	743	No
MET16	YPR167C	3'-phosphoadenylsulfate reductase, reduces 3'-phosphoadenylyl sulfate to adenosine-3',5'-bisphosphate and free sulfite using reduced thioredoxin as cosubstrate, involved in sulfate assimilation and methionine metabolism	1.46733	744	No
CPR2	YHR057C	Peptidyl-prolyl cis-trans isomerase (cyclophilin), catalyzes the cis-trans isomerization of peptide bonds N-terminal to proline residues; has a potential role in the secretory pathway	1.46667	745	No
SPP1	YPL138C	Subunit of COMPASS (Set1C), a complex which methylates histone H3 on lysine 4 and is required in telomeric transcriptional silencing; interacts with Orc2p; PHD finger domain protein similar to human CGBP, an unmethylated CpG binding protein	1.46633	746	No
JJJ2	YJL162C	Protein of unknown function, contains a J-domain, which is a region with homology to the E. coli DnaJ protein	1.466	747	No
PUT4	YOR348C	Proline permease, required for high-affinity transport of proline; also transports the toxic proline analog azetidine-2-carboxylate (AzC); PUT4 transcription is repressed in ammonia-grown cells	1.465	748	No
RNH70	YGR276C	3'-5' exoribonuclease; required for maturation of 3' ends of 5S rRNA and tRNA-Arg3 from dicistronic transcripts	1.46467	749	No
MEU1	YLR017W	Methylthioadenosine phosphorylase (MTAP), catalyzes the initial step in the methionine salvage pathway; affects polyamine biosynthesis through regulation of ornithine decarboxylase (Spe1p) activity; regulates ADH2 gene expression	1.46433	750	No
CAP2	YIL034C	Beta subunit of the capping protein (CP) heterodimer (Cap1p and Cap2p) which binds to the barbed ends of actin filaments preventing further polymerization; localized predominantly to cortical actin patches	1.464	751	No
MAM33	YIL070C	Acidic protein of the mitochondrial matrix involved in oxidative phosphorylation; related to the human complement receptor gC1q-R	1.46367	752	No
HTD2	YHR067W	Mitochondrial 3-hydroxyacyl-thioester dehydratase involved in fatty acid biosynthesis, required for respiratory growth and for normal mitochondrial morphology	1.46333	753	No
TRM10	YOL093W	tRNA methyltransferase, methylates the N-1 position of guanosine in tRNAs	1.463	754	Yes
RFC5	YBR087W	Subunit of heteropentameric Replication factor C (RF-C), which is a DNA binding protein and ATPase that acts as a clamp loader of the proliferating cell nuclear antigen (PCNA) processivity factor for DNA polymerases delta and epsilon	1.46167	755	No
PEX14	YGL153W	Peroxisomal membrane peroxin that is a central component of the peroxisomal protein import machinery; interacts with both PTS1 (Pex5p) and PTS2 (Pex7p), peroxisomal matrix protein signal recognition factors and membrane receptor Pex13p	1.46133	756	No
YIL067C	YIL067C	Uncharacterized protein of unknown function	1.46033	757	No
ALG9	YNL219C	Mannosyltransferase, involved in N-linked glycosylation; catalyzes the transfer of mannose from Dol-P-Man to lipid-linked oligosaccharides; mutation of the human ortholog causes type 1 congenital disorders of glycosylation	1.46033	758	No
YOL160W	YOL160W	Dubious open reading frame unlikely to encode a protein, based on available experimental and comparative sequence data	1.45967	759	No
FAA3	YIL009W	Long chain fatty acyl-CoA synthetase, has a preference for C16 and C18 fatty acids; green fluorescent protein (GFP)-fusion protein localizes to the cell periphery	1.459	760	No
RSM27	YGR215W	Mitochondrial ribosomal protein of the small subunit	1.458	761	No
LSM12	YHR121W	Protein of unknown function that may function in RNA processing; interacts with Pbp1p and Pbp4p and associates with ribosomes; contains an RNA-binding LSM domain and an AD domain; GFP-fusion protein is induced by the DNA-damaging agent MMS	1.458	762	Yes
VHS3	YOR054C	Functionally redundant (see also SIS2) inhibitory subunit of Ppz1p, a PP1c-related ser/thr protein phosphatase Z isoform; synthetically lethal with sis2; putative phosphopantothenoylcysteine decarboxylase involved in coenzyme A biosynthesis	1.458	763	No
GYP6	YJL044C	GTPase-activating protein (GAP) for the yeast Rab family member, Ypt6p; involved in vesicle mediated protein transport	1.4575	764	No
YHR182W	YHR182W	Putative protein of unknown function; green fluorescent protein (GFP)-fusion protein localizes to the cell periphery and cytoplasm	1.456	765	No
YIL172C	YIL172C	Putative protein of unknown function with similarity to glucosidases; green fluorescent protein (GFP)-fusion protein localizes to the cytoplasm	1.45567	766	No
YHR022C	YHR022C	Putative protein of unknown function; YHR022C is not an essential gene	1.45567	767	No
YHR113W	YHR113W	Cytoplasmic aspartyl aminopeptidase; cleaves unblocked N-terminal acidic amino acid residues from peptide substrates; forms a 12 subunit homo-oligomeric complex; M18 metalloprotease family member; may interact with ribosomes	1.455	768	No
TIR3	YIL011W	Cell wall mannoprotein of the Srp1p/Tip1p family of serine-alanine-rich proteins; expressed under anaerobic conditions and required for anaerobic growth	1.455	769	No
TYW3	YGL050W	tRNA methyltransferase required for synthesis of wybutosine, a modified guanosine found at the 3'-position adjacent to the anticodon of phenylalanine tRNA which supports reading frame maintenance by stabilizing codon-anticodon interactions	1.45467	770	Yes
YPR204W	YPR204W	Helicase-like protein encoded within the telomeric Y' element	1.45433	771	No
ENP2	YGR145W	Essential nucleolar protein of unknown function; contains WD repeats, interacts with Mpp10p and Bfr2p, and has homology to Spb1p	1.45333	772	No
YPL162C	YPL162C	Putative protein of unknown function; green fluorescent protein (GFP)-fusion protein localizes to the membrane of vacuole with cell cycle-correlated morphology	1.45267	773	No
MFA2	YNL145W	Mating pheromone a-factor, made by a cells; interacts with alpha cells to induce cell cycle arrest and other responses leading to mating; biogenesis involves C-terminal modification, N-terminal proteolysis, and export; also encoded by MFA1	1.452	774	No
CYS4	YGR155W	Cystathionine beta-synthase, catalyzes synthesis of cystathionine from serine and homocysteine, the first committed step in cysteine biosynthesis; responsible for hydrogen sulfide generation; mutations in human ortholog cause homocystinuria	1.45167	775	No
YLR426W	YLR426W	Putative protein of unknown function; the authentic, non-tagged protein is detected in highly purified mitochondria in high-throughput studies; proposed to be involved in resistance to mechlorethamine and streptozotocin	1.45	776	No
TOS8	YGL096W	Homeodomain-containing protein and putative transcription factor found associated with chromatin; target of SBF transcription factor; induced during meiosis and under cell-damaging conditions; similar to Cup9p transcription factor	1.45	777	No
LDB18	YLL049W	Protein of unknown function; required for nuclear migration; null mutant shows a reduced affinity for the alcian blue dye suggesting a decreased net negative charge of the cell surface	1.44967	778	No
GRE1	YPL223C	Hydrophilin of unknown function; stress induced (osmotic, ionic, oxidative, heat shock and heavy metals); regulated by the HOG pathway	1.44967	779	No
MRPL8	YJL063C	Mitochondrial ribosomal protein of the large subunit	1.449	780	Yes
ENT2	YLR206W	Epsin-like protein required for endocytosis and actin patch assembly and functionally redundant with Ent1p; contains clathrin-binding motif at C-terminus	1.449	781	No
MCH4	YOL119C	Protein with similarity to mammalian monocarboxylate permeases, which are involved in transport of monocarboxylic acids across the plasma membrane; mutant is not deficient in monocarboxylate transport	1.44767	782	No
EMC2	YJR088C	Member of a transmembrane complex required for efficient folding of proteins in the ER; null mutant displays induction of the unfolded protein response	1.44767	783	No
PAN5	YHR063C	2-dehydropantoate 2-reductase, part of the pantothenic acid pathway, structurally homologous to E. coli panE	1.447	784	No
ZPS1	YOL154W	Putative GPI-anchored protein; transcription is induced under low-zinc conditions, as mediated by the Zap1p transcription factor, and at alkaline pH	1.447	785	No
PFS1	YHR185C	Sporulation protein required for prospore membrane formation at selected spindle poles, ensures functionality of all four spindle pole bodies during meiosis II; not required for meiotic recombination or meiotic chromosome segregation	1.446	786	No
VPS28	YPL065W	Component of the ESCRT-I complex (Stp22p, Srn2p, Vps28p, and Mvb12p), which is involved in ubiquitin-dependent sorting of proteins into the endosome; conserved C-terminal domain interacts with ESCRT-III subunit Vps20p	1.446	787	No
ISF1	YMR081C	Serine-rich, hydrophilic protein with similarity to Mbr1p; overexpression suppresses growth defects of hap2, hap3, and hap4 mutants; expression is under glucose control; cotranscribed with NAM7 in a cyp1 mutant	1.44451	788	Yes
YBR032W	YBR032W	Dubious open reading frame unlikely to encode a protein, based on experimental and comparative sequence data	1.44433	789	No
YDL063C	YDL063C	Putative protein of unknown function; green fluorescent protein (GFP)-fusion protein localizes to the cytoplasm and nucleus; predicted to be involved in ribosome biogenesis	1.44433	790	No
HFI1	YPL254W	Adaptor protein required for structural integrity of the SAGA complex, a histone acetyltransferase-coactivator complex that is involved in global regulation of gene expression through acetylation and transcription functions	1.44433	791	No
YPR053C	YPR053C	Dubious open reading frame unlikely to encode a protein, based on available experimental and comparative sequence data; partially overlaps verified gene NHP6A/YPR052C	1.44433	792	No
NOP13	YNL175C	Nucleolar protein found in preribosomal complexes; contains an RNA recognition motif (RRM)	1.44286	793	Yes
THO1	YER063W	Conserved nuclear RNA-binding protein; specifically binds to transcribed chromatin in a THO- and RNA-dependent manner, genetically interacts with shuttling hnRNP NAB2; overproduction suppresses transcriptional defect caused by hpr1 mutation	1.44286	794	Yes
SYM1	YLR251W	Protein required for ethanol metabolism; induced by heat shock and localized to the inner mitochondrial membrane; homologous to mammalian peroxisomal membrane protein Mpv17	1.4425	795	No
FUN14	YAL008W	Mitochondrial protein of unknown function	1.44233	796	No
SPS100	YHR139C	Protein required for spore wall maturation; expressed during sporulation; may be a component of the spore wall; expression also induced in cells treated with the mycotoxin patulin	1.43967	797	No
GPM2	YDL021W	Homolog of Gpm1p phosphoglycerate mutase, which converts 3-phosphoglycerate to 2-phosphoglycerate in glycolysis; may be non-functional derivative of a gene duplication event	1.43967	798	No
CTR9	YOL145C	Component of the Paf1p complex, which is a large complex that binds to and modulates the activity of RNA polymerase II and is required for expression of a subset of genes, including cyclin genes; contains TPR repeats	1.43933	799	No
YPR011C	YPR011C	Putative transporter, member of the mitochondrial carrier family; the authentic, non-tagged protein is detected in highly purified mitochondria in high-throughput studies	1.43867	800	No
YOR343C	YOR343C	Dubious open reading frame unlikely to encode a functional protein, based on available experimental and comparative sequence data	1.43867	801	No
SVP26	YHR181W	Integral membrane protein of the early Golgi apparatus and endoplasmic reticulum, involved in COP II vesicle transport; may also function to promote retention of proteins in the early Golgi compartment	1.43867	802	No
SEC66	YBR171W	Non-essential subunit of Sec63 complex (Sec63p, Sec62p, Sec66p and Sec72p); with Sec61 complex, Kar2p/BiP and Lhs1p forms a channel competent for SRP-dependent and post-translational SRP-independent protein targeting and import into the ER	1.43833	803	No
PDC6	YGR087C	Minor isoform of pyruvate decarboxylase, decarboxylates pyruvate to acetaldehyde, involved in amino acid catabolism; transcription is glucose- and ethanol-dependent, and is strongly induced during sulfur limitation	1.4375	804	No
NHP6A	YPR052C	High-mobility group non-histone chromatin protein, functionally redundant with Nhp6Bp; homologous to mammalian high mobility group proteins 1 and 2; acts to recruit transcription factor Rcs1p to certain promoters	1.436	805	No
SYF1	YDR416W	Component of the spliceosome complex involved in pre-mRNA splicing; involved in regulation of cell cycle progression; similar to Drosophila crooked neck protein	1.43588	806	Yes
MIA40	YKL195W	Essential protein of the mitochondrial intermembrane space (IMS); promotes retention of newly imported proteins; may do so by stabilizing client protein folding as part of a disulfide relay system or transferring metal to client proteins	1.435	807	No
PTK1	YKL199C	Putative serine/threonine protein kinase that regulates spermine uptake; involved in polyamine transport; possible mitochondrial protein	1.43467	808	No
YJR146W	YJR146W	Dubious open reading frame unlikely to encode a protein, based on available experimental and comparative sequence data; partially overlaps the verified gene HMS2	1.43433	809	No
BIT2	YBR270C	Subunit of TORC2, a membrane-associated complex that regulates actin cytoskeletal dynamics during polarized growth and cell wall integrity; interacts with Slm1p and Slm2p, homologous PH domain-containing TORC2 substrates; similar to Bit61p	1.434	810	No
MAK10	YEL053C	Non-catalytic subunit of N-terminal acetyltransferase of the NatC type, required for replication of dsRNA virus; expression is glucose-repressible	1.43367	811	No
ULA1	YPL003W	Protein that acts together with Uba3p to activate Rub1p before its conjugation to proteins (neddylation), which may play a role in protein degradation	1.43333	812	No
NTR2	YKR022C	Essential protein that forms a dimer with Ntr1p; also forms a trimer, with Ntr2p and the DExD/H-box RNA helicase Prp43p, that is involved in spliceosome disassembly	1.432	813	No
SWC7	YLR385C	Protein of unknown function, component of the Swr1p complex that incorporates Htz1p into chromatin	1.431	814	No
YHR214W-A	YHR214W-A	Dubious open reading frame unlikely to encode a protein, based on experimental and comparative sequence data; similar to the fungal specific protein encoded by YAR068W; induced by zinc deficiency	1.431	815	No
RPS2	YGL123W	Protein component of the small (40S) subunit, essential for control of translational accuracy; phosphorylation by C-terminal domain kinase I (CTDK-I) enhances translational accuracy; similar to E. coli S5 and rat S2 ribosomal proteins	1.43056	816	Yes
GPB2	YAL058C-A	Multistep regulator of cAMP-PKA signaling; inhibits PKA downstream of Gpa2p and Cyr1p, thereby increasing cAMP dependency; inhibits Ras activity through direct interactions with Ira1p/2p; regulated by G-alpha protein Gpa2p; homolog of Gpb1p	1.42933	817	No
YLL053C	YLL053C	Putative protein; in the Sigma 1278B strain background YLL053C is contiguous with AQY2 which encodes an aquaporin	1.42933	818	No
PEX28	YHR150W	Peroxisomal integral membrane peroxin, involved in the regulation of peroxisomal size, number and distribution; genetic interactions suggest that Pex28p and Pex29p act at steps upstream of those mediated by Pex30p, Pex31p, and Pex32p	1.42833	819	No
GGC1	YDL198C	Mitochondrial GTP/GDP transporter, essential for mitochondrial genome maintenance; has a role in mitochondrial iron transport; member of the mitochondrial carrier family	1.42833	820	No
YJR038C	YJR038C	Dubious open reading frame unlikely to encode a functional protein, based on available experimental and comparative sequence data	1.42833	821	No
SOK2	YMR016C	Nuclear protein that plays a regulatory role in the cyclic AMP (cAMP)-dependent protein kinase (PKA) signal transduction pathway; negatively regulates pseudohyphal differentiation; homologous to several transcription factors	1.428	822	No
RCN1	YKL159C	Protein involved in calcineurin regulation during calcium signaling; has similarity to H. sapiens DSCR1 which is found in the Down Syndrome candidate region	1.428	823	No
YIL163C	YIL163C	Dubious open reading frame unlikely to encode a functional protein, based on available experimental and comparative sequence data	1.428	824	No
PUT2	YHR037W	Delta-1-pyrroline-5-carboxylate dehydrogenase, nuclear-encoded mitochondrial protein involved in utilization of proline as sole nitrogen source; deficiency of the human homolog causes HPII, an autosomal recessive inborn error of metabolism	1.42667	825	No
MBA1	YBR185C	Protein involved in assembly of mitochondrial respiratory complexes; may act as a receptor for proteins destined for export from the mitochondrial matrix to the inner membrane	1.42667	826	No
ATG10	YLL042C	Conserved E2-like conjugating enzyme that mediates formation of the Atg12p-Atg5p conjugate, which is a critical step in autophagy	1.42633	827	No
MF(ALPHA)2	YGL089C	Mating pheromone alpha-factor, made by alpha cells; interacts with mating type a cells to induce cell cycle arrest and other responses leading to mating; also encoded by MF(ALPHA)1, which is more highly expressed than MF(ALPHA)2	1.426	828	No
MET7	YOR241W	Folylpolyglutamate synthetase, catalyzes extension of the glutamate chains of the folate coenzymes, required for methionine synthesis and for maintenance of mitochondrial DNA	1.42567	829	No
MNT3	YIL014W	Alpha-1,3-mannosyltransferase, adds the fourth and fifth alpha-1,3-linked mannose residues to O-linked glycans during protein O-glycosylation	1.425	830	No
HSP33	YOR391C	Possible chaperone and cysteine protease with similarity to E. coli Hsp31 and S. cerevisiae Hsp31p, Hsp32p, and Sno4p; member of the DJ-1/ThiJ/PfpI superfamily, which includes human DJ-1 involved in Parkinson's disease	1.425	831	No
PMU1	YKL128C	Putative phosphomutase, contains a region homologous to the active site of phosphomutases; overexpression suppresses the histidine auxotrophy of an ade3 ade16 ade17 triple mutant and the temperature sensitivity of a tps2 mutant	1.42333	832	No
MEP1	YGR121C	Ammonium permease; belongs to a ubiquitous family of cytoplasmic membrane proteins that transport only ammonium (NH4+); expression is under the nitrogen catabolite repression regulation	1.42333	833	No
ISA2	YPR067W	Protein required for maturation of mitochondrial and cytosolic Fe/S proteins, localizes to the mitochondrial intermembrane space, overexpression of ISA2 suppresses grx5 mutations	1.42333	834	No
ERF2	YLR246W	Subunit of a palmitoyltransferase, composed of Erf2p and Shr5p, that adds a palmitoyl lipid moiety to heterolipidated substrates such as Ras1p and Ras2p through a thioester linkage; mutants partially mislocalize Ras2p to the vacuole	1.423	835	No
YBR239C	YBR239C	Putative protein of unknown function; GFP-fusion protein localizes to the cytoplasm and nucleus; null mutation affects periodicity of transcriptional and metabolic oscillation; plays a role in restricting Ty1 transposition	1.423	836	Yes
GIC2	YDR309C	Redundant rho-like GTPase Cdc42p effector; homolog of Gic1p; involved in initiation of budding and cellular polarization; interacts with Cdc42p via the Cdc42/Rac-interactive binding (CRIB) domain and with PI(4,5)P2 via a polybasic region	1.42267	837	No
MEF1	YLR069C	Mitochondrial elongation factor involved in translational elongation	1.42233	838	No
PSY1	YKL076C	Dubious open reading frame, unlikely to encode a protein; not conserved in closely related Saccharomyces species; 69% of ORF overlaps the uncharacterized ORF YKL075C	1.42233	839	No
VMA7	YGR020C	Subunit F of the eight-subunit V1 peripheral membrane domain of vacuolar H+-ATPase (V-ATPase), an electrogenic proton pump found throughout the endomembrane system; required for the V1 domain to assemble onto the vacuolar membrane	1.422	840	No
BAT1	YHR208W	Mitochondrial branched-chain amino acid aminotransferase, homolog of murine ECA39; highly expressed during logarithmic phase and repressed during stationary phase	1.42133	841	No
MRP2	YPR166C	Mitochondrial ribosomal protein of the small subunit	1.42105	842	Yes
RPL17B	YJL177W	Protein component of the large (60S) ribosomal subunit, nearly identical to Rpl17Ap and has similarity to E. coli L22 and rat L17 ribosomal proteins	1.42105	843	Yes
POP6	YGR030C	Subunit of both RNase MRP, which cleaves pre-rRNA, and nuclear RNase P, which cleaves tRNA precursors to generate mature 5' ends	1.42105	844	Yes
NUP57	YGR119C	Nucleoporin, essential subunit of the nuclear pore complex (NPC), functions as the organizing center of an NPC subcomplex containing Nsp1p, Nup49p, Nup57p, and Nic96p	1.42	845	No
PEX32	YBR168W	Peroxisomal integral membrane protein, involved in negative regulation of peroxisome size; partially functionally redundant with Pex31p; genetic interactions suggest action at a step downstream of steps mediated by Pex28p and Pex29p	1.41933	846	No
YHR095W	YHR095W	Dubious open reading frame unlikely to encode a functional protein, based on available experimental and comparative sequence data	1.419	847	No
DUR3	YHL016C	Plasma membrane transporter for both urea and polyamines, expression is highly sensitive to nitrogen catabolite repression and induced by allophanate, the last intermediate of the allantoin degradative pathway	1.41867	848	No
SYC1	YOR179C	Subunit of the APT subcomplex of cleavage and polyadenylation factor, may have a role in 3' end formation of both polyadenylated and non-polyadenylated RNAs	1.41833	849	Yes
YPL283W-A	YPL283W-A	Identified by gene-trapping, microarray-based expression analysis, and genome-wide homology searching	1.41833	850	No
YDL177C	YDL177C	Putative protein of unknown function; similar to the mouse IMPACT gene; YDL177C is not an essential gene	1.41667	851	No
SLK19	YOR195W	Kinetochore-associated protein required for normal segregation of chromosomes in meiosis and mitosis; component of the FEAR regulatory network, which promotes Cdc14p release from the nucleolus during anaphase; potential Cdc28p substrate	1.41667	852	No
COG1	YGL223C	Essential component of the conserved oligomeric Golgi complex (Cog1p through Cog8p), a cytosolic tethering complex that functions in protein trafficking to mediate fusion of transport vesicles to Golgi compartments	1.41633	853	No
YTH1	YPR107C	Essential RNA-binding component of cleavage and polyadenylation factor, contains five zinc fingers; required for pre-mRNA 3'-end processing and polyadenylation	1.41599	854	Yes
YGL010W	YGL010W	Putative protein of unknown function; YGL010W is not an essential gene	1.41567	855	No
CDC19	YAL038W	Pyruvate kinase, functions as a homotetramer in glycolysis to convert phosphoenolpyruvate to pyruvate, the input for aerobic (TCA cycle) or anaerobic (glucose fermentation) respiration	1.41533	856	No
THR1	YHR025W	Homoserine kinase, conserved protein required for threonine biosynthesis; expression is regulated by the GCN4-mediated general amino acid control pathway	1.41467	857	No
NNF1	YJR112W	Essential component of the MIND kinetochore complex (Mtw1p Including Nnf1p-Nsl1p-Dsn1p) which joins kinetochore subunits contacting DNA to those contacting microtubules; required for accurate chromosome segregation	1.41467	858	No
YKL023W	YKL023W	Putative protein of unknown function, predicted by computational methods to be involved in mRNA degradation; green fluorescent protein (GFP)-fusion protein localizes to the cytoplasm	1.414	859	No
CAX4	YGR036C	Dolichyl pyrophosphate (Dol-P-P) phosphatase with a luminally oriented active site in the ER, cleaves the anhydride linkage in Dol-P-P, required for Dol-P-P-linked oligosaccharide intermediate synthesis and protein N-glycosylation	1.414	860	No
TFA1	YKL028W	TFIIE large subunit, involved in recruitment of RNA polymerase II to the promoter, activation of TFIIH, and promoter opening	1.41367	861	No
ALG3	YBL082C	Dolichol-P-Man dependent alpha(1-3) mannosyltransferase, involved in the synthesis of dolichol-linked oligosaccharide donor for N-linked glycosylation of proteins	1.413	862	No
YLR280C	YLR280C	Dubious open reading frame unlikely to encode a functional protein, based on available experimental and comparative sequence data	1.41267	863	No
HOC1	YJR075W	Alpha-1,6-mannosyltransferase involved in cell wall mannan biosynthesis; subunit of a Golgi-localized complex that also contains Anp1p, Mnn9p, Mnn11p, and Mnn10p; identified as a suppressor of a cell lysis sensitive pkc1-371 allele	1.411	864	No
YBR053C	YBR053C	Putative protein of unknown function; induced by cell wall perturbation	1.41067	865	No
ENT4	YLL038C	Protein of unknown function, contains an N-terminal epsin-like domain; proposed to be involved in the trafficking of Arn1p in the absence of ferrichrome	1.41067	866	No
REC104	YHR157W	Protein involved in early stages of meiotic recombination; required for meiotic crossing over; forms a complex with Rec102p and Spo11p necessary during the initiation of recombination	1.41033	867	No
SPP381	YBR152W	mRNA splicing factor, component of U4/U6.U5 tri-snRNP; interacts genetically and physically with Prp38p	1.41029	868	Yes
UBS1	YBR165W	Ubiquitin-conjugating enzyme suppressor that functions as a general positive regulator of Cdc34p activity; nuclear protein that may represent a link between nucleocytoplasmic transport and ubiquitin ligase activity	1.41	869	No
THG1	YGR024C	tRNAHis guanylyltransferase, adds a guanosine residue to the 5' end of tRNAHis after transcription and RNase P cleavage; couples nuclear division and migration to cell budding and cytokinesis; essential enzyme conserved among eukaryotes	1.40967	870	Yes
YGL082W	YGL082W	Putative protein of unknown function; predicted prenylation/proteolysis target of Afc1p and Rce1p; green fluorescent protein (GFP)-fusion protein localizes to the cytoplasm and nucleus; YGL082W is not an essential gene	1.40967	871	No
YGL217C	YGL217C	Dubious open reading frame unlikely to encode a protein, based on available experimental and comparative sequence data; partially overlaps the verified ORF KIP3/YGL216W	1.40867	872	No
NRT1	YOR071C	High-affinity nicotinamide riboside transporter; also transports thiamine with low affinity; shares sequence similarity with Thi7p and Thi72p; proposed to be involved in 5-fluorocytosine sensitivity	1.40833	873	No
NOP10	YHR072W-A	Constituent of small nucleolar ribonucleoprotein particles containing H/ACA-type snoRNAs, which are required for pseudouridylation and processing of pre-18S rRNA	1.40789	874	Yes
SEF1	YBL066C	Putative transcription factor, has homolog in Kluyveromyces lactis	1.40767	875	No
PFK26	YIL107C	6-phosphofructo-2-kinase, inhibited by phosphoenolpyruvate and sn-glycerol 3-phosphate; has negligible fructose-2,6-bisphosphatase activity; transcriptional regulation involves protein kinase A	1.40733	876	No
RPT6	YGL048C	One of six ATPases of the 19S regulatory particle of the 26S proteasome involved in the degradation of ubiquitinated substrates; bound by ubiquitin-protein ligases Ubr1p and Ufd4p; localized mainly to the nucleus throughout the cell cycle	1.407	877	No
ATP10	YLR393W	Mitochondrial inner membrane protein required for assembly of the F0 sector of mitochondrial F1F0 ATP synthase, interacts genetically with ATP6	1.407	878	No
HPA2	YPR193C	Tetrameric histone acetyltransferase with similarity to Gcn5p, Hat1p, Elp3p, and Hpa3p; acetylates histones H3 and H4 in vitro and exhibits autoacetylation activity	1.40633	879	No
MSS2	YDL107W	Peripherally bound inner membrane protein of the mitochondrial matrix involved in membrane insertion of C-terminus of Cox2p, interacts genetically and physically with Cox18p	1.406	880	No
ACF4	YJR083C	Protein of unknown function, computational analysis of large-scale protein-protein interaction data suggests a possible role in actin cytoskeleton organization; potential Cdc28p substrate	1.40567	881	No
BIK1	YCL029C	Microtubule-associated protein, component of the interface between microtubules and kinetochore, involved in sister chromatid separation; essential in polyploid cells but not in haploid or diploid cells; ortholog of mammalian CLIP-170	1.40567	882	No
LSM8	YJR022W	Lsm (Like Sm) protein; forms heteroheptameric complex (with Lsm2p, Lsm3p, Lsm4p, Lsm5p, Lsm6p, and Lsm7p) that is part of spliceosomal U6 snRNP and is also implicated in processing of pre-tRNA, pre-snoRNA, and pre-rRNA	1.40513	883	Yes
YHR139C-A	YHR139C-A	Dubious open reading frame unlikely to encode a functional protein, based on available experimental and comparative sequence data	1.404	884	No
YLR252W	YLR252W	Dubious open reading frame unlikely to encode a protein, based on experimental and comparative sequence data; partially overlaps the verified gene SYM1, a mitochondrial protein involved in ethanol metabolism	1.404	885	No
YGR069W	YGR069W	Dubious open reading frame unlikely to encode a protein, based on available experimental and comparative sequence data	1.404	886	No
SEC4	YFL005W	Secretory vesicle-associated Rab GTPase essential for exocytosis; associates with the exocyst component Sec15p and may regulate polarized delivery of transport vesicles to the exocyst at the plasma membrane	1.403	887	No
RPB9	YGL070C	RNA polymerase II subunit B12.6; contacts DNA; mutations affect transcription start site; involved in telomere maintenance	1.403	888	No
ADH1	YOL086C	Alcohol dehydrogenase, fermentative isozyme active as homo- or heterotetramers; required for the reduction of acetaldehyde to ethanol, the last step in the glycolytic pathway	1.40267	889	No
YIL092W	YIL092W	Putative protein of unknown function; green fluorescent protein (GFP)-fusion protein localizes to the cytoplasm and to the nucleus	1.40267	890	No
AIM14	YGL160W	Putative protein of with similarity to iron/copper reductases (FRE1-8), possibly involved in iron homeostasis; may interact with ribosomes; null mutant displays elevated frequency of mitochondrial genome loss	1.40267	891	No
SCO1	YBR037C	Copper-binding protein of the mitochondrial inner membrane, required for cytochrome c oxidase activity and respiration; may function to deliver copper to cytochrome c oxidase; has similarity to thioredoxins	1.40267	892	No
TAT2	YOL020W	High affinity tryptophan and tyrosine permease, overexpression confers FK506 and FTY720 resistance	1.40267	893	No
HSP60	YLR259C	Tetradecameric mitochondrial chaperonin required for ATP-dependent folding of precursor polypeptides and complex assembly; prevents aggregation and mediates protein refolding after heat shock; role in mtDNA transmission; phosphorylated	1.40267	894	No
YJR087W	YJR087W	Dubious open reading frame, unlikely to encode a protein; not conserved in closely related Saccharomyces species; partially overlaps the verified gene STE18 and uncharacterized ORF YJR088C	1.4025	895	No
ASC1	YMR116C	G-protein beta subunit and guanine nucleotide dissociation inhibitor for Gpa2p; ortholog of RACK1 that inhibits translation; core component of the small (40S) ribosomal subunit; represses Gcn4p in the absence of amino acid starvation	1.40244	896	Yes
PEX2	YJL210W	RING-finger peroxin, peroxisomal membrane protein with a C-terminal zinc-binding RING domain, forms translocation subcomplex with Pex10p and Pex12p which functions in peroxisomal matrix protein import	1.40233	897	No
GPI19	YDR437W	Subunit of GPI-GlcNAc transferase involved in synthesis of N-acetylglucosaminyl phosphatidylinositol (GlcNAc-PI), which is the first intermediate in glycosylphosphatidylinositol (GPI) anchor synthesis, shares similarity with mammalian PIG-P	1.40233	898	No
SYH1	YPL105C	Protein of unknown function that may interact with ribosomes, based on co-purification experiments; authentic, non-tagged protein is detected in highly purified mitochondria in high-throughput studies	1.40233	899	No
IML3	YBR107C	Protein with a role in kinetochore function, localizes to the outer kinetochore in a Ctf19p-dependent manner, interacts with Chl4p and Ctf19p	1.40133	900	No
YHL046C	YHL046C	Putative protein of unknown function; expression is induced after ethanol shock; YHL046C is not an essential gene	1.40133	901	No
SAE3	YHR079C-A	Meiosis specific protein involved in DMC1-dependent meiotic recombination, forms heterodimer with Mei5p; proposed to be an assembly factor for Dmc1p	1.40067	902	No
STE18	YJR086W	G protein gamma subunit, forms a dimer with Ste4p to activate the mating signaling pathway, forms a heterotrimer with Gpa1p and Ste4p to dampen signaling; C-terminus is palmitoylated and farnesylated, which are required for normal signaling	1.40033	903	No
YKR045C	YKR045C	Putative protein of unknown function; epitope-tagged protein localizes to the cytoplasm	1.4	904	No
TAF10	YDR167W	Subunit (145 kDa) of TFIID and SAGA complexes, involved in RNA polymerase II transcription initiation and in chromatin modification	1.4	905	No
IST2	YBR086C	Plasma membrane protein that may be involved in osmotolerance, localizes to the mother cell in small-budded cells and to the bud in medium- and large-budded cells; mRNA is transported to the bud tip by an actomyosin-driven process	1.39967	906	No
SEC6	YIL068C	Essential 88kDa subunit of the exocyst complex, which mediates polarized targeting of secretory vesicles to active sites of exocytosis; dimeric form of Sec6p interacts with Sec9p in vitro and inhibits t-SNARE assembly	1.39933	907	No
VAC17	YCL063W	Phosphoprotein involved in vacuole inheritance; degraded in late M phase of the cell cycle; acts as a vacuole-specific receptor for myosin Myo2p	1.39933	908	No
YHR210C	YHR210C	Putative protein of unknown function; non-essential gene; highly expressed under anaeorbic conditions; sequence similarity to aldose 1-epimerases such as GAL10	1.39867	909	No
YNL200C	YNL200C	Putative protein of unknown function; the authentic, non-tagged protein is detected in highly purified mitochondria in high-throughput studies	1.39833	910	No
NIF3	YGL221C	Protein of unknown function, similar to Listeria monocytogenes major sigma factor (rpoD gene product); the authentic, non-tagged protein is detected in highly purified mitochondria in high-throughput studies	1.39833	911	No
PEX15	YOL044W	Phosphorylated tail-anchored type II integral peroxisomal membrane protein required for peroxisome biogenesis, cells lacking Pex15p mislocalize peroxisomal matrix proteins to cytosol, overexpression results in impaired peroxisome assembly	1.398	912	No
STF2	YGR008C	Protein involved in regulation of the mitochondrial F1F0-ATP synthase; Stf1p and Stf2p may act as stabilizing factors that enhance inhibitory action of the Inh1p protein	1.39667	913	No
OLE1	YGL055W	Delta(9) fatty acid desaturase, required for monounsaturated fatty acid synthesis and for normal distribution of mitochondria	1.396	914	No
YPL185W	YPL185W	Dubious open reading frame unlikely to encode a protein, based on available experimental and comparative sequence data; partially overlaps the verified gene UIP4/YPL186C	1.39567	915	No
RRP5	YMR229C	RNA binding protein with preference for single stranded tracts of U's involved in synthesis of both 18S and 5.8S rRNAs; component of both the ribosomal small subunit (SSU) processosome and the 90S preribosome	1.39533	916	Yes
EPT1	YHR123W	sn-1,2-diacylglycerol ethanolamine- and cholinephosphotranferase; not essential for viability	1.39533	917	Yes
HSM3	YBR272C	Proteasome-interacting protein involved in the assembly of the base subcomplex of the 19S proteasomal regulatory particle (RP); involved in DNA mismatch repair during slow growth; weak similarity to Msh1p; related to human 19S subunit S5b	1.395	918	No
MRC1	YCL061C	S-phase checkpoint protein required for DNA replication; interacts with and stabilizes Pol2p at stalled replication forks during stress, where it forms a pausing complex with Tof1p and is phosphorylated by Mec1p; protects uncapped telomeres	1.395	919	No
CBP2	YHL038C	Mitochondrial protein required for splicing of the group I intron aI5 of the COB pre-mRNA, binds to the RNA to promote splicing; also involved in but not essential for splicing of the COB bI2 intron and the intron in the 21S rRNA gene	1.39474	920	Yes
YPT11	YNL304W	Rab-type small GTPase that interacts with the C-terminal tail domain of Myo2p; mediates distribution of mitochondria and endoplasmic reticuli to daughter cells	1.39467	921	No
RBG2	YGR173W	Protein with similarity to mammalian developmentally regulated GTP-binding protein	1.39467	922	No
NHP6B	YBR089C-A	High-mobility group non-histone chromatin protein, functionally redundant with Nhp6Ap; homologous to mammalian high mobility group proteins 1 and 2; acts to recruit transcription factor Rcs1p to certain promoters	1.39333	923	No
EEB1	YPL095C	Acyl-coenzymeA:ethanol O-acyltransferase responsible for the major part of medium-chain fatty acid ethyl ester biosynthesis during fermentation; possesses short-chain esterase activity; may be involved in lipid metabolism and detoxification	1.393	924	No
MIR1	YJR077C	Mitochondrial phosphate carrier, imports inorganic phosphate into mitochondria; functionally redundant with Pic2p but more abundant than Pic2p under normal conditions; phosphorylated	1.39267	925	No
TAF3	YPL011C	TFIID subunit (47 kDa), involved in promoter binding and RNA polymerase II transcription initiation	1.39233	926	No
ACP1	YKL192C	Mitochondrial matrix acyl carrier protein, involved in biosynthesis of octanoate, which is a precursor to lipoic acid; activated by phosphopantetheinylation catalyzed by Ppt2p	1.39233	927	No
MAK32	YCR019W	Protein necessary for structural stability of L-A double-stranded RNA-containing particles	1.39189	928	Yes
YHL045W	YHL045W	Putative protein of unknown function; not an essential gene	1.39067	929	No
TPO5	YKL174C	Protein involved in excretion of putrescine and spermidine; putative polyamine transporter in the Golgi or post-Golgi vesicles	1.39033	930	No
CDC8	YJR057W	Thymidylate and uridylate kinase, functions in de novo biosynthesis of pyrimidine deoxyribonucleotides; converts dTMP to dTDP and dUMP to dUTP; essential for mitotic and meiotic DNA replication; homologous to S. pombe Tmp1p	1.39033	931	No
PRP38	YGR075C	Unique component of the U4/U6.U5 tri-snRNP particle, required for conformational changes which result in the catalytic activation of the spliceosome; dispensible for spliceosome assembly	1.389	932	Yes
YHB1	YGR234W	Nitric oxide oxidoreductase, flavohemoglobin involved in nitric oxide detoxification; plays a role in the oxidative and nitrosative stress responses	1.389	933	No
SSC1	YJR045C	Hsp70 family ATPase, constituent of the import motor component of the Translocase of the Inner Mitochondrial membrane (TIM23 complex); involved in protein translocation and folding; subunit of SceI endonuclease	1.389	934	No
GIC1	YHR061C	Protein of unknown function involved in initiation of budding and cellular polarization, interacts with Cdc42p via the Cdc42/Rac-interactive binding (CRIB) domain	1.38833	935	No
OCA1	YNL099C	Putative protein tyrosine phosphatase, required for cell cycle arrest in response to oxidative damage of DNA	1.38767	936	No
XPT1	YJR133W	Xanthine-guanine phosphoribosyl transferase, required for xanthine utilization and for optimal utilization of guanine	1.38767	937	No
CAM1	YPL048W	Nuclear protein required for transcription of MXR1; binds the MXR1 promoter in the presence of other nuclear factors; binds calcium and phospholipids; has similarity to translational cofactor EF-1 gamma	1.38767	938	No
CSH1	YBR161W	Probable catalytic subunit of a mannosylinositol phosphorylceramide (MIPC) synthase, forms a complex with probable regulatory subunit Csg2p; function in sphingolipid biosynthesis is overlapping with that of Sur1p	1.387	939	No
ALP1	YNL270C	Arginine transporter; expression is normally very low and it is unclear what conditions would induce significant expression	1.387	940	No
AAT2	YLR027C	Cytosolic aspartate aminotransferase, involved in nitrogen metabolism; localizes to peroxisomes in oleate-grown cells	1.387	941	No
PHO2	YDL106C	Homeobox transcription factor; regulatory targets include genes involved in phosphate metabolism; binds cooperatively with Pho4p to the PHO5 promoter; phosphorylation of Pho2p facilitates interaction with Pho4p	1.38667	942	No
WSC3	YOL105C	Partially redundant sensor-transducer of the stress-activated PKC1-MPK1 signaling pathway involved in maintenance of cell wall integrity; involved in the response to heat shock and other stressors; regulates 1,3-beta-glucan synthesis	1.386	943	No
BET1	YIL004C	Type II membrane protein required for vesicular transport between the endoplasmic reticulum and Golgi complex; v-SNARE with similarity to synaptobrevins	1.38567	944	No
NOG1	YPL093W	Putative GTPase that associates with free 60S ribosomal subunits in the nucleolus and is required for 60S ribosomal subunit biogenesis; constituent of 66S pre-ribosomal particles; member of the ODN family of nucleolar G-proteins	1.3855	945	No
YML133C	YML133C	Putative protein of unknown function with similarity to helicases; the authentic, non-tagged protein is detected in highly purified mitochondria in high-throughput studies; YML133C contains an intron	1.38533	946	Yes
NIP7	YPL211W	Nucleolar protein required for 60S ribosome subunit biogenesis, constituent of 66S pre-ribosomal particles; physically interacts with Nop8p and the exosome subunit Rrp43p	1.385	947	Yes
TFP3	YPL234C	Vacuolar ATPase V0 domain subunit c', involved in proton transport activity; hydrophobic integral membrane protein (proteolipid) containing four transmembrane segments; N and C termini are in the vacuolar lumen	1.38467	948	No
YIL091C	YIL091C	Nucleolar protein of unknown function; proposed to function as an RNA helicase based on structure prediction and remote homology searches; essential for viability	1.384	949	No
YLL056C	YLL056C	Putative protein of unknown function, transcription is activated by paralogous transcription factors Yrm1p and Yrr1p and genes involved in pleiotropic drug resistance (PDR); expression is induced in cells treated with the mycotoxin patulin	1.38333	950	No
DOT5	YIL010W	Nuclear thiol peroxidase which functions as an alkyl-hydroperoxide reductase during post-diauxic growth	1.383	951	No
YPR076W	YPR076W	Dubious open reading frame unlikely to encode a functional protein, based on available experimental and comparative sequence data	1.383	952	No
ANB1	YJR047C	Translation elongation factor eIF-5A, previously thought to function in translation initiation; similar to and functionally redundant with Hyp2p; undergoes an essential hypusination modification; expressed under anaerobic conditions	1.383	953	No
FYV7	YLR068W	Essential protein required for maturation of 18S rRNA; required for survival upon exposure to K1 killer toxin	1.38267	954	Yes
ROG1	YGL144C	Protein with putative serine active lipase domain	1.382	955	No
TIM8	YJR135W-A	Mitochondrial intermembrane space protein mediating import and insertion of polytopic inner membrane proteins; homolog of human DDP1 (deafness dystonia peptide 1) which is mutated in the X-linked Mohr-Tranebjaerg syndrome	1.38167	956	No
YJL027C	YJL027C	Putative protein of unknown function	1.38167	957	No
COG5	YNL051W	Component of the conserved oligomeric Golgi complex (Cog1p through Cog8p), a cytosolic tethering complex that functions in protein trafficking to mediate fusion of transport vesicles to Golgi compartments	1.38167	958	No
RPF1	YHR088W	Nucleolar protein involved in the assembly and export of the large ribosomal subunit; constituent of 66S pre-ribosomal particles; contains a sigma(70)-like motif, which is thought to bind RNA	1.38158	959	Yes
YOR331C	YOR331C	Dubious open reading frame unlikely to encode a protein, based on available experimental and comparative sequence data; open reading frame overlaps the verified gene VMA4/YOR332W	1.38033	960	No
PKR1	YMR123W	V-ATPase assembly factor, functions with other V-ATPase assembly factors in the ER to efficiently assemble the V-ATPase membrane sector (V0)	1.379	961	No
ANS1	YHR126C	Putative protein of unknown function; transcription dependent upon Azf1p	1.37833	962	No
YKR041W	YKR041W	Putative protein of unknown function; green fluorescent protein (GFP)-fusion protein localizes to the cytoplasm and nucleus	1.378	963	No
YGR021W	YGR021W	Putative protein of unknown function; the authentic, non-tagged protein is detected in highly purified mitochondria in high-throughput studies	1.37767	964	No
RBD2	YPL246C	Possible rhomboid protease, has similarity to eukaryotic rhomboid proteases including Pcp1p	1.37767	965	No
DFG10	YIL049W	Protein of unknown function, involved in filamentous growth	1.37733	966	No
RPC11	YDR045C	RNA polymerase III subunit C11; mediates pol III RNA cleavage activity and is important for termination of transcription; homologous to TFIIS	1.377	967	No
ATP14	YLR295C	Subunit h of the F0 sector of mitochondrial F1F0 ATP synthase, which is a large, evolutionarily conserved enzyme complex required for ATP synthesis	1.377	968	No
YJR020W	YJR020W	Dubious open reading frame unlikely to encode a functional protein, based on available experimental and comparative sequence data	1.377	969	No
RCK2	YLR248W	Protein kinase involved in the response to oxidative and osmotic stress; identified as suppressor of S. pombe cell cycle checkpoint mutations	1.376	970	No
VRG4	YGL225W	Golgi GDP-mannose transporter; regulates Golgi function and glycosylation in Golgi	1.376	971	No
EST3	YIL009C-A	Component of the telomerase holoenzyme, involved in telomere replication	1.37567	972	Yes
GLO3	YER122C	ADP-ribosylation factor GTPase activating protein (ARF GAP), involved in ER-Golgi transport; shares functional similarity with Gcs1p	1.375	973	No
STB3	YDR169C	Ribosomal RNA processing element (RRPE)-binding protein involved in the induction of non-ribosomal protein growth genes by glucose; binds Sin3p in a two-hybrid assay	1.375	974	No
YGR038C-B	YGR038C-B	Retrotransposon TYA Gag and TYB Pol genes; transcribed/translated as one unit; polyprotein is processed to make a nucleocapsid-like protein (Gag), reverse transcriptase (RT), protease (PR), and integrase (IN); similar to retroviral genes	1.375	975	No
TOM71	YHR117W	Mitochondrial outer membrane protein with similarity to Tom70p; probable minor component of the TOM (translocase of outer membrane) complex responsible for recognition and import of mitochondrially directed proteins	1.37433	976	No
RUD3	YOR216C	Golgi matrix protein involved in the structural organization of the cis-Golgi; interacts genetically with COG3 and USO1	1.37433	977	No
YGL041C	YGL041C	Dubious open reading frame unlikely to encode a functional protein, based on available experimental and comparative sequence data	1.374	978	No
AGP2	YBR132C	High affinity polyamine permease, preferentially uses spermidine over putrescine; expression is down-regulated by osmotic stress; plasma membrane carnitine transporter, also functions as a low-affinity amino acid permease	1.37367	979	No
CUP5	YEL027W	Proteolipid subunit of the vacuolar H(+)-ATPase V0 sector (subunit c; dicyclohexylcarbodiimide binding subunit); required for vacuolar acidification and important for copper and iron metal ion homeostasis	1.373	980	No
AIM27	YKL207W	Member of a transmembrane complex required for efficient folding of proteins in the ER; required for respiratory growth; null mutant displays induction of the unfolded protein response	1.37267	981	No
YJL147C	YJL147C	Mitochondrial protein of unknown function; homozygous diploid deletion strain has a sporulation defect characterized by elevated dityrosine in the soluble fraction; expression induced by calcium shortage; YJL147W is a non-essential gene	1.37233	982	No
STI1	YOR027W	Hsp90 cochaperone, interacts with the Ssa group of the cytosolic Hsp70 chaperones; activates the ATPase activity of Ssa1p; homolog of mammalian Hop protein	1.372	983	No
LEO1	YOR123C	Component of the Paf1 complex, which associates with RNA polymerase II and is involved in histone methylation; plays a role in regulating Ty1 transposition	1.37167	984	No
HIS5	YIL116W	Histidinol-phosphate aminotransferase, catalyzes the seventh step in histidine biosynthesis; responsive to general control of amino acid biosynthesis; mutations cause histidine auxotrophy and sensitivity to Cu, Co, and Ni salts	1.37133	985	No
YIL057C	YIL057C	Putative protein of unknown function; expression induced under carbon limitation and repressed under high glucose	1.37133	986	No
FOL3	YMR113W	Dihydrofolate synthetase, involved in folic acid biosynthesis; catalyzes the conversion of dihydropteroate to dihydrofolate in folate coenzyme biosynthesis	1.37067	987	No
YCR076C	YCR076C	Putative protein of unknown function; YCR076C is not an essential gene	1.37033	988	No
CTI6	YPL181W	Protein that relieves transcriptional repression by binding to the Cyc8p-Tup1p corepressor and recruiting the SAGA complex to the repressed promoter; contains a PHD finger domain	1.37033	989	No
TSR2	YLR435W	Protein with a potential role in pre-rRNA processing	1.36967	990	No
PCL2	YDL127W	Cyclin, interacts with cyclin-dependent kinase Pho85p; member of the Pcl1,2-like subfamily, involved in the regulation of polarized growth and morphogenesis and progression through the cell cycle; localizes to sites of polarized cell growth	1.36933	991	No
YGR137W	YGR137W	Dubious open reading frame unlikely to encode a functional protein, based on available experimental and comparative sequence data	1.36933	992	No
CBT1	YKL208W	Protein involved in 5' end processing of mitochondrial COB, 15S_rRNA, and RPM1 transcripts; may also have a role in 3' end processing of the COB pre-mRNA; displays genetic interaction with cell cycle-regulated kinase Dbf2p	1.36833	993	Yes
ZEO1	YOL109W	Peripheral membrane protein of the plasma membrane that interacts with Mid2p; regulates the cell integrity pathway mediated by Pkc1p and Slt2p; the authentic protein is detected in a phosphorylated state in highly purified mitochondria	1.36833	994	No
YDR170W-A	YDR170W-A	Retrotransposon TYA Gag gene; Gag is a nucleocapsid protein that is the structural constituent of virus-like particles (VLPs); similar to retroviral Gag; YDR170W-A is part of a mutant retrotransposon	1.36767	995	Yes
YPT10	YBR264C	GTP binding protein that contains the PEST signal sequence specific for proteolytic enzymes; may be involved in vesicular transport; overexpression leads to accumulation of Golgi-like cisternae with budding vesicles	1.36767	996	No
PRI1	YIR008C	Subunit of DNA primase, which is required for DNA synthesis and double-strand break repair	1.36733	997	No
IZH4	YOL101C	Membrane protein involved in zinc ion homeostasis, member of the four-protein IZH family, expression induced by fatty acids and altered zinc levels; deletion reduces sensitivity to excess zinc; possible role in sterol metabolism	1.36733	998	No
YLR257W	YLR257W	Putative protein of unknown function	1.36667	999	No
ILV6	YCL009C	Regulatory subunit of acetolactate synthase, which catalyzes the first step of branched-chain amino acid biosynthesis; enhances activity of the Ilv2p catalytic subunit, localizes to mitochondria	1.36667	1000	No
NUP53	YMR153W	Subunit of the nuclear pore complex (NPC), interacts with karyopherin Kap121p or with Nup170p via overlapping regions of Nup53p, involved in activation of the spindle checkpoint mediated by the Mad1p-Mad2p complex	1.36633	1001	No
MNP1	YGL068W	Protein associated with the mitochondrial nucleoid; putative mitochondrial ribosomal protein with similarity to E. coli L7/L12 ribosomal protein; required for normal respiratory growth	1.366	1002	No
MRPL13	YKR006C	Mitochondrial ribosomal protein of the large subunit, not essential for mitochondrial translation	1.36585	1003	Yes
SAP1	YER047C	Putative ATPase of the AAA family, interacts with the Sin1p transcriptional repressor in the two-hybrid system	1.36567	1004	No
RRN3	YKL125W	Protein required for transcription of rDNA by RNA polymerase I; transcription factor independent of DNA template; involved in recruitment of RNA polymerase I to rDNA	1.36533	1005	No
CSN12	YJR084W	Subunit of the Cop9 signalosome, which is required for deneddylation, or removal of the ubiquitin-like protein Rub1p from Cdc53p (cullin); involved in mRNA splicing and adaptation to pheromone signaling	1.36533	1006	No
AIM43	YPL099C	Protein of unknown function; the authentic, non-tagged protein is detected in purified mitochondria in high-throughput studies; null mutant displays elevated frequency of mitochondrial genome loss	1.36467	1007	No
DCW1	YKL046C	Putative mannosidase, GPI-anchored membrane protein required for cell wall biosynthesis in bud formation;homologous to Dfg5p	1.36433	1008	No
RPL42B	YHR141C	Protein component of the large (60S) ribosomal subunit, identical to Rpl42Ap and has similarity to rat L44; required for propagation of the killer toxin-encoding M1 double-stranded RNA satellite of the L-A double-stranded RNA virus	1.364	1009	Yes
TEF2	YBR118W	Translational elongation factor EF-1 alpha; also encoded by TEF1; functions in the binding reaction of aminoacyl-tRNA (AA-tRNA) to ribosomes	1.3637	1010	Yes
UBA4	YHR111W	Protein that activates Urm1p before its conjugation to proteins (urmylation); one target is the thioredoxin peroxidase Ahp1p, suggesting a role of urmylation in the oxidative stress response	1.36367	1011	No
ERV46	YAL042W	Protein localized to COPII-coated vesicles, forms a complex with Erv41p; involved in the membrane fusion stage of transport	1.362	1012	No
MRPL23	YOR150W	Mitochondrial ribosomal protein of the large subunit	1.36111	1013	Yes
RPP0	YLR340W	Conserved ribosomal protein P0 similar to rat P0, human P0, and E. coli L10e; shown to be phosphorylated on serine 302	1.361	1014	Yes
YCL075W	YCL075W	Pseudogene: encodes fragment of Ty Pol protein	1.361	1015	Yes
YPR091C	YPR091C	Putative protein of unknown function; may interact with ribosomes, based on co-purification experiments; green fluorescent protein (GFP)-fusion protein localizes to the endoplasmic reticulum; YPR091C is not an essential gene	1.361	1016	No
PGK1	YCR012W	3-phosphoglycerate kinase, catalyzes transfer of high-energy phosphoryl groups from the acyl phosphate of 1,3-bisphosphoglycerate to ADP to produce ATP; key enzyme in glycolysis and gluconeogenesis	1.361	1017	No
AUR1	YKL004W	Phosphatidylinositol:ceramide phosphoinositol transferase (IPC synthase), required for sphingolipid synthesis; can mutate to confer aureobasidin A resistance	1.361	1018	No
YJR142W	YJR142W	Putative protein of unknown function; GST fusion protein is a Dbf2-Mob1 phosphoylation target in a proteome chip analysis; synthetic lethal with PH085 deletion; plays a role in restricting Ty1 transposition	1.361	1019	No
ATG21	YPL100W	Phosphoinositide binding protein required for vesicle formation in the cytoplasm-to-vacuole targeting (Cvt) pathway; binds both phosphatidylinositol (3,5)-bisphosphate and phosphatidylinositol 3-phosphate; WD-40 repeat protein	1.361	1020	No
YSC83	YHR017W	Non-essential mitochondrial protein of unknown function; mRNA induced during meiosis, peaking between mid to late prophase of meiosis I; similar to S. douglasii YSD83	1.361	1021	No
NUP60	YAR002W	Subunit of the nuclear pore complex (NPC), functions to anchor Nup2p to the NPC in a process controlled by the nucleoplasmic concentration of Gsp1p-GTP; potential Cdc28p substrate; involved in telomere maintenance	1.361	1022	No
DUT1	YBR252W	dUTPase, catalyzes hydrolysis of dUTP to dUMP and PPi, thereby preventing incorporation of uracil into DNA during replication; critical for the maintenance of genetic stability	1.36067	1023	No
AVT1	YJR001W	Vacuolar transporter, imports large neutral amino acids into the vacuole; member of a family of seven S. cerevisiae genes (AVT1-7) related to vesicular GABA-glycine transporters	1.36033	1024	No
APP1	YNL094W	Protein of unknown function, interacts with Rvs161p and Rvs167p; computational analysis of protein-protein interactions in large-scale studies suggests a possible role in actin filament organization	1.36033	1025	No
RPS20	YHL015W	Protein component of the small (40S) ribosomal subunit; overproduction suppresses mutations affecting RNA polymerase III-dependent transcription; has similarity to E. coli S10 and rat S20 ribosomal proteins	1.35989	1026	Yes
MND1	YGL183C	Protein required for recombination and meiotic nuclear division; forms a complex with Hop2p, which is involved in chromosome pairing and repair of meiotic double-strand breaks	1.358	1027	No
PRE9	YGR135W	Alpha 3 subunit of the 20S proteasome, the only nonessential 20S subunit; may be replaced by the alpha 4 subunit (Pre6p) under stress conditions to create a more active proteasomal isoform	1.35767	1028	No
ZRT1	YGL255W	High-affinity zinc transporter of the plasma membrane, responsible for the majority of zinc uptake; transcription is induced under low-zinc conditions by the Zap1p transcription factor	1.35767	1029	No
RFA1	YAR007C	Subunit of heterotrimeric Replication Protein A (RPA), which is a highly conserved single-stranded DNA binding protein involved in DNA replication, repair, and recombination	1.35733	1030	No
CHS7	YHR142W	Protein of unknown function, involved in chitin biosynthesis by regulating Chs3p export from the ER	1.357	1031	No
YMR210W	YMR210W	Putative acyltransferase with similarity to Eeb1p and Eht1p, has a minor role in medium-chain fatty acid ethyl ester biosynthesis; may be involved in lipid metabolism and detoxification	1.35667	1032	No
RPL1A	YPL220W	N-terminally acetylated protein component of the large (60S) ribosomal subunit, nearly identical to Rpl1Bp and has similarity to E. coli L1 and rat L10a ribosomal proteins; rpl1a rpl1b double null mutation is lethal	1.35623	1033	Yes
VPS29	YHR012W	Endosomal protein that is a subunit of the membrane-associated retromer complex essential for endosome-to-Golgi retrograde transport; forms a subcomplex with Vps35p and Vps26p that selects cargo proteins for endosome-to-Golgi retrieval	1.356	1034	No
YKL136W	YKL136W	Dubious open reading frame unlikely to encode a protein, based on available experimental and comparative sequence data; partially overlaps the verified ORF APL2/YKL135C	1.356	1035	No
TGL1	YKL140W	Steryl ester hydrolase, one of three gene products (Yeh1p, Yeh2p, Tgl1p) responsible for steryl ester hydrolase activity and involved in sterol homeostasis; localized to lipid particle membranes	1.356	1036	No
ZRT3	YKL175W	Vacuolar membrane zinc transporter, transports zinc from storage in the vacuole to the cytoplasm when needed; transcription is induced under conditions of zinc deficiency	1.35567	1037	No
TAH18	YPR048W	Protein of unknown function that plays a pro-death role in response to oxidative stress; highly conserved across species and similar to human protein NDOR1; allele is synthetically lethal with the pol3-13 allele of DNA polymerase delta	1.35567	1038	No
NMD2	YHR077C	Protein involved in the nonsense-mediated mRNA decay (NMD) pathway; interacts with Nam7p and Upf3p; involved in telomere maintenance	1.35526	1039	Yes
LSM4	YER112W	Lsm (Like Sm) protein; part of heteroheptameric complexes (Lsm2p-7p and either Lsm1p or 8p): cytoplasmic Lsm1p complex involved in mRNA decay; nuclear Lsm8p complex part of U6 snRNP and possibly involved in processing tRNA, snoRNA, and rRNA	1.35526	1040	Yes
YFR020W	YFR020W	Dubious open reading frame unlikely to encode a functional protein, based on available experimental and comparative sequence data	1.355	1041	No
IES4	YOR189W	Component of the INO80 chromatiin remodeling complex and target of the Mec1p/Tel1p DNA damage signaling pathway; proposed to link chromatin remodeling to replication checkpoint responses	1.355	1042	No
MET17	YLR303W	Methionine and cysteine synthase (O-acetyl homoserine-O-acetyl serine sulfhydrylase), required for sulfur amino acid synthesis	1.35467	1043	No
GCR2	YNL199C	Transcriptional activator of genes involved in glycolysis; interacts and functions with the DNA-binding protein Gcr1p	1.35467	1044	No
SNL1	YIL016W	Protein of unknown function proposed to be involved in nuclear pore complex biogenesis and maintenance as well as protein folding; has similarity to the mammalian BAG-1 protein	1.35433	1045	No
SWH1	YAR042W	Protein similar to mammalian oxysterol-binding protein; contains ankyrin repeats; localizes to the Golgi and the nucleus-vacuole junction	1.35433	1046	No
HXT9	YJL219W	Putative hexose transporter that is nearly identical to Hxt11p, has similarity to major facilitator superfamily (MFS) transporters, expression of HXT9 is regulated by transcription factors Pdr1p and Pdr3p	1.354	1047	No
TTI2	YJR136C	Putative protein of unknown function; subunit of the ASTRA complex which is part of the chromatin remodeling machinery; similar to S. pombe Tti2p; may interact with Rsm23p; GFP-fusion protein localizes to the cytoplasm	1.354	1048	No
ERG13	YML126C	3-hydroxy-3-methylglutaryl-CoA (HMG-CoA) synthase, catalyzes the formation of HMG-CoA from acetyl-CoA and acetoacetyl-CoA; involved in the second step in mevalonate biosynthesis	1.354	1049	No
YJL213W	YJL213W	Protein of unknown function that may interact with ribosomes; periodically expressed during the yeast metabolic cycle; phosphorylated in vitro by the mitotic exit network (MEN) kinase complex, Dbf2p/Mob1p	1.35367	1050	No
VHS2	YIL135C	Cytoplasmic protein of unknown function; identified as a high-copy suppressor of the synthetic lethality of a sis2 sit4 double mutant, suggesting a role in G1/S phase progression; similar to Mlf3p	1.35367	1051	No
PTA1	YAL043C-A	Subunit of holo-CPF, a multiprotein complex and functional homolog of mammalian CPSF, required for the cleavage and polyadenylation of mRNA and snoRNA 3' ends; involved in pre-tRNA processing; binds to the phosphorylated CTD of RNAPII	1.353	1052	Yes
SLS1	YLR139C	Mitochondrial membrane protein that coordinates expression of mitochondrially-encoded genes; may facilitate delivery of mRNA to membrane-bound translation machinery	1.353	1053	No
YMR178W	YMR178W	Putative protein of unknown function; green fluorescent protein (GFP)-fusion protein localizes to both the cytoplasm and nucleus and is induced in response to the DNA-damaging agent MMS; YMR178W is not an essential gene	1.353	1054	No
UBP7	YIL156W	Ubiquitin-specific protease that cleaves ubiquitin-protein fusions	1.35267	1055	Yes
ALA1	YOR335C	Cytoplasmic and mitochondrial alanyl-tRNA synthetase, required for protein synthesis; point mutation (cdc64-1 allele) causes cell cycle arrest at G1; lethality of null mutation is functionally complemented by human homolog	1.352	1056	No
FPR3	YML074C	Nucleolar peptidyl-prolyl cis-trans isomerase (PPIase); FK506 binding protein; phosphorylated by casein kinase II (Cka1p-Cka2p-Ckb1p-Ckb2p) and dephosphorylated by Ptp1p	1.3515	1057	No
RIB4	YOL143C	Lumazine synthase (6,7-dimethyl-8-ribityllumazine synthase, also known as DMRL synthase); catalyzes synthesis of immediate precursor to riboflavin	1.35133	1058	No
ATG23	YLR431C	Peripheral membrane protein required for the cytoplasm-to-vacuole targeting (Cvt) pathway and efficient macroautophagy; cycles between the phagophore assembly site (PAS) and non-PAS locations; forms a complex with Atg9p and Atg27p	1.35133	1059	No
NDD1	YOR372C	Transcriptional activator essential for nuclear division; localized to the nucleus; essential component of the mechanism that activates the expression of a set of late-S-phase-specific genes	1.351	1060	No
PRM3	YPL192C	Pheromone-regulated protein required for nuclear envelope fusion during karyogamy; localizes to the outer face of the nuclear membrane; interacts with Kar5p at the spindle pole body	1.35067	1061	No
YGL188C	YGL188C	Dubious open reading frame unlikely to encode a functional protein, based on available experimental and comparative sequence data	1.35033	1062	No
MPD2	YOL088C	Member of the protein disulfide isomerase (PDI) family, exhibits chaperone activity; overexpression suppresses the lethality of a pdi1 deletion but does not complement all Pdi1p functions; undergoes oxidation by Ero1p	1.35033	1063	No
YMR010W	YMR010W	Putative protein of unknown function; green fluorescent protein (GFP)-fusion protein localizes to the cytoplasm; YMR010W is not an essential gene; YMR010W mRNA is transcribed with ADI1	1.35033	1064	No
HIF1	YLL022C	Non-essential component of the HAT-B histone acetyltransferase complex (Hat1p-Hat2p-Hif1p), localized to the nucleus; has a role in telomeric silencing	1.35033	1065	No
MMF1	YIL051C	Mitochondrial protein involved in maintenance of the mitochondrial genome	1.35	1066	No
YOR060C	YOR060C	Protein of unknown function required for cell viability; deletion mutant harbors aberrant mitochondria	1.35	1067	No
MSS51	YLR203C	Nuclear encoded protein required for translation of COX1 mRNA; binds to Cox1 protein	1.34933	1068	No
SAC1	YKL212W	Phosphatidylinositol phosphate (PtdInsP) phosphatase involved in hydrolysis of PtdIns[4]P; transmembrane protein localizes to ER and Golgi; involved in protein trafficking and processing, secretion, and cell wall maintenance	1.34867	1069	No
YAP6	YDR259C	Putative basic leucine zipper (bZIP) transcription factor; overexpression increases sodium and lithium tolerance; computational analysis suggests a role in regulation of expression of genes involved in carbohydrate metabolism	1.3485	1070	No
SKG6	YHR149C	Integral membrane protein that localizes primarily to growing sites such as the bud tip or the cell periphery; potential Cdc28p substrate; Skg6p interacts with Zds1p and Zds2p	1.34833	1071	No
URM1	YIL008W	Ubiquitin-like protein with weak sequence similarity to ubiquitin; depends on the E1-like activating enzyme Uba4p; molecular function of the Urm1p pathway is unknown, but it is required for normal growth, particularly at high temperature	1.34833	1072	No
TRP3	YKL211C	Bifunctional enzyme exhibiting both indole-3-glycerol-phosphate synthase and anthranilate synthase activities, forms multifunctional hetero-oligomeric anthranilate synthase:indole-3-glycerol phosphate synthase enzyme complex with Trp2p	1.34767	1073	No
DMA1	YHR115C	Protein involved in ubiquitin ligation; plays a role in regulating spindle position and orientation; functionally redundant with Dma2p; orthologous to human RNF8 protein, also has sequence similarity to human Chfr.	1.34733	1074	No
GPA1	YHR005C	GTP-binding alpha subunit of the heterotrimeric G protein that couples to pheromone receptors; negatively regulates the mating pathway by sequestering G(beta)gamma and by triggering an adaptive response; activates Vps34p at the endosome	1.347	1075	No
YLR279W	YLR279W	Dubious open reading frame unlikely to encode a functional protein, based on available experimental and comparative sequence data	1.347	1076	No
YJR037W	YJR037W	Dubious open reading frame unlikely to encode a protein, based on available experimental and comparative sequence data; partially overlaps verified gene HUL4/YJR036C; deletion mutant has decreased spore survival in Drosophila feces	1.347	1077	No
YJL028W	YJL028W	Protein of unknown function; may interact with ribosomes, based on co-purification experiments	1.347	1078	No
MED6	YHR058C	Subunit of the RNA polymerase II mediator complex; associates with core polymerase subunits to form the RNA polymerase II holoenzyme; essential for transcriptional regulation	1.34667	1079	No
NMD3	YHR170W	Protein involved in nuclear export of the large ribosomal subunit; acts as a Crm1p-dependent adapter protein for export of nascent ribosomal subunits through the nuclear pore complex	1.34615	1080	Yes
DBP9	YLR276C	ATP-dependent RNA helicase of the DEAD-box family involved in biogenesis of the 60S ribosomal subunit	1.346	1081	Yes
YHR138C	YHR138C	Putative protein of unknown function; has similarity to Pbi2p; double null mutant lacking Pbi2p and Yhr138p exhibits highly fragmented vacuoles	1.34533	1082	No
VPS55	YJR044C	Late endosomal protein involved in late endosome to vacuole trafficking; functional homolog of human obesity receptor gene-related protein (OB-RGRP)	1.345	1083	No
TPT1	YOL102C	tRNA 2'-phosphotransferase, catalyzes the final step in yeast tRNA splicing: the transfer of the 2'-PO(4) from the splice junction to NAD(+) to form ADP-ribose 1''-2''cyclic phosphate and nicotinamide	1.345	1084	Yes
YHR217C	YHR217C	Dubious open reading frame unlikely to encode a protein, based on available experimental and comparative sequence data; located in the telomeric region TEL08R.	1.345	1085	No
DDR48	YMR173W	DNA damage-responsive protein, expression is increased in response to heat-shock stress or treatments that produce DNA lesions; contains multiple repeats of the amino acid sequence NNNDSYGS	1.345	1086	No
GPG1	YGL121C	Proposed gamma subunit of the heterotrimeric G protein that interacts with the receptor Gpr1p; involved in regulation of pseudohyphal growth; requires Gpb1p or Gpb2p to interact with Gpa2p; overproduction causes prion curing	1.34367	1087	No
PUP2	YGR253C	Alpha 5 subunit of the 20S proteasome involved in ubiquitin-dependent catabolism; human homolog is subunit zeta	1.34367	1088	No
YOR111W	YOR111W	Putative protein of unknown function	1.343	1089	No
EMP24	YGL200C	Integral membrane component of endoplasmic reticulum-derived COPII-coated vesicles, which function in ER to Golgi transport	1.343	1090	No
COQ4	YDR204W	Protein with a role in ubiquinone (Coenzyme Q) biosynthesis, possibly functioning in stabilization of Coq7p; located on the matrix face of the mitochondrial inner membrane; component of a mitochondrial ubiquinone-synthesizing complex	1.34267	1091	No
RPL6A	YML073C	N-terminally acetylated protein component of the large (60S) ribosomal subunit, has similarity to Rpl6Bp and to rat L6 ribosomal protein; binds to 5.8S rRNA	1.342	1092	Yes
SIP18	YMR175W	Phospholipid-binding protein; expression is induced by osmotic stress	1.341	1093	No
TDH3	YGR192C	Glyceraldehyde-3-phosphate dehydrogenase, isozyme 3, involved in glycolysis and gluconeogenesis; tetramer that catalyzes the reaction of glyceraldehyde-3-phosphate to 1,3 bis-phosphoglycerate; detected in the cytoplasm and cell-wall	1.34067	1094	No
PHO4	YFR034C	Basic helix-loop-helix (bHLH) transcription factor of the myc-family; binds cooperatively with Pho2p to the PHO5 promoter; function is regulated by phosphorylation at multiple sites and by phosphate availability	1.34033	1095	No
YUH1	YJR099W	Ubiquitin C-terminal hydrolase that cleaves ubiquitin-protein fusions to generate monomeric ubiquitin; hydrolyzes the peptide bond at the C-terminus of ubiquitin; also the major processing enzyme for the ubiquitin-like protein Rub1p	1.34033	1096	No
MNR2	YKL064W	Putative magnesium transporter; has similarity to Alr1p and Alr2p, which mediate influx of Mg2+ and other divalent cations	1.33933	1097	No
SMD2	YLR275W	Core Sm protein Sm D2; part of heteroheptameric complex (with Smb1p, Smd1p, Smd3p, Sme1p, Smx3p, and Smx2p) that is part of the spliceosomal U1, U2, U4, and U5 snRNPs; homolog of human Sm D2	1.33929	1098	Yes
TPS1	YBR126C	Synthase subunit of trehalose-6-phosphate synthase/phosphatase complex, which synthesizes the storage carbohydrate trehalose; also found in a monomeric form; expression is induced by the stress response and repressed by the Ras-cAMP pathway	1.339	1099	No
NPT1	YOR209C	Nicotinate phosphoribosyltransferase, acts in the salvage pathway of NAD+ biosynthesis; required for silencing at rDNA and telomeres and has a role in silencing at mating-type loci; localized to the nucleus	1.33833	1100	No
DBR1	YKL149C	RNA lariat debranching enzyme, involved in intron turnover; required for efficient Ty1 transposition	1.3381	1101	Yes
MIP6	YHR015W	Putative RNA-binding protein, interacts with Mex67p, which is a component of the nuclear pore involved in nuclear mRNA export	1.33738	1102	Yes
RHR2	YIL053W	Constitutively expressed isoform of DL-glycerol-3-phosphatase; involved in glycerol biosynthesis, induced in response to both anaerobic and, along with the Hor2p/Gpp2p isoform, osmotic stress	1.33733	1103	No
YCL074W	YCL074W	Pseudogene: encodes fragment of Ty Pol protein	1.337	1104	Yes
AIM5	YBR262C	Protein of unknown function; the authentic, non-tagged protein is detected in purified mitochondria in high-throughput studies; null mutant displays elevated frequency of mitochondrial genome loss	1.33533	1105	No
YHR127W	YHR127W	Protein of unknown function; localizes to the nucleus; required for asymmetric localization of Kar9p during mitosis	1.33533	1106	No
GEP4	YHR100C	Protein of unknown function required for respiratory growth; detected in highly purified mitochondria in high-throughput studies; null mutation confers sensitivity to tunicamycin and DTT and decreased levels of phosphatidylethanol	1.335	1107	No
KEG1	YFR042W	Integral membrane protein of the ER; physically interacts with Kre6p; has a role in the synthesis of beta-1,6-glucan in the cell wall; required for cell viability	1.335	1108	No
ARD1	YHR013C	Subunit of N-terminal acetyltransferase NatA (Nat1p, Ard1p, Nat5p); acetylates many proteins and thus affects telomeric silencing, cell cycle, heat-shock resistance, mating, and sporulation; human Ard1p levels are elevated in cancer cells	1.33467	1109	No
RPN2	YIL075C	Subunit of the 26S proteasome, substrate of the N-acetyltransferase Nat1p	1.33433	1110	No
ILV3	YJR016C	Dihydroxyacid dehydratase, catalyzes third step in the common pathway leading to biosynthesis of branched-chain amino acids	1.33333	1111	No
VPS65	YLR322W	Dubious open reading frame, unlikely to encode a protein; not conserved in closely related Saccharomyces species; 75% of ORF overlaps the verified gene SFH1; deletion causes a vacuolar protein sorting defect and blocks anaerobic growth	1.33333	1112	No
YBR235W	YBR235W	Putative ion transporter, similar to mammalian electroneutral Na(+)-(K+)-C1- cotransporter family; YBR235W is not an essential gene	1.333	1113	No
SHE1	YBL031W	Mitotic spindle protein that interacts with components of the Dam1 (DASH) complex, its effector Sli15p, and microtubule-associated protein Bim1p; also localizes to nuclear microtubules and to the bud neck in a ring-shaped structure	1.33267	1114	No
AYR1	YIL124W	NADPH-dependent 1-acyl dihydroxyacetone phosphate reductase found in lipid particles, ER, and mitochondrial outer membrane; involved in phosphatidic acid biosynthesis; required for spore germination; capable of metabolizing steroid hormones	1.33267	1115	No
SMP3	YOR149C	Alpha 1,2-mannosyltransferase involved in glycosyl phosphatidyl inositol (GPI) biosynthesis; required for addition of the fourth, side branching mannose to the GPI core structure	1.33267	1116	No
NAS2	YIL007C	Proteasome-interacting protein involved in the assembly of the base subcomplex of the 19S proteasomal regulatory particle (RP); similar to mammalian proteasomal modulator subunit; non-essential gene; interacts with Rpn4p	1.33267	1117	No
SMY1	YKL079W	Protein that interacts with Myo2p, proposed to be involved in exocytosis; N-terminal domain is related to the motor domain of kinesins	1.33067	1118	No
RAX1	YOR301W	Protein involved in bud site selection during bipolar budding; localization requires Rax2p; has similarity to members of the insulin-related peptide superfamily	1.33067	1119	No
YME1	YPR024W	Catalytic subunit of the mitochondrial inner membrane i-AAA protease complex, which is responsible for degradation of unfolded or misfolded mitochondrial gene products; mutation causes an elevated rate of mitochondrial turnover	1.33033	1120	No
APE2	YKL157W	Aminopeptidase yscII; may have a role in obtaining leucine from dipeptide substrates; sequence coordinates have changed since RT-PCR analysis showed that the adjacent ORF YKL158W comprises the 5' exon of APE2/YKL157W	1.33033	1121	No
COX6	YHR051W	Subunit VI of cytochrome c oxidase, which is the terminal member of the mitochondrial inner membrane electron transport chain; expression is regulated by oxygen levels	1.33033	1122	No
WSS1	YHR134W	Sumoylated protein of unknown function, identified based on genetic interactions with SMT3; UV-sensitive mutant phenotype and genetic interactions suggest a role in the DNA damage response, processing stalled or collapsed replication forks	1.33033	1123	No
OCA2	YNL056W	Putative protein with similarity to predicted tyrosine phosphatases Oca1p and Siw14p; green fluorescent protein (GFP)-fusion protein localizes to the cytoplasm; YNL056W is not an essential gene	1.33033	1124	No
PKP2	YGL059W	Mitochondrial protein kinase that negatively regulates activity of the pyruvate dehydrogenase complex by phosphorylating the ser-133 residue of the Pda1p subunit; acts in concert with kinase Pkp1p and phosphatases Ptc5p and Ptc6p	1.32867	1125	No
YNL217W	YNL217W	Hypothetical protein	1.32767	1126	No
YHR125W	YHR125W	Dubious open reading frame unlikely to encode a functional protein, based on available experimental and comparative sequence data	1.32767	1127	No
UBI4	YLL039C	Ubiquitin, becomes conjugated to proteins, marking them for selective degradation via the ubiquitin-26S proteasome system; essential for the cellular stress response; encoded as a polyubiquitin precursor comprised of 5 head-to-tail repeats	1.32767	1128	No
PPX1	YHR201C	Exopolyphosphatase, hydrolyzes inorganic polyphosphate (poly P) into Pi residues; located in the cytosol, plasma membrane, and mitochondrial matrix	1.32767	1129	No
YAL064W	YAL064W	Protein of unknown function; may interact with ribosomes, based on co-purification experiments	1.327	1130	No
ALK2	YBL009W	Protein kinase; accumulation and phosphorylation are periodic during the cell cycle; phosphorylated in response to DNA damage; contains characteristic motifs for degradation via the APC pathway; similar to Alk1p and to mammalian haspins	1.327	1131	No
ELM1	YKL048C	Serine/threonine protein kinase that regulates cellular morphogenesis, septin behavior, and cytokinesis; required for the regulation of other kinases; forms part of the bud neck ring	1.327	1132	No
YDR134C	YDR134C	Hypothetical protein	1.327	1133	No
AHP1	YLR109W	Thiol-specific peroxiredoxin, reduces hydroperoxides to protect against oxidative damage; function in vivo requires covalent conjugation to Urm1p	1.327	1134	No
PMT3	YOR321W	Protein O-mannosyltransferase, transfers mannose residues from dolichyl phosphate-D-mannose to protein serine/threonine residues; acts in a complex with Pmt5p, can instead interact with Pmt1p in some conditions; target for new antifungals	1.32633	1135	No
RTT109	YLL002W	Histone acetyltransferase critical for cell survival in the presence of DNA damage during S phase; acetylates H3-K56 and H3-K9; involved in non-homologous end joining and in regulation of Ty1 transposition; interacts physically with Vps75p	1.32633	1136	No
SEH1	YGL100W	Nuclear pore protein that is part of the evolutionarily conserved Nup84p complex (Nup84p, Nup85p, Nup120p, Nup145p, and Seh1p); homologous to Sec13p	1.326	1137	No
SOM1	YEL059C-A	Subunit of the mitochondrial inner membrane peptidase, which is required for maturation of mitochondrial proteins of the intermembrane space; Som1p facilitates cleavage of a subset of substrates	1.32567	1138	No
MKK2	YPL140C	Mitogen-activated kinase kinase involved in protein kinase C signaling pathway that controls cell integrity; upon activation by Bck1p phosphorylates downstream target, Slt2p; functionally redundant with Mkk1p	1.32567	1139	No
RRN6	YBL014C	Component of the core factor (CF) rDNA transcription factor complex; CF is required for transcription of 35S rRNA genes by RNA polymerase I and is composed of Rrn6p, Rrn7p, and Rrn11p	1.32467	1140	No
YHR140W	YHR140W	Putative integral membrane protein of unknown function	1.32467	1141	No
PXA1	YPL147W	Subunit of a heterodimeric peroxisomal ATP-binding cassette transporter complex (Pxa1p-Pxa2p), required for import of long-chain fatty acids into peroxisomes; similarity to human adrenoleukodystrophy transporter and ALD-related proteins	1.32467	1142	No
COS5	YJR161C	Protein of unknown function, member the DUP380 subfamily of conserved, often subtelomerically-encoded proteins	1.32467	1143	No
MET3	YJR010W	ATP sulfurylase, catalyzes the primary step of intracellular sulfate activation, essential for assimilatory reduction of sulfate to sulfide, involved in methionine metabolism	1.32467	1144	No
QCR8	YJL166W	Subunit 8 of ubiquinol cytochrome-c reductase complex, which is a component of the mitochondrial inner membrane electron transport chain; oriented facing the intermembrane space; expression is regulated by Abf1p and Cpf1p	1.32467	1145	No
DCP1	YOL149W	Subunit of the Dcp1p-Dcp2p decapping enzyme complex, which removes the 5' cap structure from mRNAs prior to their degradation; enhances the activity of catalytic subunit Dcp2p; regulated by DEAD box protein Dhh1p	1.32432	1146	Yes
YLR236C	YLR236C	Dubious open reading frame unlikely to encode a functional protein, based on available experimental and comparative sequence data	1.324	1147	No
RPL40B	YKR094C	Fusion protein, identical to Rpl40Ap, that is cleaved to yield ubiquitin and a ribosomal protein of the large (60S) ribosomal subunit with similarity to rat L40; ubiquitin may facilitate assembly of the ribosomal protein into ribosomes	1.32389	1148	Yes
RER2	YBR002C	Cis-prenyltransferase involved in dolichol synthesis; participates in endoplasmic reticulum (ER) protein sorting	1.32367	1149	No
VMA5	YKL080W	Subunit C of the eight-subunit V1 peripheral membrane domain of vacuolar H+-ATPase (V-ATPase), an electrogenic proton pump found throughout the endomembrane system; required for the V1 domain to assemble onto the vacuolar membrane	1.32367	1150	No
CTF4	YPR135W	Chromatin-associated protein, required for sister chromatid cohesion; interacts with DNA polymerase alpha (Pol1p) and may link DNA synthesis to sister chromatid cohesion	1.32367	1151	No
YJR107W	YJR107W	Putative protein of unknown function; has sequence or structural similarity to lipases	1.323	1152	No
YKL053W	YKL053W	Dubious open reading frame unlikely to encode a protein, based on available experimental and comparative sequence data; partially overlaps verified ORF ASK1	1.32267	1153	No
GRX5	YPL059W	Hydroperoxide and superoxide-radical responsive glutathione-dependent oxidoreductase; mitochondrial matrix protein involved in the synthesis/assembly of iron-sulfur centers; monothiol glutaredoxin subfamily member along with Grx3p and Grx4p	1.32267	1154	No
DSD1	YGL196W	D-serine dehydratase (aka D-serine ammonia-lyase); converts D-serine to pyruvate and ammonia by a reaction dependent on pyridoxal 5'-phosphate and zinc; may play a role in D-serine detoxification; L-serine is not a substrate	1.32233	1155	No
TIF34	YMR146C	eIF3i subunit of the core complex of translation initiation factor 3 (eIF3), which is essential for translation	1.32167	1156	No
ADH6	YMR318C	NADPH-dependent medium chain alcohol dehydrogenase with broad substrate specificity; member of the cinnamyl family of alcohol dehydrogenases; may be involved in fusel alcohol synthesis or in aldehyde tolerance	1.32133	1157	No
FAD1	YDL045C	Flavin adenine dinucleotide (FAD) synthetase, performs the second step in synthesis of FAD from riboflavin	1.321	1158	No
SDL1	YIL167W	Open reading frame, unlikely to produce a functional protein in S288C; in closely related species and other <i>S. cerevisiae</i> strain backgrounds YIL167W and adjacent ORF, YIL168W, constitute a single ORF encoding L-serine dehydratase	1.32067	1159	No
YFL019C	YFL019C	Dubious open reading frame unlikely to encode a protein; YFL019C is not an essential gene	1.32033	1160	No
RPS27A	YKL156W	Protein component of the small (40S) ribosomal subunit; nearly identical to Rps27Bp and has similarity to rat S27 ribosomal protein	1.31935	1161	Yes
HMS1	YOR032C	Basic helix-loop-helix (bHLH) protein with similarity to myc-family transcription factors; overexpression confers hyperfilamentous growth and suppresses the pseudohyphal filamentation defect of a diploid mep1 mep2 homozygous null mutant	1.319	1162	No
AKL1	YBR059C	Ser-Thr protein kinase, member (with Ark1p and Prk1p) of the Ark kinase family; involved in endocytosis and actin cytoskeleton organization	1.318	1163	No
YBR124W	YBR124W	Putative protein of unknown function	1.318	1164	No
PSD2	YGR170W	Phosphatidylserine decarboxylase of the Golgi and vacuolar membranes, converts phosphatidylserine to phosphatidylethanolamine	1.31767	1165	No
THI4	YGR144W	Thiazole synthase, catalyzes formation of a thiazole intermediate during thiamine biosynthesis; required for mitochondrial genome stability in response to DNA damaging agents	1.31767	1166	No
OSH6	YKR003W	Member of an oxysterol-binding protein family with overlapping, redundant functions in sterol metabolism and which collectively perform a function essential for viability; GFP-fusion protein localizes to the cell periphery	1.31767	1167	No
CTK2	YJL006C	Beta subunit of C-terminal domain kinase I (CTDK-I), which phosphorylates both RNA pol II subunit Rpo21p to affect transcription and pre-mRNA 3' end processing, and ribosomal protein Rps2p to increase translational fidelity	1.31733	1168	No
LAP4	YKL103C	Vacuolar aminopeptidase yscI; zinc metalloproteinase that belongs to the peptidase family M18; often used as a marker protein in studies of autophagy and cytosol to vacuole targeting (CVT) pathway	1.31733	1169	No
FIT3	YOR383C	Mannoprotein that is incorporated into the cell wall via a glycosylphosphatidylinositol (GPI) anchor, involved in the retention of siderophore-iron in the cell wall	1.31733	1170	No
TRM13	YOL125W	2'-O-methyltransferase responsible for modification of tRNA at position 4; C-terminal domain has similarity to Rossmann-fold (RFM) superfamily of RNA methyltransferases	1.317	1171	Yes
BUD6	YLR319C	Actin- and formin-interacting protein, involved in actin cable nucleation and polarized cell growth; isolated as bipolar budding mutant; potential Cdc28p substrate	1.31667	1172	No
MAM1	YER106W	Monopolin, kinetochore associated protein involved in chromosome attachment to meiotic spindle	1.31667	1173	No
YLL007C	YLL007C	Putative protein of unknown function; green fluorescent protein (GFP)-fusion protein localizes to the cytoplasm; YLL007C is not an essential gene	1.3165	1174	No
YGR117C	YGR117C	Putative protein of unknown function; green fluorescent protein (GFP)-fusion protein localizes to the cytoplasm	1.31633	1175	No
FZF1	YGL254W	Transcription factor involved in sulfite metabolism, sole identified regulatory target is SSU1, overexpression suppresses sulfite-sensitivity of many unrelated mutants due to hyperactivation of SSU1, contains five zinc fingers	1.31633	1176	No
YIL054W	YIL054W	Dubious open reading frame unlikely to encode a protein, based on available experimental and comparative sequence data	1.31633	1177	No
MRS1	YIR021W	Protein required for the splicing of two mitochondrial group I introns (BI3 in COB and AI5beta in COX1); forms a splicing complex, containing four subunits of Mrs1p and two subunits of the BI3-encoded maturase, that binds to the BI3 RNA	1.316	1178	Yes
LEU5	YHR002W	Mitochondrial carrier protein involved in the accumulation of CoA in the mitochondrial matrix; homolog of human Graves disease protein; does not encode an isozyme of Leu4p, as first hypothesized	1.31333	1179	No
CRG1	YHR209W	Putative S-adenosylmethionine-dependent methyltransferase; mediates cantharidin resistance	1.313	1180	No
YLL037W	YLL037W	Dubious open reading frame unlikely to encode a functional protein; overlaps 3' end of essential PRP19 gene encoding an RNA splicing factor	1.313	1181	No
YJL113W	YJL113W	Retrotransposon TYA Gag and TYB Pol genes; transcribed/translated as one unit; polyprotein is processed to make a nucleocapsid-like protein (Gag), reverse transcriptase (RT), protease (PR), and integrase (IN); similar to retroviral genes	1.313	1182	Yes
IZH3	YLR023C	Membrane protein involved in zinc ion homeostasis, member of the four-protein IZH family, expression induced by zinc deficiency; deletion reduces sensitivity to elevated zinc and shortens lag phase, overexpression reduces Zap1p activity	1.313	1183	No
ENP1	YBR247C	Protein associated with U3 and U14 snoRNAs, required for pre-rRNA processing and 40S ribosomal subunit synthesis; localized in the nucleus and concentrated in the nucleolus	1.3125	1184	Yes
RSM7	YJR113C	Mitochondrial ribosomal protein of the small subunit, has similarity to E. coli S7 ribosomal protein	1.31133	1185	Yes
KGD2	YDR148C	Dihydrolipoyl transsuccinylase, component of the mitochondrial alpha-ketoglutarate dehydrogenase complex, which catalyzes the oxidative decarboxylation of alpha-ketoglutarate to succinyl-CoA in the TCA cycle; phosphorylated	1.311	1186	No
PMT2	YAL023C	Protein O-mannosyltransferase, transfers mannose residues from dolichyl phosphate-D-mannose to protein serine/threonine residues; acts in a complex with Pmt1p, can instead interact with Pmt5p in some conditions; target for new antifungals	1.311	1187	No
SFC1	YJR095W	Mitochondrial succinate-fumarate transporter, transports succinate into and fumarate out of the mitochondrion; required for ethanol and acetate utilization	1.311	1188	No
POP8	YBL018C	Subunit of both RNase MRP, which cleaves pre-rRNA, and nuclear RNase P, which cleaves tRNA precursors to generate mature 5' ends	1.31081	1189	Yes
VPS63	YLR261C	Dubious open reading frame, unlikely to encode a protein; not conserved in closely related Saccharomyces species; 98% of ORF overlaps the verified gene YPT6; deletion causes a vacuolar protein sorting defect	1.31067	1190	No
GPX1	YKL026C	Phospholipid hydroperoxide glutathione peroxidase induced by glucose starvation that protects cells from phospholipid hydroperoxides and nonphospholipid peroxides during oxidative stress	1.30967	1191	No
YLL047W	YLL047W	Dubious open reading frame unlikely to encode a protein, based on available experimental and comparative sequence data; partially overlaps verified gene RNP1	1.30967	1192	No
ECM14	YHR132C	Putative metalloprotease with similarity to the zinc carboxypeptidase family, required for normal cell wall assembly	1.30967	1193	No
CPR7	YJR032W	Peptidyl-prolyl cis-trans isomerase (cyclophilin), catalyzes the cis-trans isomerization of peptide bonds N-terminal to proline residues; binds to Hsp82p and contributes to chaperone activity	1.30967	1194	No
YJR124C	YJR124C	Putative protein of unknown function; expression induced under calcium shortage	1.30967	1195	No
RPS19A	YOL121C	Protein component of the small (40S) ribosomal subunit, required for assembly and maturation of pre-40 S particles; mutations in human RPS19 are associated with Diamond Blackfan anemia; nearly identical to Rps19Bp	1.30967	1196	Yes
FAS1	YKL182W	Beta subunit of fatty acid synthetase, which catalyzes the synthesis of long-chain saturated fatty acids; contains acetyltransacylase, dehydratase, enoyl reductase, malonyl transacylase, and palmitoyl transacylase activities	1.30967	1197	No
APM2	YHL019C	Protein of unknown function, homologous to the medium chain of mammalian clathrin-associated protein complex; involved in vesicular transport	1.30933	1198	No
SPC1	YJR010C-A	Subunit of the signal peptidase complex (SPC), which cleaves the signal sequence from proteins targeted to the endoplasmic reticulum (ER), homolog of the SPC12 subunit of mammalian signal peptidase complex	1.309	1199	No
YOR364W	YOR364W	Dubious open reading frame unlikely to encode a protein, based on available experimental and comparative sequence data; partially overlaps the uncharacterized ORF YOR365C	1.309	1200	No
DDI1	YER143W	DNA damage-inducible v-SNARE binding protein, contains a ubiquitin-associated (UBA) domain, may act as a negative regulator of constitutive exocytosis, may play a role in S-phase checkpoint control	1.3085	1201	No
YBR298C-A	YBR298C-A	Putative protein of unknown function; identified by gene-trapping, microarray-based expression analysis, and genome-wide homology searching	1.30833	1202	No
SPO77	YLR341W	Meiosis-specific protein of unknown function, required for spore wall formation during sporulation; dispensable for both nuclear divisions during meiosis	1.30767	1203	No
SPE3	YPR069C	Spermidine synthase, involved in biosynthesis of spermidine and also in biosynthesis of pantothenic acid; spermidine is required for growth of wild-type cells	1.307	1204	No
CAT2	YML042W	Carnitine acetyl-CoA transferase present in both mitochondria and peroxisomes, transfers activated acetyl groups to carnitine to form acetylcarnitine which can be shuttled across membranes	1.307	1205	No
VOA1	YGR106C	Endoplasmic reticulum protein that functions, together with other assembly factors, in assembly of the V0 sector of the vacuolar ATPase (V-ATPase); null mutation enhances the V-ATPase deficiency of a vma21 mutant impaired in ER retrieval	1.30533	1206	No
YLR132C	YLR132C	Essential protein of unknown function; fluorescent protein (GFP or YFP)-tagged protein localizes to mitochondria, cytoplasm and nucleus	1.305	1207	No
RKM4	YDR257C	Ribosomal lysine methyltransferase specific for monomethylation of Rpl42ap and Rpl42bp (lysine 55); nuclear SET-domain containing protein	1.305	1208	No
YER163C	YER163C	Putative protein of unknown function; green fluorescent protein (GFP)-fusion protein localizes to the cytoplasm and nucleus; periodically expressed during the metabolic cycle; weak similarity to bacterial cation transport protein	1.30467	1209	No
YLR326W	YLR326W	Putative protein of unknown function, predicted to be palmitoylated	1.30467	1210	No
KTI12	YKL110C	Protein that plays a role, with Elongator complex, in modification of wobble nucleosides in tRNA; involved in sensitivity to G1 arrest induced by zymocin; interacts with chromatin throughout the genome; also interacts with Cdc19p	1.30467	1211	No
HOS4	YIL112W	Subunit of the Set3 complex, which is a meiotic-specific repressor of sporulation specific genes that contains deacetylase activity; potential Cdc28p substrate	1.30467	1212	No
YIL060W	YIL060W	Putative protein of unknown function; mutant accumulates less glycogen than does wild type; null mutation results in a decrease in plasma membrane electron transport; YIL060W is not an essential gene	1.30467	1213	No
YHR177W	YHR177W	Putative protein of unknown function; overexpression causes a cell cycle delay or arrest	1.30467	1214	No
GSC2	YGR032W	Catalytic subunit of 1,3-beta-glucan synthase, involved in formation of the inner layer of the spore wall; activity positively regulated by Rho1p and negatively by Smk1p; has similarity to an alternate catalytic subunit, Fks1p (Gsc1p)	1.30467	1215	No
PET9	YBL030C	Major ADP/ATP carrier of the mitochondrial inner membrane, exchanges cytosolic ADP for mitochondrially synthesized ATP; phosphorylated; required for viability in many common lab strains carrying a mutation in the polymorphic SAL1 gene	1.304	1216	No
COQ6	YGR255C	Putative flavin-dependent monooxygenase, involved in ubiquinone (Coenzyme Q) biosynthesis; localizes to the matrix face of the mitochondrial inner membrane in a large complex with other ubiquinone biosynthetic enzymes	1.304	1217	No
MRF1	YGL143C	Mitochondrial translation release factor, involved in stop codon recognition and hydrolysis of the peptidyl-tRNA bond during mitochondrial translation; lack of MRF1 causes mitochondrial genome instability	1.30385	1218	Yes
NFU1	YKL040C	Protein involved in iron metabolism in mitochondria; similar to NifU, which is a protein required for the maturation of the Fe/S clusters of nitrogenase in nitrogen-fixing bacteria	1.30367	1219	No
FOL2	YGR267C	GTP-cyclohydrolase I, catalyzes the first step in the folic acid biosynthetic pathway	1.30367	1220	No
YBR184W	YBR184W	Putative protein of unknown function; YBR184W is not an essential gene	1.30267	1221	No
GRE3	YHR104W	Aldose reductase involved in methylglyoxal, d-xylose, arabinose, and galactose metabolism; stress induced (osmotic, ionic, oxidative, heat shock, starvation and heavy metals); regulated by the HOG pathway	1.30267	1222	No
RPL37B	YDR500C	Protein component of the large (60S) ribosomal subunit, has similarity to Rpl37Ap and to rat L37 ribosomal protein	1.30263	1223	Yes
YJR141W	YJR141W	Essential protein of unknown function	1.30233	1224	No
YJR157W	YJR157W	Dubious open reading frame unlikely to encode a functional protein, based on available experimental and comparative sequence data	1.30233	1225	No
TMA22	YJR014W	Protein of unknown function; associates with ribosomes and has a putative RNA binding domain; interacts with Tma20p; similar to human GRAP and human DRP1, which interacts with human Tma20p homolog MCT-1	1.30233	1226	Yes
TEL2	YGR099W	Essential DNA-binding protein specific to single-stranded yeast telomeric DNA repeats, required for telomere length regulation and telomere position effect	1.302	1227	No
DUS1	YML080W	Dihydrouridine synthase, member of a widespread family of conserved proteins including Smm1p, Dus3p, and Dus4p; modifies pre-tRNA(Phe) at U17	1.301	1228	Yes
YKL161C	YKL161C	Protein kinase implicated in the Slt2p mitogen-activated (MAP) kinase signaling pathway; associates with Rlm1p	1.301	1229	No
PRP5	YBR237W	RNA helicase in the DEAD-box family, necessary for prespliceosome formation, bridges U1 and U2 snRNPs and enables stable U2 snRNP association with intron RNA	1.30068	1230	Yes
PFA4	YOL003C	Palmitoyltransferase with autoacylation activity, required for palmitoylation of amino acid permeases containing a C-terminal Phe-Trp-Cys site; required for modification of Chs3p; member of the DHHC family of putative palmitoyltransferases	1.30067	1231	No
SRP1	YNL189W	Karyopherin alpha homolog, forms a dimer with karyopherin beta Kap95p to mediate import of nuclear proteins, binds the nuclear localization signal of the substrate during import; may also play a role in regulation of protein degradation	1.30067	1232	No
ECM8	YBR076W	Non-essential protein of unknown function	1.30067	1233	No
TRX1	YLR043C	Cytoplasmic thioredoxin isoenzyme of the thioredoxin system which protects cells against oxidative and reductive stress, forms LMA1 complex with Pbi2p, acts as a cofactor for Tsa1p, required for ER-Golgi transport and vacuole inheritance	1.30067	1234	No
TIM18	YOR297C	Component of the mitochondrial Tim54p-Tim22p complex involved in insertion of polytopic proteins into the inner membrane; may function to stabilize the complex	1.30067	1235	No
MLC2	YPR188C	Regulatory light chain for the type II myosin, Myo1p; binds to an IQ motif of Myo1p, localization to the bud neck depends on Myo1p; involved in the disassembly of the Myo1p ring	1.30033	1236	No
HEK2	YBL032W	RNA binding protein involved in the asymmetric localization of ASH1 mRNA; represses translation of ASH1 mRNA, an effect reversed by Yck1p-dependent phosphoryation; regulates telomere position effect and length; similarity to hnRNP-K	1.3	1237	Yes
PTP1	YDL230W	Phosphotyrosine-specific protein phosphatase that dephosphorylates a broad range of substrates in vivo, including Fpr3p; localized to the cytoplasm and the mitochondria	1.3	1238	No
KIN3	YAR018C	Nonessential protein kinase with unknown cellular role	1.29933	1239	No
ATS1	YAL020C	Protein required, with Elongator complex, Kti11p, and Kti12p, for modification of wobble nucleosides in tRNA; has a potential role in regulatory interactions between microtubules and the cell cycle	1.29933	1240	No
YGL102C	YGL102C	Dubious open reading frame unlikely to encode a functional protein; overlaps 3' end of essential RPL28 gene encoding a large subunit ribosomal protein	1.299	1241	No
MNS1	YJR131W	Alpha-1,2-mannosidase involved in ER quality control; catalyzes the removal of one mannose residue from Man9GlcNAc to produce a single isomer of Man8GlcNAc in N-linked oligosaccharide biosynthesis; integral to ER membrane	1.299	1242	No
CIT1	YNR001C	Citrate synthase, catalyzes the condensation of acetyl coenzyme A and oxaloacetate to form citrate; the rate-limiting enzyme of the TCA cycle; nuclear encoded mitochondrial protein	1.299	1243	No
PEX18	YHR160C	Peroxin required for targeting of peroxisomal matrix proteins containing PTS2; interacts with Pex7p; partially redundant with Pex21p	1.299	1244	No
CDA1	YLR307W	Chitin deacetylase, together with Cda2p involved in the biosynthesis ascospore wall component, chitosan; required for proper rigidity of the ascospore wall	1.299	1245	No
YLR346C	YLR346C	Putative protein of unknown function found in mitochondria; expression is regulated by transcription factors involved in pleiotropic drug resistance, Pdr1p and Yrr1p; YLR346C is not an essential gene	1.298	1246	No
YKL027W	YKL027W	Protein of unknown function, localized to the mitochondrial outer membrane	1.29733	1247	No
RPL38	YLR325C	Protein component of the large (60S) ribosomal subunit, has similarity to rat L38 ribosomal protein	1.2973	1248	Yes
CFD1	YIL003W	Highly conserved, iron-sulfur cluster binding protein localized in the cytoplasm; forms a complex with Nbp35p that is involved in iron-sulfur protein assembly in the cytosol	1.297	1249	No
AIM33	YML087C	Putative protein of unknown function, highly conserved across species and orthologous to human CYB5R4; null mutant displays reduced frequency of mitochondrial genome loss	1.297	1250	No
ABM1	YJR108W	Protein of unknown function, required for normal microtubule organization	1.297	1251	No
GGA2	YHR108W	Golgi-localized protein with homology to gamma-adaptin, interacts with and regulates Arf1p and Arf2p in a GTP-dependent manner in order to facilitate traffic through the late Golgi	1.297	1252	No
TIM10	YHR005C-A	Essential protein of the mitochondrial intermembrane space, forms a complex with Tim9p (TIM10 complex) that mediates insertion of hydrophobic proteins at the inner membrane, has homology to Mrs5p, which is also involved in this process	1.297	1253	No
ERV15	YBR210W	Protein involved in export of proteins from the endoplasmic reticulum, has similarity to Erv14p	1.297	1254	No
YOL159C	YOL159C	Soluble protein of unknown function; deletion mutants are viable and have elevated levels of Ty1 retrotransposition and Ty1 cDNA	1.29633	1255	No
YHR122W	YHR122W	Protein of unknown function required for establishment of sister chromatid cohesion; synthetically lethal with RFC5, an RF-C subunit that links replication to cohesion establishment; YHR122W is an essential gene	1.296	1256	No
PPA1	YHR026W	Subunit c'' of the vacuolar ATPase, which functions in acidification of the vacuole; one of three proteolipid subunits of the V0 domain	1.296	1257	No
YLR064W	YLR064W	Putative protein of unknown function; highly conserved across species and orthologous to human TMEM33; green fluorescent protein (GFP)-fusion protein localizes to the endoplasmic reticulum; YLR064W is not an essential gene	1.29567	1258	No
RPS25A	YGR027C	Protein component of the small (40S) ribosomal subunit; nearly identical to Rps25Bp and has similarity to rat S25 ribosomal protein	1.29533	1259	No
TRR2	YHR106W	Mitochondrial thioredoxin reductase involved in protection against oxidative stress, required with Glr1p to maintain the redox state of Trx3p; contains active-site motif (CAVC) present in prokaryotic orthologs; binds NADPH and FAD	1.295	1260	No
TRE1	YPL176C	Plasma membrane protein that binds to Bsd2p and regulates ubiquitylation and vacuolar degradation of the metal transporter Smf1p; function is redundant with that of Tre2p; has similarity to transferrin receptors	1.295	1261	No
GTR2	YGR163W	Putative GTP binding protein that negatively regulates Ran/Tc4 GTPase cycle; activates transcription; subunit of EGO and GSE complexes; required for sorting of Gap1p; localizes to cytoplasm and to chromatin; homolog of human RagC and RagD	1.295	1262	No
YJL032W	YJL032W	Dubious open reading frame unlikely to encode a functional protein; overlaps 3' end of essential BET4 gene encoding the alpha subunit of Type II geranylgeranyltransferase	1.295	1263	No
COX19	YLL018C-A	Protein required for cytochrome c oxidase assembly, located in the cytosol and mitochondrial intermembrane space; putative copper metallochaperone that delivers copper to cytochrome c oxidase	1.295	1264	No
EDC2	YER035W	RNA-binding protein, activates mRNA decapping directly by binding to the mRNA substrate and enhancing the activity of the decapping proteins Dcp1p and Dcp2p; has a role in translation during heat stress	1.29487	1265	Yes
MRPS9	YBR146W	Mitochondrial ribosomal protein of the small subunit	1.29467	1266	Yes
LAT1	YNL071W	Dihydrolipoamide acetyltransferase component (E2) of pyruvate dehydrogenase complex, which catalyzes the oxidative decarboxylation of pyruvate to acetyl-CoA	1.29467	1267	No
UTP5	YDR398W	Subunit of U3-containing Small Subunit (SSU) processome complex involved in production of 18S rRNA and assembly of small ribosomal subunit	1.29433	1268	Yes
YHL005C	YHL005C	Dubious open reading frame unlikely to encode a protein, based on available experimental and comparative sequence data; partially overlaps the verified ORF YHL004W	1.294	1269	No
STF1	YDL130W-A	Protein involved in regulation of the mitochondrial F1F0-ATP synthase; Stf1p and Stf2p may act as stabilizing factors that enhance inhibitory action of the Inh1p protein	1.29367	1270	No
UBP3	YER151C	Ubiquitin-specific protease that interacts with Bre5p to co-regulate anterograde and retrograde transport between endoplasmic reticulum and Golgi compartments; inhibitor of gene silencing; cleaves ubiquitin fusions but not polyubiquitin	1.29367	1271	No
FMP21	YBR269C	Putative protein of unknown function; the authentic, non-tagged protein is detected in highly purified mitochondria in high-throughput studies	1.29333	1272	No
YKL036C	YKL036C	Dubious open reading frame, unlikely to encode a protein; not conserved in closely related <i>Saccharomyces</i> species; partially overlaps the essential gene UGP1 gene and uncharacterized ORF YKL037W	1.29333	1273	No
RLP24	YLR009W	Essential protein with similarity to Rpl24Ap and Rpl24Bp, associated with pre-60S ribosomal subunits and required for ribosomal large subunit biogenesis	1.293	1274	Yes
YPL191C	YPL191C	Putative protein of unknown function; diploid deletion strain exhibits high budding index; green fluorescent protein (GFP)-fusion protein localizes to the cytoplasm	1.29267	1275	No
HDA1	YNL021W	Putative catalytic subunit of a class II histone deacetylase complex that also contains Hda2p and Hda3p; Hda1p interacts with the Hda2p-Hda3p subcomplex to form an active tetramer; deletion increases histone H2B, H3 and H4 acetylation	1.292	1276	No
APS2	YJR058C	Small subunit of the clathrin-associated adaptor complex AP-2, which is involved in protein sorting at the plasma membrane; related to the sigma subunit of the mammalian plasma membrane clathrin-associated protein (AP-2) complex	1.29167	1277	No
YOR228C	YOR228C	Protein of unknown function, localized to the mitochondrial outer membrane	1.291	1278	No
YIL058W	YIL058W	Dubious open reading frame unlikely to encode a functional protein, based on available experimental and comparative sequence data	1.29067	1279	No
YLR030W	YLR030W	Putative protein of unknown function	1.29067	1280	No
YJR111C	YJR111C	Putative protein of unknown function; green fluorescent protein (GFP)-fusion protein localizes to the mitochondria	1.29067	1281	No
MIM1	YOL026C	Mitochondrial outer membrane protein, required for assembly of the translocase of the outer membrane (TOM) complex and thereby for mitochondrial protein import; N terminus is exposed to the cytosol: transmembrane segment is highly conserved	1.29067	1282	No
SIP5	YMR140W	Protein of unknown function; interacts with both the Reg1p/Glc7p phosphatase and the Snf1p kinase	1.29	1283	No
AIM42	YOR286W	Protein of unknown function; overexpression causes a cell cycle delay; the authentic, non-tagged protein is detected in purified mitochondria in high-throughput studies; null mutant displays elevated frequency of mitochondrial genome loss	1.28967	1284	No
ERV14	YGL054C	Protein localized to COPII-coated vesicles, involved in vesicle formation and incorporation of specific secretory cargo; required for the delivery of bud-site selection protein Axl2p to cell surface; related to Drosophila cornichon	1.28967	1285	No
SRP21	YKL122C	Subunit of the signal recognition particle (SRP), which functions in protein targeting to the endoplasmic reticulum membrane; not found in mammalian SRP; forms a pre-SRP structure in the nucleolus that is translocated to the cytoplasm	1.28947	1286	Yes
YLR046C	YLR046C	Putative membrane protein; member of the fungal lipid-translocating exporter (LTE) family of proteins; transcription is activated by paralogous transcription factors Yrm1p and Yrr1p along with genes involved in multidrug resistance	1.289	1287	No
MGM101	YJR144W	Protein involved in mitochondrial genome maintenance; component of the mitochondrial nucleoid, required for the repair of oxidative mtDNA damage	1.289	1288	No
YPT31	YER031C	GTPase of the Ypt/Rab family, very similar to Ypt32p; involved in the exocytic pathway; mediates intra-Golgi traffic or the budding of post-Golgi vesicles from the trans-Golgi	1.289	1289	No
PWP1	YLR196W	Protein with WD-40 repeats involved in rRNA processing; associates with trans-acting ribosome biogenesis factors; similar to beta-transducin superfamily	1.28867	1290	Yes
FYV1	YDR024W	Dubious open reading frame, unlikely to encode a protein; not conserved in closely related Saccharomyces species; mutation decreases survival upon exposure to K1 killer toxin	1.28867	1291	No
FUS3	YBL016W	Mitogen-activated serine/threonine protein kinase involved in mating; phosphoactivated by Ste7p; substrates include Ste12p, Far1p, Bni1p, Sst2p; inhibits invasive growth during mating by phosphorylating Tec1p, promoting its degradation	1.28867	1292	No
YJR154W	YJR154W	Putative protein of unknown function; green fluorescent protein (GFP)-fusion protein localizes to the cytoplasm	1.28867	1293	No
PGD1	YGL025C	Subunit of the RNA polymerase II mediator complex; associates with core polymerase subunits to form the RNA polymerase II holoenzyme; essential for basal and activated transcription; direct target of Cyc8p-Tup1p transcriptional corepressor	1.28867	1294	No
YJR129C	YJR129C	Putative protein of unknown function; predicted S-adenosylmethionine-dependent methyltransferase of the seven beta-strand family; green fluorescent protein (GFP)-fusion protein localizes to the cytoplasm	1.28867	1295	No
DCR2	YLR361C	Phosphoesterase involved in downregulation of the unfolded protein response, at least in part via dephosphorylation of Ire1p; dosage-dependent positive regulator of the G1/S phase transition through control of the timing of START	1.28833	1296	No
YLL044W	YLL044W	Dubious open reading frame unlikely to encode a protein, based on available experimental and comparative sequence data; transcription of both YLL044W and the overlapping gene RPL8B is reduced in the gcr1 null mutant	1.28833	1297	No
DJP1	YIR004W	Cytosolic J-domain-containing protein, required for peroxisomal protein import and involved in peroxisome assembly, homologous to E. coli DnaJ	1.28833	1298	No
YKL177W	YKL177W	Dubious open reading frame unlikely to encode a protein, based on available experimental and comparative sequence data; partially overlaps the verified gene STE3	1.288	1299	No
MHT1	YLL062C	S-methylmethionine-homocysteine methyltransferase, functions along with Sam4p in the conversion of S-adenosylmethionine (AdoMet) to methionine to control the methionine/AdoMet ratio	1.28733	1300	No
ATH1	YPR026W	Acid trehalase required for utilization of extracellular trehalose	1.28733	1301	No
PBS2	YJL128C	MAP kinase kinase that plays a pivotal role in the osmosensing signal-transduction pathway, activated under severe osmotic stress; plays a role in regulating Ty1 transposition	1.28667	1302	No
EST1	YLR233C	TLC1 RNA-associated factor involved in telomere length regulation as the recruitment subunit of the telomerase holoenzyme, has a possible role in activating Est2p-TLC1-RNA bound to the telomere	1.2861	1303	Yes
YNL179C	YNL179C	Dubious open reading frame, unlikely to encode a protein; not conserved in closely related Saccharomyces species; deletion in cyr1 mutant results in loss of stress resistance	1.286	1304	No
YVH1	YIR026C	Protein phosphatase involved in vegetative growth at low temperatures, sporulation, and glycogen accumulation; transcription induced by low temperature and nitrogen starvation; member of the dual-specificity family of protein phosphatases	1.28567	1305	No
STE12	YHR084W	Transcription factor that is activated by a MAP kinase signaling cascade, activates genes involved in mating or pseudohyphal/invasive growth pathways; cooperates with Tec1p transcription factor to regulate genes specific for invasive growth	1.28567	1306	No
YAE1	YJR067C	Protein of unknown function, essential for growth under standard (aerobic) conditions but not under anaerobic conditions	1.28533	1307	No
YOR214C	YOR214C	Putative protein of unknown function; YOR214C is not an essential gene	1.285	1308	No
FYV5	YCL058C	Protein of unknown function, required for survival upon exposure to K1 killer toxin; involved in ion homeostasis	1.285	1309	No
EGD1	YPL037C	Subunit beta1 of the nascent polypeptide-associated complex (NAC) involved in protein targeting, associated with cytoplasmic ribosomes; enhances DNA binding of the Gal4p activator; homolog of human BTF3b	1.285	1310	No
LOT6	YLR011W	FMN-dependent NAD(P)H:quinone reductase, may be involved in quinone detoxification; expression elevated at low temperature; sequesters the Cin5p transcription factor in the cytoplasm in complex with the proteasome under reducing conditions	1.28433	1311	No
LST8	YNL006W	Protein required for the transport of amino acid permease Gap1p from the Golgi to the cell surface; component of the TOR signaling pathway; associates with both Tor1p and Tor2p; contains a WD-repeat	1.284	1312	No
TBF1	YPL128C	Telobox-containing general regulatory factor; binds to TTAGGG repeats within subtelomeric anti-silencing regions (STARs) and possibly throughout the genome and mediates their insulating capacity by blocking silent chromatin propagation	1.284	1313	No
ARG7	YMR062C	Mitochondrial ornithine acetyltransferase, catalyzes the fifth step in arginine biosynthesis; also possesses acetylglutamate synthase activity, regenerates acetylglutamate while forming ornithine	1.284	1314	No
YOR333C	YOR333C	Dubious open reading frame, unlikely to encode a functional protein; overlaps 5' end of MRS2 gene required for respiratory growth	1.284	1315	No
SPE1	YKL184W	Ornithine decarboxylase, catalyzes the first step in polyamine biosynthesis; degraded in a proteasome-dependent manner in the presence of excess polyamines	1.28367	1316	No
FPS1	YLL043W	Plasma membrane channel, member of major intrinsic protein (MIP) family; involved in efflux of glycerol and in uptake of acetic acid and the trivalent metalloids arsenite and antimonite; phosphorylated by Hog1p MAPK under acetate stress	1.28367	1317	No
CMD1	YBR109C	Calmodulin; Ca++ binding protein that regulates Ca++ independent processes (mitosis, bud growth, actin organization, endocytosis, etc.) and Ca++ dependent processes (stress-activated pathways), targets include Nuf1p, Myo2p and calcineurin	1.28367	1318	No
MIG2	YGL209W	Protein containing zinc fingers, involved in repression, along with Mig1p, of SUC2 (invertase) expression by high levels of glucose; binds to Mig1p-binding sites in SUC2 promoter	1.28333	1319	No
AHA1	YDR214W	Co-chaperone that binds to Hsp82p and activates its ATPase activity; similar to Hch1p; expression is regulated by stresses such as heat shock	1.28333	1320	No
YGR064W	YGR064W	Dubious open reading frame unlikely to encode a protein, based on available experimental and comparative sequence data; partially overlaps the verified ORF SPT4/YGR063C	1.28333	1321	No
YER087C-A	YER087C-A	Dubious open reading frame unlikely to encode a protein, based on experimental and comparative sequence data; overlaps the uncharacterized gene YER087W, a putative tRNA synthetase	1.28333	1322	No
TRS20	YBR254C	One of 10 subunits of the transport protein particle (TRAPP) complex of the cis-Golgi which mediates vesicle docking and fusion; mutations in the human homolog cause the spondyloepiphyseal dysplasia tarda (SEDL) disorder	1.28333	1323	No
YDR034W-B	YDR034W-B	Protein of unknown function; green fluorescent protein (GFP)-fusion protein localizes to the cell periphery	1.283	1324	No
INM1	YHR046C	Inositol monophosphatase, involved in biosynthesis of inositol and in phosphoinositide second messenger signaling; INM1 expression increases in the presence of inositol and decreases upon exposure to antibipolar drugs lithium and valproate	1.283	1325	No
YGL015C	YGL015C	Hypothetical protein	1.283	1326	No
DOS2	YDR068W	Protein of unknown function, green fluorescent protein (GFP)-fusion protein localizes to the cytoplasm	1.28267	1327	No
PUG1	YER185W	Plasma membrane protein with roles in the uptake of protoprophyrin IX and the efflux of heme; expression is induced under both low-heme and low-oxygen conditions; member of the fungal lipid-translocating exporter (LTE) family of proteins	1.28267	1328	No
SNX3	YOR357C	Sorting nexin required to maintain late-Golgi resident enzymes in their proper location by recycling molecules from the prevacuolar compartment; contains a PX domain and sequence similarity to human Snx3p	1.28267	1329	No
PPM2	YOL141W	AdoMet-dependent tRNA methyltransferase also involved in methoxycarbonylation; required for the synthesis of wybutosine (yW), a modified guanosine found at the 3'-position adjacent to the anticodon of phe-tRNA; similarity to Ppm1p	1.28267	1330	Yes
VMA6	YLR447C	Subunit d of the five-subunit V0 integral membrane domain of vacuolar H+-ATPase (V-ATPase), an electrogenic proton pump found in the endomembrane system; stabilizes VO subunits; required for V1 domain assembly on the vacuolar membrane	1.282	1331	No
SAY1	YGR263C	Sterol deacetylase; component of the sterol acetylation/deacetylation cycle along with Atf2p; integral membrane protein with active site in the ER lumen; green fluorescent protein (GFP)-fusion protein localizes to the endoplasmic reticulum	1.282	1332	No
MPM1	YJL066C	Mitochondrial membrane protein of unknown function, contains no hydrophobic stretches	1.282	1333	No
YOL029C	YOL029C	Putative protein of unknown function; identified as interacting with Hsc82p and Hsp82p in high-throughput two-hybrid screens	1.28167	1334	No
MMT2	YPL224C	Putative metal transporter involved in mitochondrial iron accumulation; closely related to Mmt1p	1.28133	1335	No
GIR2	YDR152W	Highly-acidic cytoplasmic RWD domain-containing protein of unknown function; interacts with Rbg1p and Gcn1p; associates with translating ribosomes; putative intrinsically unstructured protein	1.28067	1336	No
THR4	YCR053W	Threonine synthase, conserved protein that catalyzes formation of threonine from 0-phosphohomoserine; expression is regulated by the GCN4-mediated general amino acid control pathway	1.28033	1337	No
SRP54	YPR088C	Signal recognition particle (SRP) subunit (homolog of mammalian SRP54); contains the signal sequence-binding activity of SRP, interacts with the SRP RNA, and mediates binding of SRP to signal receptor; contains GTPase domain	1.28	1338	Yes
YFL054C	YFL054C	Putative channel-like protein; similar to Fps1p; mediates passive diffusion of glycerol in the presence of ethanol	1.27933	1339	No
YHR003C	YHR003C	Protein of unknown function, localized to the mitochondrial outer membrane	1.27933	1340	No
TPO1	YLL028W	Polyamine transporter that recognizes spermine, putrescine, and spermidine; catalyzes uptake of polyamines at alkaline pH and excretion at acidic pH; phosphorylation enhances activity and sorting to the plasma membrane	1.27933	1341	No
YPL056C	YPL056C	Putative protein of unknown function; deletion mutant is fluconazole resistant	1.279	1342	No
OST2	YOR103C	Epsilon subunit of the oligosaccharyltransferase complex of the ER lumen, which catalyzes asparagine-linked glycosylation of newly synthesized proteins	1.279	1343	No
PTK2	YJR059W	Putative serine/threonine protein kinase involved in regulation of ion transport across plasma membrane; enhances spermine uptake	1.279	1344	No
BCD1	YHR040W	Essential protein required for the accumulation of box C/D snoRNA	1.279	1345	No
CSE4	YKL049C	Centromere protein that resembles histone H3, required for proper kinetochore function; homolog of human CENP-A	1.279	1346	No
SSP120	YLR250W	Protein of unknown function; green fluorescent protein (GFP)-fusion protein localizes to the cytoplasm in a punctate pattern	1.279	1347	No
ILM1	YJR118C	Protein of unknown function; may be involved in mitochondrial DNA maintenance; required for slowed DNA synthesis-induced filamentous growth	1.27833	1348	No
SEN34	YAR008W	Subunit of the tRNA splicing endonuclease, which is composed of Sen2p, Sen15p, Sen34p, and Sen54p; Sen34p contains the active site for tRNA 3' splice site cleavage and has similarity to Sen2p and to Archaeal tRNA splicing endonuclease	1.27778	1349	Yes
RDS1	YCR106W	Zinc cluster transcription factor involved in conferring resistance to cycloheximide	1.27767	1350	No
USE1	YGL098W	Essential SNARE protein localized to the ER, involved in retrograde traffic from the Golgi to the ER; forms a complex with the SNAREs Sec22p, Sec20p and Ufe1p	1.27767	1351	No
YMR187C	YMR187C	Putative protein of unknown function; YMR187C is not an essential gene	1.27767	1352	No
MCM21	YDR318W	Protein involved in minichromosome maintenance; component of the COMA complex (Ctf19p, Okp1p, Mcm21p, Ame1p) that bridges kinetochore subunits that are in contact with centromeric DNA and the subunits bound to microtubules	1.27767	1353	No
YDR034C-C	YDR034C-C	Retrotransposon TYA Gag gene co-transcribed with TYB Pol; translated as TYA or TYA-TYB polyprotein; Gag is a nucleocapsid protein that is the structural constituent of virus-like particles (VLPs); similar to retroviral Gag	1.27767	1354	Yes
YPR039W	YPR039W	Dubious open reading frame unlikely to encode a protein, based on available experimental and comparative sequence data; partially overlaps the verified non essential genes ERV2/YPR037C and TIP41/YPR040W	1.27767	1355	No
YOR289W	YOR289W	Putative protein of unknown function; transcription induced by the unfolded protein response; green fluorescent protein (GFP)-fusion protein localizes to both the cytoplasm and the nucleus	1.27767	1356	No
DID2	YKR035W-A	Class E protein of the vacuolar protein-sorting (Vps) pathway; binds Vps4p and directs it to dissociate ESCRT-III complexes; forms a functional and physical complex with Ist1p; human ortholog may be altered in breast tumors	1.277	1357	No
LAP2	YNL045W	Leucyl aminopeptidase yscIV (leukotriene A4 hydrolase) with epoxide hydrolase activity, metalloenzyme containing one zinc atom; green fluorescent protein (GFP)-fusion protein localizes to the cytoplasm and nucleus	1.277	1358	No
SOL4	YGR248W	6-phosphogluconolactonase with similarity to Sol3p	1.277	1359	No
YLR049C	YLR049C	Putative protein of unknown function	1.277	1360	No
YPL150W	YPL150W	Putative protein kinase of unknown cellular role	1.27667	1361	No
YJL175W	YJL175W	Dubious open reading frame unlikely to encode a functional protein; deletion confers resistance to cisplatin, hypersensitivity to 5-fluorouracil, and growth defect at high pH with high calcium; overlaps gene for SWI3 transcription factor	1.27667	1362	No
DUS3	YLR401C	Dihydrouridine synthase, member of a widespread family of conserved proteins including Smm1p, Dus1p, and Dus4p; contains a consensus oleate response element (ORE) in its promoter region	1.27667	1363	Yes
AIM26	YKL037W	Putative protein of unknown function; null mutant is viable and displays elevated frequency of mitochondrial genome loss; null mutation confers sensitivity to tunicamycin and DTT	1.27667	1364	No
SDS22	YKL193C	Conserved nuclear regulatory subunit of Glc7p type 1 protein serine-threonine phosphatase (PP1), functions positively with Glc7p to promote dephosphorylation of nuclear substrates required for chromosome transmission during mitosis	1.27633	1365	No
YRA2	YKL214C	Member of the REF (RNA and export factor binding proteins) family; when overexpressed, can substitute for the function of Yra1p in export of poly(A)+ mRNA from the nucleus	1.27632	1366	Yes
GRX4	YER174C	Hydroperoxide and superoxide-radical responsive glutathione-dependent oxidoreductase; monothiol glutaredoxin subfamily member along with Grx3p and Grx5p; protects cells from oxidative damage	1.275	1367	No
MPS2	YGL075C	Essential membrane protein localized at the nuclear envelope and spindle pole body (SPB), required for insertion of the newly duplicated SPB into the nuclear envelope; potentially phosphorylated by Cdc28p	1.27467	1368	No
SCP1	YOR367W	Component of yeast cortical actin cytoskeleton, binds and cross links actin filaments; originally identified by its homology to calponin (contains a calponin-like repeat) but the Scp1p domain structure is more similar to transgelin	1.27333	1369	No
RAT1	YOR048C	Nuclear 5' to 3' single-stranded RNA exonuclease, involved in RNA metabolism, including rRNA and snRNA processing as well as mRNA transcription termination	1.27333	1370	Yes
COX23	YHR116W	Mitochondrial intermembrane space protein that functions in mitochondrial copper homeostasis, essential for functional cytochrome oxidase expression; homologous to Cox17p	1.27333	1371	No
YGL204C	YGL204C	Dubious open reading frame unlikely to encode a functional protein, based on available experimental and comparative sequence data	1.27333	1372	No
FSH1	YHR049W	Putative serine hydrolase that localizes to both the nucleus and cytoplasm; sequence is similar to S. cerevisiae Fsh2p and Fsh3p and the human candidate tumor suppressor OVCA2	1.27333	1373	No
BAS1	YKR099W	Myb-related transcription factor involved in regulating basal and induced expression of genes of the purine and histidine biosynthesis pathways; also involved in regulation of meiotic recombination at specific genes	1.27333	1374	No
JJJ3	YJR097W	Protein of unknown function, contains a J-domain, which is a region with homology to the E. coli DnaJ protein	1.273	1375	No
RPN13	YLR421C	Subunit of the 19S regulatory particle of the 26S proteasome lid; acts as a ubiquitin receptor for the proteasome; null mutants accumulate ubiquitinated Gcn4p and display decreased 26S proteasome stability	1.273	1376	No
ITR2	YOL103W	Myo-inositol transporter with strong similarity to the major myo-inositol transporter Itr1p, member of the sugar transporter superfamily; expressed constitutively	1.273	1377	No
GRX1	YCL035C	Hydroperoxide and superoxide-radical responsive heat-stable glutathione-dependent disulfide oxidoreductase with active site cysteine pair; protects cells from oxidative damage	1.273	1378	No
OCH1	YGL038C	Mannosyltransferase of the cis-Golgi apparatus, initiates the polymannose outer chain elongation of N-linked oligosaccharides of glycoproteins	1.273	1379	No
RPS0B	YLR048W	Protein component of the small (40S) ribosomal subunit, nearly identical to Rps0Ap; required for maturation of 18S rRNA along with Rps0Ap; deletion of either RPS0 gene reduces growth rate, deletion of both genes is lethal	1.2729	1380	Yes
YEF3	YLR249W	Translational elongation factor 3, stimulates the binding of aminoacyl-tRNA (AA-tRNA) to ribosomes by releasing EF-1 alpha from the ribosomal complex; contains two ABC cassettes; binds and hydrolyses ATP	1.27267	1381	Yes
NGL1	YOL042W	Putative endonuclease, has a domain similar to a magnesium-dependent endonuclease motif in mRNA deadenylase Ccr4p; the authentic, non-tagged protein is detected in highly purified mitochondria in high-throughput studies	1.27233	1382	No
YBL070C	YBL070C	Dubious open reading frame unlikely to encode a protein, based on available experimental and comparative sequence data	1.27233	1383	No
SSD1	YDR293C	Protein with a role in maintenance of cellular integrity, interacts with components of the TOR pathway; ssd1 mutant of a clinical S. cerevisiae strain displays elevated virulence	1.272	1384	Yes
LYS4	YDR234W	Homoaconitase, catalyzes the conversion of homocitrate to homoisocitrate, which is a step in the lysine biosynthesis pathway	1.27133	1385	No
AIM4	YBR194W	Protein proposed to be associated with the nuclear pore complex; null mutant is viable, displays elevated frequency of mitochondrial genome loss and is sensitive to freeze-thaw stress	1.27133	1386	No
YJR096W	YJR096W	Putative xylose and arabinose reductase; member of the aldo-keto reductase (AKR) family; GFP-fusion protein is induced in response to the DNA-damaging agent MMS	1.27133	1387	No
CKA1	YIL035C	Alpha catalytic subunit of casein kinase 2, a Ser/Thr protein kinase with roles in cell growth and proliferation; the holoenzyme also contains CKA2, CKB1 and CKB2, the many substrates include transcription factors and all RNA polymerases	1.27133	1388	No
COS9	YKL219W	Protein of unknown function, member of the DUP380 subfamily of conserved, often subtelomerically-encoded proteins	1.27133	1389	No
QRI5	YLR204W	Mitochondrial inner membrane protein, required for accumulation of spliced COX1 mRNA; may have an additional role in translation of COX1 mRNA	1.27133	1390	No
YBR226C	YBR226C	Dubious open reading frame unlikely to encode a protein, based on available experimental and comparative sequence data; partially overlaps the uncharacterized ORF YBR225W	1.27133	1391	No
YNR005C	YNR005C	Dubious open reading frame unlikely to encode a functional protein, based on available experimental and comparative sequence data	1.27133	1392	No
YKL091C	YKL091C	Putative homolog of Sec14p, which is a phosphatidylinositol/phosphatidylcholine transfer protein involved in lipid metabolism; localizes to the nucleus	1.27133	1393	No
PET127	YOR017W	Protein with a role in 5'-end processing of mitochondrial RNAs, located in the mitochondrial membrane	1.27133	1394	Yes
HXT10	YFL011W	Putative hexose transporter, expressed at low levels and expression is repressed by glucose	1.27133	1395	No
CDC28	YBR160W	Catalytic subunit of the main cell cycle cyclin-dependent kinase (CDK); alternately associates with G1 cyclins (CLNs) and G2/M cyclins (CLBs) which direct the CDK to specific substrates	1.27133	1396	No
HUR1	YGL168W	Protein of unknown function; reported null mutant phenotype of hydroxyurea sensitivity may be due to effects on overlapping PMR1 gene	1.27067	1397	No
UBP9	YER098W	Ubiquitin carboxyl-terminal hydrolase, ubiquitin-specific protease that cleaves ubiquitin-protein fusions	1.27033	1398	No
ISA1	YLL027W	Mitochondrial matrix protein involved in biogenesis of the iron-sulfur (Fe/S) cluster of Fe/S proteins, isa1 deletion causes loss of mitochondrial DNA and respiratory deficiency; depletion reduces growth on nonfermentable carbon sources	1.27033	1399	No
YCL046W	YCL046W	Dubious open reading frame unlikely to encode a protein, based on available experimental and comparative sequence data; partially overlaps the uncharacterized ORF YCL045C	1.27033	1400	No
LYS20	YDL182W	Homocitrate synthase isozyme, catalyzes the condensation of acetyl-CoA and alpha-ketoglutarate to form homocitrate, which is the first step in the lysine biosynthesis pathway; highly similar to the other isozyme, Lys21p	1.27033	1401	No
RPT1	YKL145W	One of six ATPases of the 19S regulatory particle of the 26S proteasome involved in the degradation of ubiquitinated substrates; required for optimal CDC20 transcription; interacts with Rpn12p and the E3 ubiquitin-protein ligase Ubr1p	1.27	1402	No
RPL14B	YHL001W	Protein component of the large (60S) ribosomal subunit, nearly identical to Rpl14Ap and has similarity to rat L14 ribosomal protein	1.26967	1403	Yes
DON1	YDR273W	Meiosis-specific component of the spindle pole body, part of the leading edge protein (LEP) coat, forms a ring-like structure at the leading edge of the prospore membrane during meiosis II	1.26933	1404	No
BRF1	YGR246C	TFIIIB B-related factor, one of three subunits of RNA polymerase III transcription initiation factor TFIIIB, binds TFIIIC and TBP and recruits RNA pol III to promoters, amino-terminal half is homologous to TFIIB	1.26933	1405	No
RTT102	YGR275W	Component of both the SWI/SNF and RSC chromatin remodeling complexes, suggested role in chromosome maintenance; possible weak regulator of Ty1 transposition	1.26933	1406	No
YGR265W	YGR265W	Dubious open reading frame unlikely to encode a protein, based on available experimental and comparative sequence data; partially overlaps the verified ORF MES1/YGR264C, which encodes methionyl-tRNA synthetase	1.26933	1407	No
TIF1	YKR059W	Translation initiation factor eIF4A, identical to Tif2p; DEA(D/H)-box RNA helicase that couples ATPase activity to RNA binding and unwinding; forms a dumbbell structure of two compact domains connected by a linker; interacts with eIF4G	1.26933	1408	Yes
MTQ2	YDR140W	S-adenosylmethionine-dependent methyltransferase of the seven beta-strand family; subunit of complex with Trm112p that methylates translation release factor Sup45p (eRF1) in the ternary complex eRF1-eRF3-GTP; similar to E.coli PrmC	1.26933	1409	No
YDR286C	YDR286C	Putative protein of unknown function; predicted to have thiol-disulfide oxidoreductase active site	1.26933	1410	No
RAD30	YDR419W	DNA polymerase eta, involved in the predominantly error-free bypass replication of DNA lesions, catalyzes the efficient and accurate synthesis of DNA opposite cyclobutane pyrimidine dimers; homolog of human POLH and bacterial DinB proteins	1.26933	1411	No
NPA3	YJR072C	Essential, conserved, cytoplasmic ATPase; phosphorylated by the Pcl1p-Pho85p kinase complex	1.26867	1412	No
YKL050C	YKL050C	Protein of unknown function; the YKL050W protein is a target of the SCFCdc4 ubiquitin ligase complex and YKL050W transcription is regulated by Azf1p	1.26867	1413	No
MUP3	YHL036W	Low affinity methionine permease, similar to Mup1p	1.26867	1414	No
YBR074W	YBR074W	Putative metalloprotease	1.268	1415	No
POL1	YNL102W	Catalytic subunit of the DNA polymerase I alpha-primase complex, required for the initiation of DNA replication during mitotic DNA synthesis and premeiotic DNA synthesis	1.26733	1416	No
SET4	YJL105W	Protein of unknown function, contains a SET domain	1.26733	1417	No
TAD3	YLR316C	Subunit of tRNA-specific adenosine-34 deaminase, forms a heterodimer with Tad2p that converts adenosine to inosine at the wobble position of several tRNAs	1.26733	1418	Yes
EUG1	YDR518W	Protein disulfide isomerase of the endoplasmic reticulum lumen, function overlaps with that of Pdi1p; may interact with nascent polypeptides in the ER	1.26733	1419	No
RPL11A	YPR102C	Protein component of the large (60S) ribosomal subunit, nearly identical to Rpl11Bp; involved in ribosomal assembly; depletion causes degradation of proteins and RNA of the 60S subunit; has similarity to E. coli L5 and rat L11	1.26707	1420	Yes
UTP11	YKL099C	Subunit of U3-containing Small Subunit (SSU) processome complex involved in production of 18S rRNA and assembly of small ribosomal subunit	1.267	1421	Yes
GYP5	YPL249C	GTPase-activating protein (GAP) for yeast Rab family members, involved in ER to Golgi trafficking; exhibits GAP activity toward Ypt1p that is stimulated by Gyl1p, also acts on Sec4p; interacts with Gyl1p, Rvs161p and Rvs167p	1.267	1422	No
YDR509W	YDR509W	Dubious open reading frame unlikely to encode a functional protein, based on available experimental and comparative sequence data	1.267	1423	No
MGR2	YPL098C	Protein required for growth of cells lacking the mitochondrial genome	1.26667	1424	No
SPO7	YAL009W	Putative regulatory subunit of Nem1p-Spo7p phosphatase holoenzyme, regulates nuclear growth by controlling phospholipid biosynthesis, required for normal nuclear envelope morphology, premeiotic replication, and sporulation	1.26667	1425	No
YKR051W	YKR051W	Putative protein of unknown function	1.26667	1426	No
UBP15	YMR304W	Ubiquitin-specific protease that may play a role in ubiquitin precursor processing	1.266	1427	No
PEX30	YLR324W	Peroxisomal integral membrane protein, involved in negative regulation of peroxisome number; partially functionally redundant with Pex31p; genetic interactions suggest action at a step downstream of steps mediated by Pex28p and Pex29p	1.26567	1428	No
NEM1	YHR004C	Probable catalytic subunit of Nem1p-Spo7p phosphatase holoenzyme; regulates nuclear growth by controlling phospholipid biosynthesis, required for normal nuclear envelope morphology and sporulation; homolog of the human protein Dullard	1.26567	1429	No
YBR075W	YBR075W	Putative metalloprotease	1.265	1430	No
YAL064C-A	YAL064C-A	Putative protein of unknown function; YAL064C-A is not an essential gene	1.265	1431	No
RVS161	YCR009C	Amphiphysin-like lipid raft protein; interacts with Rvs167p and regulates polarization of the actin cytoskeleton, endocytosis, cell polarity, cell fusion and viability following starvation or osmotic stress	1.265	1432	No
SSH1	YBR283C	Subunit of the Ssh1 translocon complex; Sec61p homolog involved in co-translational pathway of protein translocation; not essential	1.2645	1433	No
SPC34	YKR037C	Essential subunit of the Dam1 complex (aka DASH complex), couples kinetochores to the force produced by MT depolymerization thereby aiding in chromosome segregation; also localized to nuclear side of spindle pole body	1.26433	1434	No
YGL199C	YGL199C	Dubious open reading frame unlikely to encode a protein, based on available experimental and comparative sequence data; partially overlaps the verified ORF YIP4/YGL198W	1.26433	1435	No
PRP46	YPL151C	Splicing factor that is found in the Cef1p subcomplex of the spliceosome	1.26334	1436	Yes
SYF2	YGR129W	Component of the spliceosome complex involved in pre-mRNA splicing; involved in regulation of cell cycle progression	1.26316	1437	Yes
RPP1A	YDL081C	Ribosomal stalk protein P1 alpha, involved in the interaction between translational elongation factors and the ribosome; accumulation of P1 in the cytoplasm is regulated by phosphorylation and interaction with the P2 stalk component	1.26316	1438	Yes
YPL279C	YPL279C	Putative protein of unknown function	1.263	1439	No
CDC3	YLR314C	Component of the septin ring of the mother-bud neck that is required for cytokinesis; septins recruit proteins to the neck and can act as a barrier to diffusion at the membrane, and they comprise the 10nm filaments seen with EM	1.263	1440	No
RPS4B	YHR203C	Protein component of the small (40S) ribosomal subunit; identical to Rps4Ap and has similarity to rat S4 ribosomal protein	1.263	1441	Yes
DDP1	YOR163W	Polyphosphate phosphatase; hydrolyzes diphosphorylated inositol polyphosphates and diadenosine polyphosphates; has high specificity for diadenosine hexa- and pentaphosphates; member of the MutT family of nucleotide hydrolases	1.263	1442	No
YKL169C	YKL169C	Dubious open reading frame unlikely to encode a protein, based on available experimental and comparative sequence data; partially overlaps the verified gene MRPL38	1.263	1443	No
CRT10	YOL063C	Protein involved in transcriptional regulation of RNR2 and RNR3; expression of the gene is induced by DNA damage and null mutations confer increased resistance to hydroxyurea; N-terminal region has a leucine repeat and a WD40 repeat	1.263	1444	No
SMX3	YPR182W	Core Sm protein Sm F; part of heteroheptameric complex (with Smb1p, Smd1p, Smd2p, Smd3p, Sme1p, and Smx2p) that is part of the spliceosomal U1, U2, U4, and U5 snRNPs; homolog of human Sm F	1.263	1445	Yes
LSM7	YNL147W	Lsm (Like Sm) protein; part of heteroheptameric complexes (Lsm2p-7p and either Lsm1p or 8p): cytoplasmic Lsm1p complex involved in mRNA decay; nuclear Lsm8p complex part of U6 snRNP and possibly involved in processing tRNA, snoRNA, and rRNA	1.2625	1446	Yes
ANP1	YEL036C	Subunit of the alpha-1,6 mannosyltransferase complex; type II membrane protein; has a role in retention of glycosyltransferases in the Golgi; involved in osmotic sensitivity and resistance to aminonitrophenyl propanediol	1.262	1447	No
ASR1	YPR093C	Ubiquitin ligase that modifies and regulates RNA Pol II; involved in a putative alcohol-responsive signaling pathway; accumulates in the nucleus under alcohol stress; contains a Ring/PHD finger domain similar to the mammalian rA9 protein	1.262	1448	No
ATP11	YNL315C	Molecular chaperone, required for the assembly of alpha and beta subunits into the F1 sector of mitochondrial F1F0 ATP synthase	1.26133	1449	No
PRM8	YGL053W	Pheromone-regulated protein with 2 predicted transmembrane segments and an FF sequence, a motif involved in COPII binding; forms a complex with Prp9p in the ER; member of DUP240 gene family	1.26133	1450	No
PIB2	YGL023C	Protein binding phosphatidylinositol 3-phosphate, involved in telomere-proximal repression of gene expression; similar to Fab1 and Vps27	1.26133	1451	No
AIM3	YBR108W	Protein interacting with Rvs167p; null mutant is viable and displays elevated frequency of mitochondrial genome loss	1.26133	1452	No
ARB1	YER036C	ATPase of the ATP-binding cassette (ABC) family involved in 40S and 60S ribosome biogenesis, has similarity to Gcn20p; shuttles from nucleus to cytoplasm, physically interacts with Tif6p, Lsg1p	1.261	1453	No
LDB7	YBL006C	Component of the RSC chromatin remodeling complex; interacts with Rsc3p, Rsc30p, Npl6p, and Htl1p to form a module important for a broad range of RSC functions	1.261	1454	No
GRX2	YDR513W	Cytoplasmic glutaredoxin, thioltransferase, glutathione-dependent disulfide oxidoreductase involved in maintaining redox state of target proteins, also exhibits glutathione peroxidase activity, expression induced in response to stress	1.26067	1455	No
RSM26	YJR101W	Mitochondrial ribosomal protein of the small subunit	1.26067	1456	No
ABF2	YMR072W	Mitochondrial DNA-binding protein involved in mitochondrial DNA replication and recombination, member of HMG1 DNA-binding protein family; activity may be regulated by protein kinase A phosphorylation	1.26067	1457	No
YGL042C	YGL042C	Dubious open reading frame, not conserved in closely related Saccharomyces species; deletion mutation blocks replication of Brome mosaic virus in S. cerevisiae, but this is likely due to effects on the overlapping gene DST1	1.26067	1458	No
ARG8	YOL140W	Acetylornithine aminotransferase, catalyzes the fourth step in the biosynthesis of the arginine precursor ornithine	1.2605	1459	No
YJL215C	YJL215C	Dubious open reading frame unlikely to encode a protein, based on available experimental and comparative sequence data	1.26033	1460	No
YMR114C	YMR114C	Protein of unknown function; may interact with ribosomes, based on co-purification experiments; green fluorescent protein (GFP)-fusion protein localizes to the nucleus and cytoplasm; YMR114C is not an essential gene	1.26033	1461	No
TCP1	YDR212W	Alpha subunit of chaperonin-containing T-complex, which mediates protein folding in the cytosol; involved in actin cytoskeleton maintenance; overexpression in neurons suppresses formation of pathogenic conformations of huntingtin protein	1.26033	1462	No
CDC40	YDR364C	Pre-mRNA splicing factor, important for catalytic step II of pre-mRNA splicing and plays a role in cell cycle progression; required for DNA synthesis during mitosis and meiosis; has WD repeats	1.26012	1463	Yes
TRS31	YDR472W	One of 10 subunits of the transport protein particle (TRAPP) complex of the cis-Golgi which mediates vesicle docking and fusion; involved in endoplasmic reticulum (ER) to Golgi membrane traffic	1.25967	1464	No
ALO1	YML086C	D-Arabinono-1,4-lactone oxidase, catalyzes the final step in biosynthesis of dehydro-D-arabinono-1,4-lactone, which is protective against oxidative stress	1.25933	1465	No
YLR296W	YLR296W	Dubious open reading frame unlikely to encode a protein, based on available experimental and comparative sequence data	1.25933	1466	No
PRO2	YOR323C	Gamma-glutamyl phosphate reductase, catalyzes the second step in proline biosynthesis	1.259	1467	No
YDR535C	YDR535C	Dubious open reading frame unlikely to encode a protein, based on available experimental and comparative sequence data; YDR535C is not an essential gene.	1.25833	1468	No
ASN1	YPR145W	Asparagine synthetase, isozyme of Asn2p; catalyzes the synthesis of L-asparagine from L-aspartate in the asparagine biosynthetic pathway	1.25833	1469	No
CDC42	YLR229C	Small rho-like GTPase, essential for establishment and maintenance of cell polarity; mutants have defects in the organization of actin and septins	1.25833	1470	No
CDC11	YJR076C	Component of the septin ring of the mother-bud neck that is required for cytokinesis; septins recruit proteins to the neck and can act as a barrier to diffusion at the membrane, and they comprise the 10nm filaments seen with EM	1.258	1471	No
PSY3	YLR376C	Protein involved in a Rad51p-, Rad54p-dependent pathway for homologous recombination repair; deletion results in a mutator phenotype; deletion increases sensitivity to anticancer drugs oxaliplatin and cisplatin but not mitomycin C	1.258	1472	No
PHB2	YGR231C	Subunit of the prohibitin complex (Phb1p-Phb2p), a 1.2 MDa ring-shaped inner mitochondrial membrane chaperone that stabilizes newly synthesized proteins; determinant of replicative life span; involved in mitochondrial segregation	1.258	1473	No
YIL108W	YIL108W	Putative metalloprotease	1.25767	1474	No
FSF1	YOR271C	Putative protein, predicted to be an alpha-isopropylmalate carrier; belongs to the sideroblastic-associated protein family; non-tagged protein is detected in purified mitochondria; likely to play a role in iron homeostasis	1.257	1475	No
TFC6	YDR362C	One of six subunits of RNA polymerase III transcription initiation factor complex (TFIIIC); part of TFIIIC TauB domain that binds BoxB promoter sites of tRNA and other genes; cooperates with Tfc3p in DNA binding; human homolog is TFIIIC-110	1.257	1476	No
HMG2	YLR450W	One of two isozymes of HMG-CoA reductase that convert HMG-CoA to mevalonate, a rate-limiting step in sterol biosynthesis; overproduction induces assembly of peripheral ER membrane arrays and short nuclear-associated membrane stacks	1.257	1477	No
SDS23	YGL056C	One of two S. cerevisiae homologs (Sds23p and Sds24p) of the S. pombe Sds23 protein, which is implicated in APC/cyclosome regulation; involved in cell separation during budding	1.257	1478	No
GSP1	YLR293C	Ran GTPase, GTP binding protein (mammalian Ranp homolog) involved in the maintenance of nuclear organization, RNA processing and transport; regulated by Srm1p, Rna1p, Yrb1p, Yrb2p, Yrp4p, Yrb30p, Cse1p and Kap95p; yeast Gsp2p homolog	1.25676	1479	Yes
MDM35	YKL053C-A	Mitochondrial intermembrane space cysteine motif protein; mutation affects mitochondrial distribution and morphology	1.256	1480	No
SIT4	YDL047W	Type 2A-related serine-threonine phosphatase that functions in the G1/S transition of the mitotic cycle; cytoplasmic and nuclear protein that modulates functions mediated by Pkc1p including cell wall and actin cytoskeleton organization	1.256	1481	No
REE1	YJL217W	Cytoplasmic protein involved in the regulation of enolase (ENO1); mRNA expression is induced by calcium shortage, copper deficiency (via Mac1p) and the presence of galactose (via Gal4p); mRNA expression is also regulated by the cell cycle	1.25567	1482	No
GCN3	YKR026C	Alpha subunit of the translation initiation factor eIF2B, the guanine-nucleotide exchange factor for eIF2; activity subsequently regulated by phosphorylated eIF2; first identified as a positive regulator of GCN4 expression	1.25567	1483	No
SWC4	YGR002C	Component of the Swr1p complex that incorporates Htz1p into chromatin; component of the NuA4 histone acetyltransferase complex	1.25567	1484	No
CHS2	YBR038W	Chitin synthase II, requires activation from zymogenic form in order to catalyze the transfer of N-acetylglucosamine (GlcNAc) to chitin; required for the synthesis of chitin in the primary septum during cytokinesis	1.25567	1485	No
CYC3	YAL039C	Cytochrome c heme lyase (holocytochrome c synthase), attaches heme to apo-cytochrome c (Cyc1p or Cyc7p) in the mitochondrial intermembrane space; human ortholog may have a role in microphthalmia with linear skin defects (MLS)	1.25567	1486	No
YGL176C	YGL176C	Putative protein of unknown function; deletion mutant is viable and has no detectable phenotype	1.25567	1487	No
CWC24	YLR323C	Essential protein, component of a complex containing Cef1p; has similarity to S. pombe Cwf24p	1.25567	1488	No
FRA2	YGL220W	Protein involved in negative regulation of transcription of iron regulon; forms an iron independent complex with Fra2p, Grx3p, and Grx4p; null mutant fails to repress iron regulon and is sensitive to nickel	1.25567	1489	No
SPG1	YGR236C	Protein required for survival at high temperature during stationary phase; not required for growth on nonfermentable carbon sources; the authentic, non-tagged protein is detected in highly purified mitochondria in high-throughput studies	1.25567	1490	No
IRC11	YOR013W	Dubious opening reading frame unlikely to encode a protein, based on available experimental and comparative sequence data; partially overlaps the uncharacterized gene YOR012C; null mutant displays increased levels of spontaneous Rad52 foci	1.25567	1491	No
YOR343C-A	YOR343C-A	Dubious open reading frame unlikely to encode a functional protein, based on available experimental and comparative sequence data	1.255	1492	No
GAL7	YBR018C	Galactose-1-phosphate uridyl transferase, synthesizes glucose-1-phosphate and UDP-galactose from UDP-D-glucose and alpha-D-galactose-1-phosphate in the second step of galactose catabolism	1.25467	1493	No
YGR203W	YGR203W	Phosphatase with sequence similarity to Acr2p and Cdc25p; member of the single-domain rhodanese homology superfamily; green fluorescent protein (GFP)-fusion protein localizes to both the cytoplasm and the nucleus	1.25467	1494	No
SOP4	YJL192C	ER-membrane protein; suppressor of pma1-7, deletion of SOP4 slows down the export of wild-type Pma1p and Pma1-7 from the ER	1.25467	1495	No
YJR018W	YJR018W	Dubious open reading frame unlikely to encode a functional protein, based on available experimental and comparative sequence data	1.25467	1496	No
ULI1	YFR026C	Putative protein of unknown function involved in and induced by the endoplasmic reticulum unfolded protein response	1.25367	1497	No
TAF5	YBR198C	Subunit (90 kDa) of TFIID and SAGA complexes, involved in RNA polymerase II transcription initiation and in chromatin modification	1.25367	1498	No
TDH2	YJR009C	Glyceraldehyde-3-phosphate dehydrogenase, isozyme 2, involved in glycolysis and gluconeogenesis; tetramer that catalyzes the reaction of glyceraldehyde-3-phosphate to 1,3 bis-phosphoglycerate; detected in the cytoplasm and cell-wall	1.25333	1499	No
SSN8	YNL025C	Cyclin-like component of the RNA polymerase II holoenzyme, involved in phosphorylation of the RNA polymerase II C-terminal domain; involved in glucose repression and telomere maintenance	1.25333	1500	No
CDC27	YBL084C	Subunit of the Anaphase-Promoting Complex/Cyclosome (APC/C), which is a ubiquitin-protein ligase required for degradation of anaphase inhibitors, including mitotic cyclins, during the metaphase/anaphase transition	1.25333	1501	No
RRS1	YOR294W	Essential protein that binds ribosomal protein L11 and is required for nuclear export of the 60S pre-ribosomal subunit during ribosome biogenesis; mouse homolog shows altered expression in Huntington's disease model mice	1.25333	1502	No
MSK1	YNL073W	Mitochondrial lysine-tRNA synthetase, required for import of both aminoacylated and deacylated forms of tRNA(Lys) into mitochondria and for aminoacylation of mitochondrially encoded tRNA(Lys)	1.25321	1503	Yes
PES4	YFR024C	Poly(A) binding protein, suppressor of DNA polymerase epsilon mutation, similar to Mip6p	1.253	1504	Yes
SEN54	YPL083C	Subunit of the tRNA splicing endonuclease, which is composed of Sen2p, Sen15p, Sen34p, and Sen54p	1.253	1505	Yes
YJR116W	YJR116W	Putative protein of unknown function	1.253	1506	No
CKS1	YBR135W	Cyclin-dependent protein kinase regulatory subunit and adaptor; modulates proteolysis of M-phase targets through interactions with the proteasome; role in transcriptional regulation, recruiting proteasomal subunits to target gene promoters	1.253	1507	No
YIF1	YNL263C	Integral membrane protein required for the fusion of ER-derived COPII transport vesicles with the Golgi; interacts with Yip1p and Yos1p; localizes to the Golgi, the ER, and COPII vesicles	1.253	1508	No
OXR1	YPL196W	Protein of unknown function required for normal levels of resistance to oxidative damage, null mutants are sensitive to hydrogen peroxide; member of a conserved family of proteins found in eukaryotes but not in prokaryotes	1.253	1509	No
VPS38	YLR360W	Part of a Vps34p phosphatidylinositol 3-kinase complex that functions in carboxypeptidase Y (CPY) sorting; binds Vps30p and Vps34p to promote production of phosphatidylinositol 3-phosphate (PtdIns3P) which stimulates kinase activity	1.253	1510	No
YKL033W-A	YKL033W-A	Putative protein of unknown function; similar to uncharacterized proteins from other fungi	1.253	1511	No
RSM22	YKL155C	Mitochondrial ribosomal protein of the small subunit; also predicted to be an S-adenosylmethionine-dependent methyltransferase	1.25267	1512	No
ALK1	YGL021W	Protein kinase; accumulation and phosphorylation are periodic during the cell cycle; phosphorylated in response to DNA damage; contains characteristic motifs for degradation via the APC pathway; similar to Alk2p and to mammalian haspins	1.25267	1513	No
TAL1	YLR354C	Transaldolase, enzyme in the non-oxidative pentose phosphate pathway; converts sedoheptulose 7-phosphate and glyceraldehyde 3-phosphate to erythrose 4-phosphate and fructose 6-phosphate	1.25267	1514	No
RNR2	YJL026W	Ribonucleotide-diphosphate reductase (RNR), small subunit; the RNR complex catalyzes the rate-limiting step in dNTP synthesis and is regulated by DNA replication and DNA damage checkpoint pathways via localization of the small subunits	1.25267	1515	No
YDR094W	YDR094W	Dubious open reading frame unlikely to encode a protein, based on available experimental and comparative sequence data; partially overlaps verified ORF DNF2	1.25267	1516	No
PTR3	YFR029W	Component of the SPS plasma membrane amino acid sensor system (Ssy1p-Ptr3p-Ssy5p), which senses external amino acid concentration and transmits intracellular signals that result in regulation of expression of amino acid permease genes	1.25233	1517	No
FIP1	YJR093C	Subunit of cleavage polyadenylation factor (CPF), interacts directly with poly(A) polymerase (Pap1p) to regulate its activity	1.25233	1518	Yes
YLL059C	YLL059C	Dubious open reading frame unlikely to encode a protein, based on available experimental and comparative sequence data	1.25233	1519	No
YAK1	YJL141C	Serine-threonine protein kinase that is part of a glucose-sensing system involved in growth control in response to glucose availability; translocates from the cytoplasm to the nucleus and phosphorylates Pop2p in response to a glucose signal	1.25167	1520	No
FMP10	YER182W	Putative protein of unknown function; the authentic, non-tagged protein is detected in highly purified mitochondria in high-throughput studies	1.25133	1521	No
CLN3	YAL040C	G1 cyclin involved in cell cycle progression; activates Cdc28p kinase to promote the G1 to S phase transition; plays a role in regulating transcription of the other G1 cyclins, CLN1 and CLN2; regulated by phosphorylation and proteolysis	1.25133	1522	No
ERB1	YMR049C	Constituent of 66S pre-ribosomal particles, forms a complex with Nop7p and Ytm1p that is required for maturation of the large ribosomal subunit; required for maturation of the 25S and 5.8S ribosomal RNAs; homologous to mammalian Bop1	1.251	1523	Yes
JIP3	YLR331C	Dubious open reading frame, unlikely to encode a protein; not conserved in closely related Saccharomyces species; 98% of ORF overlaps the verified gene MID2	1.25067	1524	No
SOH1	YGL127C	Subunit of the RNA polymerase II mediator complex; associates with core polymerase subunits to form the RNA polymerase II holoenzyme; involved in telomere maintenance; conserved with other metazoan MED31 subunits	1.25067	1525	No
ALG13	YGL047W	Catalytic component of UDP-GlcNAc transferase, required for the second step of dolichyl-linked oligosaccharide synthesis; anchored to the ER membrane via interaction with Alg14p; similar to bacterial and human glycosyltransferases	1.25067	1526	No
MRP17	YKL003C	Mitochondrial ribosomal protein of the small subunit; MRP17 exhibits genetic interactions with PET122, encoding a COX3-specific translational activator	1.25	1527	Yes
PRP21	YJL203W	Subunit of the SF3a splicing factor complex, required for spliceosome assembly	1.25	1528	Yes
OPI10	YOL032W	Protein with a possible role in phospholipid biosynthesis, based on inositol-excreting phenotype of the null mutant and its suppression by exogenous choline	1.25	1529	No
TSC13	YDL015C	Enoyl reductase that catalyzes the last step in each cycle of very long chain fatty acid elongation, localizes to the ER, highly enriched in a structure marking nuclear-vacuolar junctions, coimmunoprecipitates with elongases Fen1p and Sur4p	1.25	1530	No
FEN2	YCR028C	Plasma membrane H+-pantothenate symporter; confers sensitivity to the antifungal agent fenpropimorph	1.25	1531	No
YHR212W-A	YHR212W-A	Putative protein of unknown function; identified by gene-trapping, microarray-based expression analysis, and genome-wide homology searching	1.25	1532	No
NPL4	YBR170C	Endoplasmic reticulum and nuclear membrane protein, forms a complex with Cdc48p and Ufd1p that recognizes ubiquitinated proteins in the endoplasmic reticulum and delivers them to the proteasome for degradation	1.25	1533	No
ERP4	YOR016C	Protein with similarity to Emp24p and Erv25p, member of the p24 family involved in ER to Golgi transport	1.25	1534	No
YGR293C	YGR293C	Dubious open reading frame unlikely to encode a protein, based on available experimental and comparative sequence data; partially overlaps the uncharacterized ORF YGR294W	1.24967	1535	No
MSP1	YGR028W	Mitochondrial protein involved in sorting of proteins in the mitochondria; putative membrane-spanning ATPase	1.24933	1536	No
ARO9	YHR137W	Aromatic aminotransferase II, catalyzes the first step of tryptophan, phenylalanine, and tyrosine catabolism	1.24933	1537	No
FRE6	YLL051C	Putative ferric reductase with similarity to Fre2p; expression induced by low iron levels	1.24933	1538	No
GLT1	YDL171C	NAD(+)-dependent glutamate synthase (GOGAT), synthesizes glutamate from glutamine and alpha-ketoglutarate; with Gln1p, forms the secondary pathway for glutamate biosynthesis from ammonia; expression regulated by nitrogen source	1.24933	1539	No
YPL109C	YPL109C	Putative protein of unknown function; the authentic, non-tagged protein is detected in highly purified mitochondria in high-throughput studies	1.24933	1540	No
SSL2	YIL143C	Component of the holoenzyme form of RNA polymerase transcription factor TFIIH, has DNA-dependent ATPase/helicase activity and is required, with Rad3p, for unwinding promoter DNA; involved in DNA repair; homolog of human ERCC3	1.249	1541	No
ASG7	YJL170C	Protein that regulates signaling from a G protein beta subunit Ste4p and its relocalization within the cell; specific to a-cells and induced by alpha-factor	1.249	1542	No
YNL010W	YNL010W	Putative protein of unknown function with similarity to phosphoserine phosphatases; green fluorescent protein (GFP)-fusion protein localizes to the cytoplasm and nucleus; homozygous diploid mutant shows an increase in glycogen accumulation	1.249	1543	No
YGL039W	YGL039W	Oxidoreductase shown to reduce carbonyl compounds to chiral alcohols	1.24867	1544	No
ESBP6	YNL125C	Protein with similarity to monocarboxylate permeases, appears not to be involved in transport of monocarboxylates such as lactate, pyruvate or acetate across the plasma membrane	1.248	1545	No
HAM1	YJR069C	Conserved protein with deoxyribonucleoside triphosphate pyrophosphohydrolase activity, mediates exclusion of noncanonical purines from deoxyribonucleoside triphosphate pools; mutant is sensitive to the base analog 6-N-hydroxylaminopurine	1.24767	1546	No
YKL031W	YKL031W	Dubious open reading frame, unlikely to encode a protein; not conserved in closely related Saccharomyces species	1.24733	1547	No
RPC34	YNR003C	RNA polymerase III subunit C34; interacts with TFIIIB70 and is a key determinant in pol III recruitment by the preinitiation complex	1.24733	1548	No
YGL052W	YGL052W	Dubious open reading frame unlikely to encode a protein, based on available experimental and comparative sequence data; partially overlaps the verified ORF MST27	1.24733	1549	No
YNL092W	YNL092W	Putative S-adenosylmethionine-dependent methyltransferase of the seven beta-strand family; YNL092W is not an essential gene	1.24733	1550	No
OCA5	YHL029C	Cytoplasmic protein required for replication of Brome mosaic virus in S. cerevisiae, which is a model system for studying replication of positive-strand RNA viruses in their natural hosts	1.247	1551	No
BYE1	YKL005C	Negative regulator of transcription elongation, contains a TFIIS-like domain and a PHD finger, multicopy suppressor of temperature-sensitive ess1 mutations, probably binds RNA polymerase II large subunit	1.247	1552	No
YAP1801	YHR161C	Protein involved in clathrin cage assembly; binds Pan1p and clathrin; homologous to Yap1802p, member of the AP180 protein family	1.24667	1553	No
DNF3	YMR162C	Aminophospholipid translocase (flippase) that maintains membrane lipid asymmetry in post-Golgi secretory vesicles; localizes to the trans-Golgi network; likely involved in protein transport; type 4 P-type ATPase	1.24667	1554	No
CHS1	YNL192W	Chitin synthase I, requires activation from zymogenic form in order to catalyze the transfer of N-acetylglucosamine (GlcNAc) to chitin; required for repairing the chitin septum during cytokinesis; transcription activated by mating factor	1.24633	1555	No
ARC35	YNR035C	Subunit of the ARP2/3 complex, which is required for the motility and integrity of cortical actin patches; required for cortical localization of calmodulin	1.24633	1556	No
PUP1	YOR157C	Beta 2 subunit of the 20S proteasome; endopeptidase with trypsin-like activity that cleaves after basic residues; synthesized as a proprotein before being proteolytically processed for assembly into 20S particle; human homolog is subunit Z	1.24633	1557	No
MDM36	YPR083W	Protein required for normal mitochondrial morphology and inheritance	1.24633	1558	No
SPO73	YER046W	Meiosis-specific protein of unknown function, required for spore wall formation during sporulation; dispensible for both nuclear divisions during meiosis	1.24633	1559	No
PEX27	YOR193W	Peripheral peroxisomal membrane protein involved in controlling peroxisome size and number, interacts with homologous protein Pex25p	1.246	1560	No
FUN12	YAL035W	GTPase, required for general translation initiation by promoting Met-tRNAiMet binding to ribosomes and ribosomal subunit joining; homolog of bacterial IF2	1.24567	1561	No
FRT2	YAL028W	Tail-anchored endoplasmic reticulum membrane protein, interacts with homolog Frt1p but is not a substrate of calcineurin (unlike Frt1p), promotes growth in conditions of high Na+, alkaline pH, or cell wall stress; potential Cdc28p substrate	1.24567	1562	No
YGL118C	YGL118C	Dubious open reading frame unlikely to encode a functional protein, based on available experimental and comparative sequence data	1.24567	1563	No
ARF3	YOR094W	Glucose-repressible ADP-ribosylation factor, GTPase of the Ras superfamily involved in development of polarity	1.24567	1564	No
YOR342C	YOR342C	Putative protein of unknown function; green fluorescent protein (GFP)-fusion protein localizes to the cytoplasm and the nucleus	1.24567	1565	No
HAT2	YEL056W	Subunit of the Hat1p-Hat2p histone acetyltransferase complex; required for high affinity binding of the complex to free histone H4, thereby enhancing Hat1p activity; similar to human RbAp46 and 48; has a role in telomeric silencing	1.24567	1566	No
MTC2	YKL098W	Protein of unknown function; mtc2 is synthetically sick with cdc13-1	1.24533	1567	No
HXT11	YOL156W	Putative hexose transporter that is nearly identical to Hxt9p, has similarity to major facilitator superfamily (MFS) transporters and is involved in pleiotropic drug resistance	1.244	1568	No
SOD1	YJR104C	Cytosolic copper-zinc superoxide dismutase; some mutations are analogous to those that cause ALS (amyotrophic lateral sclerosis) in humans	1.244	1569	No
YJR056C	YJR056C	Putative protein of unknown function; green fluorescent protein (GFP)-fusion protein localizes to both the cytoplasm and the nucleus	1.244	1570	No
PLP2	YOR281C	Essential protein that interacts with the CCT (chaperonin containing TCP-1) complex to stimulate actin folding; has similarity to phosducins; null mutant lethality is complemented by mouse phosducin-like protein MgcPhLP	1.24367	1571	No
SDH2	YLL041C	Iron-sulfur protein subunit of succinate dehydrogenase (Sdh1p, Sdh2p, Sdh3p, Sdh4p), which couples the oxidation of succinate to the transfer of electrons to ubiquinone	1.24367	1572	No
YLR111W	YLR111W	Dubious open reading frame unlikely to encode a protein, based on available experimental and comparative sequence data	1.24367	1573	No
AIM17	YHL021C	Putative protein of unknown function; the authentic, non-tagged protein is detected in highly purified mitochondria in high-throughput studies; null mutant displays reduced frequency of mitochondrial genome loss	1.24367	1574	No
GOS1	YHL031C	v-SNARE protein involved in Golgi transport, homolog of the mammalian protein GOS-28/GS28	1.24367	1575	No
TIM13	YGR181W	Mitochondrial intermembrane space protein, forms a complex with Tim8p that mediates import and insertion of a subset of polytopic inner membrane proteins; may prevent aggregation of incoming proteins in a chaperone-like manner	1.24367	1576	No
RPL33B	YOR234C	Ribosomal protein L37 of the large (60S) ribosomal subunit, nearly identical to Rpl33Ap and has similarity to rat L35a; rpl33b null mutant exhibits normal growth while rpl33a rpl33b double null mutant is inviable	1.24367	1577	Yes
KIP1	YBL063W	Kinesin-related motor protein required for mitotic spindle assembly, chromosome segregation, and 2 micron plasmid partitioning; functionally redundant with Cin8p for chromosomal but not plasmid functions	1.24367	1578	No
YMR082C	YMR082C	Dubious open reading frame unlikely to encode a functional protein, based on available experimental and comparative sequence data	1.24367	1579	No
MRPS35	YGR165W	Mitochondrial ribosomal protein of the small subunit	1.2435	1580	No
TFB3	YDR460W	Subunit of TFIIH and nucleotide excision repair factor 3 complexes, involved in transcription initiation, required for nucleotide excision repair; ring finger protein similar to mammalian CAK and TFIIH subunit	1.24333	1581	No
FMP41	YNL168C	Putative protein of unknown function; GFP-fusion protein is induced in response to the DNA-damaging agent MMS; the authentic, non-tagged protein is detected in highly purified mitochondria in high-throughput studies	1.24333	1582	No
RPL37A	YLR185W	Protein component of the large (60S) ribosomal subunit, has similarity to Rpl37Bp and to rat L37 ribosomal protein	1.24324	1583	Yes
MRP8	YKL142W	Protein of unknown function; undergoes sumoylation; transcription induced under cell wall stress; protein levels are reduced under anaerobic conditions; originally thought to be a mitochondrial ribosomal protein based on sequence analysis	1.24324	1584	Yes
YLR358C	YLR358C	Dubious open reading frame unlikely to encode a protein, based on available experimental and comparative sequence data; partially overlaps the verified ORF RSC2/YLR357W	1.243	1585	No
YGR111W	YGR111W	Putative protein of unknown function; green fluorescent protein (GFP)-fusion protein localizes to both the cytoplasm and the nucleus	1.243	1586	No
LEU4	YNL104C	Alpha-isopropylmalate synthase (2-isopropylmalate synthase); the main isozyme responsible for the first step in the leucine biosynthesis pathway	1.243	1587	No
YPL238C	YPL238C	Dubious open reading frame unlikely to encode a functional protein, based on available experimental and comparative sequence data; partially overlaps 5' end of the verified essential gene SUI3/YPL237W	1.243	1588	No
YAL018C	YAL018C	Putative protein of unknown function	1.24267	1589	No
PEX21	YGR239C	Peroxin required for targeting of peroxisomal matrix proteins containing PTS2; interacts with Pex7p; partially redundant with Pex18p	1.24233	1590	No
ERG28	YER044C	Endoplasmic reticulum membrane protein, may facilitate protein-protein interactions between the Erg26p dehydrogenase and the Erg27p 3-ketoreductase and/or tether these enzymes to the ER, also interacts with Erg6p	1.24233	1591	No
HTB2	YBL002W	Histone H2B, core histone protein required for chromatin assembly and chromosome function; nearly identical to HTB1; Rad6p-Bre1p-Lge1p mediated ubiquitination regulates transcriptional activation, meiotic DSB formation and H3 methylation	1.242	1592	No
YPK1	YKL126W	Serine/threonine protein kinase required for receptor-mediated endocytosis; involved in sphingolipid-mediated and cell integrity signaling pathways; localized to the bud neck, cytosol and plasma membrane; homolog of mammalian kinase SGK	1.242	1593	No
MMR1	YLR190W	Phosphorylated protein of the mitochondrial outer membrane, localizes only to mitochondria of the bud; interacts with Myo2p to mediate mitochondrial distribution to buds; mRNA is targeted to the bud via the transport system involving She2p	1.242	1594	No
CBP3	YPL215W	Mitochondrial protein required for assembly of ubiquinol cytochrome-c reductase complex (cytochrome bc1 complex); interacts with Cbp4p and function is partially redundant with that of Cbp4p	1.242	1595	No
VPS69	YPR087W	Dubious open reading frame, unlikely to encode a protein; not conserved in closely related Saccharomyces species; 85% of ORF overlaps the verified gene SRP54; deletion causes a vacuolar protein sorting defect	1.242	1596	No
ATX1	YNL259C	Cytosolic copper metallochaperone that transports copper to the secretory vesicle copper transporter Ccc2p for eventual insertion into Fet3p, which is a multicopper oxidase required for high-affinity iron uptake	1.24167	1597	No
YLR339C	YLR339C	Dubious open reading frame unlikely to encode a protein, based on available experimental and comparative sequence data; partially overlaps the essential gene RPP0	1.24167	1598	No
GCV3	YAL044C	H subunit of the mitochondrial glycine decarboxylase complex, required for the catabolism of glycine to 5,10-methylene-THF; also required for all protein lipoylation; expression is regulated by levels of 5,10-methylene-THF	1.24133	1599	No
ATP7	YKL016C	Subunit d of the stator stalk of mitochondrial F1F0 ATP synthase, which is a large, evolutionarily conserved enzyme complex required for ATP synthesis	1.24133	1600	No
RTA1	YGR213C	Protein involved in 7-aminocholesterol resistance; has seven potential membrane-spanning regions; expression is induced under both low-heme and low-oxygen conditions; member of the fungal lipid-translocating exporter (LTE) family of protein	1.24067	1601	No
VPS27	YNR006W	Endosomal protein that forms a complex with Hse1p; required for recycling Golgi proteins, forming lumenal membranes and sorting ubiquitinated proteins destined for degradation; has Ubiquitin Interaction Motifs which bind ubiquitin (Ubi4p)	1.24067	1602	No
RPT3	YDR394W	One of six ATPases of the 19S regulatory particle of the 26S proteasome involved in the degradation of ubiquitinated substrates; substrate of N-acetyltransferase B	1.2405	1603	No
TCB1	YOR086C	Lipid-binding protein containing three calcium and lipid binding domains; non-tagged protein localizes to mitochondria and GFP-fusion protein localizes to the cell periphery; C-termini of Tcb1p, Tcb2p and Tcb3p interact	1.24033	1604	No
RRP9	YPR137W	Protein involved in pre-rRNA processing, associated with U3 snRNP; component of small ribosomal subunit (SSU) processosome; ortholog of the human U3-55k protein	1.23984	1605	Yes
SPG4	YMR107W	Protein required for survival at high temperature during stationary phase; not required for growth on nonfermentable carbon sources	1.23967	1606	No
TIM22	YDL217C	Component of the mitochondrial Tim54p-Tim22p complex involved in insertion of polytopic proteins into the inner membrane	1.23933	1607	No
ORC2	YBR060C	Subunit of the origin recognition complex, which directs DNA replication by binding to replication origins and is also involved in transcriptional silencing; interacts with Spp1p and with trimethylated histone H3; phosphorylated by Cdc28p	1.23933	1608	No
YKL133C	YKL133C	Putative protein of unknown function; has similarity to Mgr3p, but unlike MGR3, is not required for growth of cells lacking the mitochondrial genome (null mutation does not confer a petite-negative phenotype)	1.23933	1609	No
GLG2	YJL137C	Self-glucosylating initiator of glycogen synthesis, also glucosylates n-dodecyl-beta-D-maltoside; similar to mammalian glycogenin	1.23933	1610	No
SSP1	YHR184W	Protein involved in the control of meiotic nuclear division and coordination of meiosis with spore formation; transcription is induced midway through meiosis	1.23833	1611	No
DGA1	YOR245C	Diacylglycerol acyltransferase, catalyzes the terminal step of triacylglycerol (TAG) formation, acylates diacylglycerol using acyl-CoA as an acyl donor, localized to lipid particles	1.23833	1612	No
ECM25	YJL201W	Non-essential protein of unknown function; promoter contains a consensus binding sequence for factor Abf1p	1.23833	1613	No
PTM1	YKL039W	Protein of unknown function, copurifies with late Golgi vesicles containing the v-SNARE Tlg2p	1.23733	1614	No
POL31	YJR006W	DNA polymerase III (delta) subunit, essential for cell viability; involved in DNA replication and DNA repair	1.23733	1615	No
YLR312C	YLR312C	Putative protein of unknown function	1.23733	1616	No
APA1	YCL050C	Diadenosine 5',5''-P1,P4-tetraphosphate phosphorylase I (AP4A phosphorylase), involved in catabolism of bis(5'-nucleosidyl) tetraphosphates; has similarity to Apa2p	1.23733	1617	No
MST28	YAR033W	Putative integral membrane protein, involved in vesicle formation; forms complex with Mst27p; member of DUP240 gene family; binds COPI and COPII vesicles	1.23733	1618	No
YMR130W	YMR130W	Putative protein of unknown function; YMR130W is not an essential gene	1.23733	1619	No
DOG2	YHR043C	2-deoxyglucose-6-phosphate phosphatase, member of a family of low molecular weight phosphatases, similar to Dog1p, induced by oxidative and osmotic stress, confers 2-deoxyglucose resistance when overexpressed	1.23733	1620	No
YNK1	YKL067W	Nucleoside diphosphate kinase, catalyzes the transfer of gamma phosphates from nucleoside triphosphates, usually ATP, to nucleoside diphosphates by a mechanism that involves formation of an autophosphorylated enzyme intermediate	1.23733	1621	No
YPR077C	YPR077C	Dubious open reading frame unlikely to encode a functional protein, based on available experimental and comparative sequence data; expression increased by deletion of NAP1	1.23733	1622	No
ARO7	YPR060C	Chorismate mutase, catalyzes the conversion of chorismate to prephenate to initiate the tyrosine/phenylalanine-specific branch of aromatic amino acid biosynthesis	1.23733	1623	No
PAM1	YDR251W	Essential protein of unknown function; exhibits variable expression during colony morphogenesis; overexpression permits survival without protein phosphatase 2A, inhibits growth, and induces a filamentous phenotype	1.23733	1624	No
UGP1	YKL035W	UDP-glucose pyrophosphorylase (UGPase), catalyses the reversible formation of UDP-Glc from glucose 1-phosphate and UTP, involved in a wide variety of metabolic pathways, expression modulated by Pho85p through Pho4p	1.23733	1625	No
YLR218C	YLR218C	Putative protein of unknown function; green fluorescent protein (GFP)-fusion protein localizes to the cytoplasm; YLR218C is not essential; mutants exhibit glycogen storage defects and growth defects on a non-fermentable carbon source	1.23733	1626	No
YOR302W	YOR302W	CPA1 uORF , Arginine attenuator peptide, regulates translation of the CPA1 mRNA	1.237	1627	No
YDL094C	YDL094C	Dubious open reading frame unlikely to encode a protein, based on available experimental and comparative sequence data; partially overlaps verfied gene PMT5/YDL093W; YDL094C is not essential	1.237	1628	No
ALR2	YFL050C	Probable Mg(2+) transporter; overexpression confers increased tolerance to Al(3+) and Ga(3+) ions; plays a role in regulating Ty1 transposition	1.23667	1629	No
YBR204C	YBR204C	Serine hydrolase; YBR204C is not an essential gene	1.2365	1630	No
SDP1	YIL113W	Stress-inducible dual-specificity MAP kinase phosphatase, negatively regulates Slt2p MAP kinase by direct dephosphorylation, diffuse localization under normal conditions shifts to punctate localization after heat shock	1.23633	1631	No
SAP30	YMR263W	Subunit of a histone deacetylase complex, along with Rpd3p and Sin3p, that is involved in silencing at telomeres, rDNA, and silent mating-type loci; involved in telomere maintenance	1.236	1632	No
YGL159W	YGL159W	Putative protein of unknown function; deletion mutant has no detectable phenotype	1.236	1633	No
IMP2	YMR035W	Catalytic subunit of the mitochondrial inner membrane peptidase complex, required for maturation of mitochondrial proteins of the intermembrane space; complex contains Imp1p and Imp2p (both catalytic subunits), and Som1p	1.23567	1634	No
COX5B	YIL111W	Subunit Vb of cytochrome c oxidase, which is the terminal member of the mitochondrial inner membrane electron transport chain; predominantly expressed during anaerobic growth while its isoform Va (Cox5Ap) is expressed during aerobic growth	1.23567	1635	No
RIO2	YNL207W	Essential serine kinase involved in the processing of the 20S pre-rRNA into mature 18S rRNA; has similarity to Rio1p	1.23506	1636	Yes
YGR027W-A	YGR027W-A	Retrotransposon TYA Gag gene co-transcribed with TYB Pol; translated as TYA or TYA-TYB polyprotein; Gag is a nucleocapsid protein that is the structural constituent of virus-like particles (VLPs); similar to retroviral Gag	1.235	1637	No
ALT1	YLR089C	Alanine transaminase (glutamic pyruvic transaminase); involved in alanine biosynthetic and catabolic processes; the authentic, non-tagged protein is detected in highly purified mitochondria in high-throughput studies	1.23467	1638	No
IRC10	YOL015W	Putative protein of unknown function; null mutant displays increased levels of spontaneous Rad52p foci	1.23467	1639	No
URA10	YMR271C	Minor orotate phosphoribosyltransferase (OPRTase) isozyme that catalyzes the fifth enzymatic step in the de novo biosynthesis of pyrimidines, converting orotate into orotidine-5'-phosphate; major OPRTase encoded by URA5	1.23467	1640	No
YKL131W	YKL131W	Dubious ORF unlikely to encode a functional protein, based on available experimental and comparative sequence data	1.23367	1641	No
YLR311C	YLR311C	Dubious open reading frame unlikely to encode a protein, based on available experimental and comparative sequence data	1.23367	1642	No
RIM2	YBR192W	Mitochondrial pyrimidine nucleotide transporter; imports pyrimidine nucleoside triphosphates and exports pyrimidine nucleoside monophosphates; member of the mitochondrial carrier family	1.23367	1643	No
YPL034W	YPL034W	Putative protein of unknown function; YPL034W is not essential gene	1.23367	1644	No
ACS1	YAL054C	Acetyl-coA synthetase isoform which, along with Acs2p, is the nuclear source of acetyl-coA for histone acetlyation; expressed during growth on nonfermentable carbon sources and under aerobic conditions	1.23333	1645	No
YHR033W	YHR033W	Putative protein of unknown function; epitope-tagged protein localizes to the cytoplasm	1.23333	1646	Yes
YJL009W	YJL009W	Dubious open reading frame unlikely to encode a protein, based on available experimental and comparative sequence data; partially overlaps CCT8/YJL008C, a verified gene encoding a subunit of the cytosolic chaperonin Cct ring complex	1.23333	1647	No
TOM20	YGR082W	Component of the TOM (translocase of outer membrane) complex responsible for recognition and initial import steps for all mitochondrially directed proteins; acts as a receptor for incoming precursor proteins	1.23333	1648	No
RVB2	YPL235W	Essential protein involved in transcription regulation; component of chromatin remodeling complexes; required for assembly and function of the INO80 complex; also referred to as reptin; member of the RUVB-like protein family	1.23333	1649	No
YGL108C	YGL108C	Protein of unknown function, predicted to be palmitoylated; green fluorescent protein (GFP)-fusion protein localizes to the cell periphery	1.23333	1650	No
YMC1	YPR058W	Mitochondrial protein, putative inner membrane transporter with a role in oleate metabolism and glutamate biosynthesis; member of the mitochondrial carrier (MCF) family; has similarity with Ymc2p	1.23333	1651	No
MCM5	YLR274W	Component of the hexameric MCM complex, which is important for priming origins of DNA replication in G1 and becomes an active ATP-dependent helicase that promotes DNA melting and elongation when activated by Cdc7p-Dbf4p in S-phase	1.23333	1652	No
TUF1	YOR187W	Mitochondrial translation elongation factor Tu; comprises both GTPase and guanine nucleotide exchange factor activities, while these activities are found in separate proteins in S. pombe and humans	1.23333	1653	No
ROT2	YBR229C	Glucosidase II catalytic subunit required for normal cell wall synthesis; mutations in rot2 suppress tor2 mutations, and are synthetically lethal with rot1 mutations	1.23333	1654	No
CGR1	YGL029W	Protein involved in nucleolar integrity and processing of the pre-rRNA for the 60S ribosome subunit; transcript is induced in response to cytotoxic stress but not genotoxic stress	1.23333	1655	No
IRC8	YJL051W	Bud tip localized protein of unknown function; mRNA is targeted to the bud by a She2p dependent transport system; mRNA is cell cycle regulated via Fkh2p, peaking in G2/M phase; null mutant displays increased levels of spontaneous Rad52p foc	1.23333	1656	No
YMR074C	YMR074C	Protein with homology to human PDCD5, which is involved in programmed cell death; N-terminal region forms a conserved triple-helix bundle structure; overexpression promotes H2O2-induced apoptosis; YMR074C is not an essential gene	1.23333	1657	No
SCS7	YMR272C	Sphingolipid alpha-hydroxylase, functions in the alpha-hydroxylation of sphingolipid-associated very long chain fatty acids, has both cytochrome b5-like and hydroxylase/desaturase domains, not essential for growth	1.233	1658	No
MDJ1	YFL016C	Co-chaperone that stimulates the ATPase activity of the HSP70 protein Ssc1p; involved in protein folding/refolding in the mitochodrial matrix; required for proteolysis of misfolded proteins; member of the HSP40 (DnaJ) family of chaperones	1.233	1659	No
IDP3	YNL009W	Peroxisomal NADP-dependent isocitrate dehydrogenase, catalyzes oxidation of isocitrate to alpha-ketoglutarate with the formation of NADP(H+), required for growth on unsaturated fatty acids	1.23267	1660	No
FPK1	YNR047W	Protein kinase proposed to regulate the putative phospholipid translocases Lem3p-Dnf1p/Dnf2p; overexpression interferes with pheromone-induced growth arrest; localizes to the cytoplasm, early endosome/TGN compartments, and plasma membrane	1.23267	1661	No
YJL152W	YJL152W	Dubious ORF unlikely to encode a functional protein, based on available experimental and comparative sequence data	1.23267	1662	No
PHB1	YGR132C	Subunit of the prohibitin complex (Phb1p-Phb2p), a 1.2 MDa ring-shaped inner mitochondrial membrane chaperone that stabilizes newly synthesized proteins; determinant of replicative life span; involved in mitochondrial segregation	1.23233	1663	No
YRA1	YDR381W	Nuclear protein that binds to RNA and to Mex67p, required for export of poly(A)+ mRNA from the nucleus; member of the REF (RNA and export factor binding proteins) family; another family member, Yra2p, can substitute for Yra1p function	1.23233	1664	Yes
YER187W	YER187W	Putative protein of unknown function; induced in respiratory-deficient cells	1.232	1665	No
ELF1	YKL160W	Transcription elongation factor that contains a conserved zinc finger domain; implicated in the maintenance of proper chromatin structure in actively transcribed regions; deletion inhibits Brome mosaic virus (BMV) gene expression	1.23167	1666	No
RPC10	YHR143W-A	RNA polymerase subunit, found in RNA polymerase complexes I, II, and III	1.23167	1667	No
YML102C-A	YML102C-A	Dubious open reading frame unlikely to encode a functional protein, based on available experimental and comparative sequence data	1.23167	1668	No
SKN7	YHR206W	Nuclear response regulator and transcription factor, part of a branched two-component signaling system; required for optimal induction of heat-shock genes in response to oxidative stress; involved in osmoregulation	1.23167	1669	No
MAG1	YER142C	3-methyl-adenine DNA glycosylase involved in protecting DNA against alkylating agents; initiates base excision repair by removing damaged bases to create abasic sites that are subsequently repaired	1.23167	1670	No
MSB4	YOL112W	GTPase-activating protein of the Ras superfamily that acts primarily on Sec4p, localizes to the bud site and bud tip, has similarity to Msb3p; msb3 msb4 double mutation causes defects in secretion and actin organization	1.23167	1671	No
YGR272C	YGR272C	35S primary transcript processing	1.23167	1672	No
YJL220W	YJL220W	Dubious open reading frame unlikely to encode a protein, based on available experimental and comparative sequence data; partially overlaps the verified gene YJL221C/FSP2	1.23167	1673	No
JLP1	YLL057C	Fe(II)-dependent sulfonate/alpha-ketoglutarate dioxygenase, involved in sulfonate catabolism for use as a sulfur source; contains sequence that resembles a J domain (typified by the E. coli DnaJ protein); induced by sulphur starvation	1.23167	1674	No
YOR318C	YOR318C	Dubious open reading frame unlikely to encode a protein, based on available experimental and comparative sequence data; transcript is predicted to be spliced but there is no evidence that it is spliced in vivo	1.23167	1675	No
NPY1	YGL067W	NADH diphosphatase (pyrophosphatase), hydrolyzes the pyrophosphate linkage in NADH and related nucleotides; localizes to peroxisomes	1.23133	1676	No
YNL108C	YNL108C	Putative protein of unknown function with similarity to Tfc7p and prokaryotic phosphotransfer enzymes; null mutant shows alterations in glucose metabolism; GFP-fusion protein localizes to the cytoplasm and nucleus	1.23133	1677	No
ERG7	YHR072W	Lanosterol synthase, an essential enzyme that catalyzes the cyclization of squalene 2,3-epoxide, a step in ergosterol biosynthesis	1.231	1678	No
GPR1	YDL035C	Plasma membrane G protein coupled receptor (GPCR) that interacts with the heterotrimeric G protein alpha subunit, Gpa2p, and with Plc1p; sensor that integrates nutritional signals with the modulation of cell fate via PKA and cAMP synthesis	1.231	1679	No
RNP1	YLL046C	Ribonucleoprotein that contains two RNA recognition motifs (RRM)	1.23077	1680	Yes
EFB1	YAL003W	Translation elongation factor 1 beta; stimulates nucleotide exchange to regenerate EF-1 alpha-GTP for the next elongation cycle; part of the EF-1 complex, which facilitates binding of aminoacyl-tRNA to the ribosomal A site	1.23033	1681	No
PET10	YKR046C	Protein of unknown function that co-purifies with lipid particles; expression pattern suggests a role in respiratory growth; computational analysis of large-scale protein-protein interaction data suggests a role in ATP/ADP exchange	1.23	1682	No
FMP40	YPL222W	Putative protein of unknown function; proposed to be involved in responding to environmental stresses; the authentic, non-tagged protein is detected in highly purified mitochondria in high-throughput studies	1.22933	1683	No
LTV1	YKL143W	Component of the GSE complex, which is required for proper sorting of amino acid permease Gap1p; required for ribosomal small subunit export from nucleus; required for growth at low temperature	1.229	1684	No
OYE2	YHR179W	Widely conserved NADPH oxidoreductase containing flavin mononucleotide (FMN), homologous to Oye3p with slight differences in ligand binding and catalytic properties; may be involved in sterol metabolism	1.229	1685	No
YJL086C	YJL086C	Dubious open reading frame unlikely to encode a protein, based on available experimental and comparative sequence data; partially overlaps the verified genes YJL085W/EXO70 and YJL087C/TRL1	1.229	1686	No
PMT6	YGR199W	Protein O-mannosyltransferase, transfers mannose from dolichyl phosphate-D-mannose to protein serine/threonine residues of secretory proteins; reaction is essential for cell wall rigidity; member of a family of mannosyltransferases	1.229	1687	No
GUS1	YGL245W	Glutamyl-tRNA synthetase (GluRS), forms a complex with methionyl-tRNA synthetase (Mes1p) and Arc1p; complex formation increases the catalytic efficiency of both tRNA synthetases and ensures their correct localization to the cytoplasm	1.22853	1688	Yes
PDB1	YBR221C	E1 beta subunit of the pyruvate dehydrogenase (PDH) complex, which is an evolutionarily-conserved multi-protein complex found in mitochondria	1.228	1689	No
SSS1	YDR086C	Subunit of the Sec61p translocation complex (Sec61p-Sss1p-Sbh1p) that forms a channel for passage of secretory proteins through the endoplasmic reticulum membrane, and of the Ssh1p complex (Ssh1p-Sbh2p-Sss1p); interacts with Ost4p and Wbp1p	1.228	1690	No
ADK1	YDR226W	Adenylate kinase, required for purine metabolism; localized to the cytoplasm and the mitochondria; lacks cleavable signal sequence	1.22767	1691	No
SRL3	YKR091W	Cytoplasmic protein that, when overexpressed, suppresses the lethality of a rad53 null mutation; potential Cdc28p substrate	1.22767	1692	No
AAD3	YCR107W	Putative aryl-alcohol dehydrogenase with similarity to P. chrysosporium aryl-alcohol dehydrogenase; mutational analysis has not yet revealed a physiological role	1.227	1693	No
PSR1	YLL010C	Plasma membrane associated protein phosphatase involved in the general stress response; required along with binding partner Whi2p for full activation of STRE-mediated gene expression, possibly through dephosphorylation of Msn2p	1.227	1694	No
NUT2	YPR168W	Subunit of the RNA polymerase II mediator complex; associates with core polymerase subunits to form the RNA polymerase II holoenzyme; required for transcriptional activation and has a role in basal transcription	1.227	1695	No
YBR232C	YBR232C	Dubious open reading frame unlikely to encode a protein, based on available experimental and comparative sequence data	1.227	1696	No
YJL007C	YJL007C	Dubious open reading frame unlikely to encode a functional protein, based on available experimental and comparative sequence data	1.227	1697	No
YKT6	YKL196C	Vesicle membrane protein (v-SNARE) with acyltransferase activity; involved in trafficking to and within the Golgi, endocytic trafficking to the vacuole, and vacuolar fusion; membrane localization due to prenylation at the carboxy-terminus	1.227	1698	No
ADO1	YJR105W	Adenosine kinase, required for the utilization of S-adenosylmethionine (AdoMet); may be involved in recycling adenosine produced through the methyl cycle	1.227	1699	No
SUR7	YML052W	Plasma membrane protein that localizes to furrow-like invaginations (MCC patches); component of eisosomes; associated with endocytosis, along with Pil1p and Lsp1p; sporulation and plasma membrane sphingolipid content are altered in mutants	1.227	1700	No
YPT53	YNL093W	GTPase, similar to Ypt51p and Ypt52p and to mammalian rab5; required for vacuolar protein sorting and endocytosis	1.227	1701	No
YDC1	YPL087W	Alkaline dihydroceramidase, involved in sphingolipid metabolism; preferentially hydrolyzes dihydroceramide to a free fatty acid and dihydrosphingosine; has a minor reverse activity	1.227	1702	No
ALR1	YOL130W	Plasma membrane Mg(2+) transporter, expression and turnover are regulated by Mg(2+) concentration; overexpression confers increased tolerance to Al(3+) and Ga(3+) ions	1.227	1703	No
RAD33	YML011C	Protein involved in nucleotide excision repair; green fluorescent protein (GFP)-fusion protein localizes to the nucleus	1.227	1704	No
RSM28	YDR494W	Mitochondrial ribosomal protein of the small subunit; genetic interactions suggest a possible role in promoting translation initiation	1.22667	1705	No
PLP1	YDR183W	Protein that interacts with CCT (chaperonin containing TCP-1) complex and has a role in actin and tubulin folding; has weak similarity to phosducins, which are G-protein regulators	1.22633	1706	No
THI21	YPL258C	Hydroxymethylpyrimidine phosphate kinase, involved in the last steps in thiamine biosynthesis; member of a gene family with THI20 and THI22; Thi20p also has this activity	1.226	1707	No
HAT1	YPL001W	Catalytic subunit of the Hat1p-Hat2p histone acetyltransferase complex that uses the cofactor acetyl coenzyme A, to acetylate free nuclear and cytoplasmic histone H4; involved in telomeric silencing and DNA double-strand break repair	1.22567	1708	No
BRL1	YHR036W	Essential nuclear envelope integral membrane protein identified as a suppressor of a conditional mutation in the major karyopherin, CRM1; homologous to and interacts with Brr6p, a nuclear envelope protein involved in nuclear export	1.22533	1709	No
GFA1	YKL104C	Glutamine-fructose-6-phosphate amidotransferase, catalyzes the formation of glucosamine-6-P and glutamate from fructose-6-P and glutamine in the first step of chitin biosynthesis	1.22533	1710	No
YLR414C	YLR414C	Putative protein of unknown function; localizes to bud and cytoplasm; co-localizes with Sur7p in punctate patches in the plasma membrane; null mutant displays decreased thermotolerance; transcription induced on cell wall damage	1.22533	1711	No
END3	YNL084C	EH domain-containing protein involved in endocytosis, actin cytoskeletal organization and cell wall morphogenesis; forms a complex with Sla1p and Pan1p	1.225	1712	No
YER071C	YER071C	Protein of unknown function; green fluorescent protein (GFP)-fusion protein localizes to the cytoplasm in a punctate pattern	1.225	1713	No
MNI1	YIL110W	Putative S-adenosylmethionine-dependent methyltransferase of the seven beta-strand family; deletion mutant exhibits a weak vacuolar protein sorting defect, enhanced resistance to caspofungin, and is synthetically lethal with MEN mutants	1.225	1714	No
YBL010C	YBL010C	Putative protein of unknown function; green fluorescent protein (GFP)-fusion protein colocalizes with clathrin-coated vesicles	1.225	1715	No
YJR008W	YJR008W	Putative protein of unknown function; expression repressed by inosine and choline in an Opi1p-dependent manner; expression induced by mild heat-stress on a non-fermentable carbon source.	1.225	1716	No
ERG5	YMR015C	C-22 sterol desaturase, a cytochrome P450 enzyme that catalyzes the formation of the C-22(23) double bond in the sterol side chain in ergosterol biosynthesis; may be a target of azole antifungal drugs	1.225	1717	No
SPE4	YLR146C	Spermine synthase, required for the biosynthesis of spermine and also involved in biosynthesis of pantothenic acid	1.225	1718	No
YBR242W	YBR242W	Putative protein of unknown function; green fluorescent protein (GFP)-fusion protein localizes to the cytoplasm and nucleus; YBR242W is not an essential gene	1.225	1719	No
MRM2	YGL136C	Mitochondrial 2' O-ribose methyltransferase, required for methylation of U(2791) in 21S rRNA; MRM2 deletion confers thermosensitive respiration and loss of mitochondrial DNA; has similarity to Spb1p and Trm7p, and to E. coli FtsJ/RrmJ	1.225	1720	No
YGR266W	YGR266W	Protein of unknown function, predicted to contain a single transmembrane domain; localized to both the mitochondrial outer membrane and the plasma membrane	1.22467	1721	No
EDC3	YEL015W	Non-essential conserved protein of unknown function, plays a role in mRNA decapping by specifically affecting the function of the decapping enzyme Dcp1p; localizes to cytoplasmic mRNA processing bodies	1.2245	1722	No
CAF16	YFL028C	Part of the evolutionarily-conserved CCR4-NOT transcriptional regulatory complex involved in controlling mRNA initiation, elongation, and degradation; putative ABC ATPase; interacts with Ssn2p, Ssn3p, and Ssn8p	1.224	1723	No
AIM31	YML030W	Putative protein of unknown function; GFP-fusion protein localizes to mitochondria; null mutant is viable and displays reduced frequency of mitochondrial genome loss	1.224	1724	No
PAM16	YJL104W	Constituent of the import motor (PAM complex) component of the Translocase of the Inner Mitochondrial membrane (TIM23 complex); forms a 1:1 subcomplex with Pam18p and inhibits its cochaperone activity; contains a J-like domain	1.224	1725	No
MRPL9	YGR220C	Mitochondrial ribosomal protein of the large subunit	1.22368	1726	Yes
IMD2	YHR216W	Inosine monophosphate dehydrogenase, catalyzes the first step of GMP biosynthesis, expression is induced by mycophenolic acid resulting in resistance to the drug, expression is repressed by nutrient limitation	1.22367	1727	No
SYN8	YAL014C	Endosomal SNARE related to mammalian syntaxin 8	1.22367	1728	No
GVP36	YIL041W	BAR domain-containing protein that localizes to both early and late Golgi vesicles; required for adaptation to varying nutrient concentrations, fluid-phase endocytosis, polarization of the actin cytoskeleton, and vacuole biogenesis	1.22367	1729	No
OST6	YML019W	Subunit of the oligosaccharyltransferase complex of the ER lumen, which catalyzes asparagine-linked glycosylation of newly synthesized proteins; similar to and partially functionally redundant with Ost3p	1.223	1730	No
YJL185C	YJL185C	Putative protein of unknown function; mRNA is weakly cell cycle regulated, peaking in G2 phase; YJL185C is a non-essential gene	1.223	1731	No
YNL114C	YNL114C	Dubious open reading frame unlikely to encode a protein, based on available experimental and comparative sequence data; completely overlaps the verified ORF RPC19/YNL113W, an RNA polymerase subunit	1.223	1732	No
MGE1	YOR232W	Mitochondrial matrix cochaperone, acts as a nucleotide release factor for Ssc1p in protein translocation and folding; also acts as cochaperone for Ssq1p in folding of Fe-S cluster proteins; homolog of E. coli GrpE	1.22267	1733	No
BCS1	YDR375C	Protein of the mitochondrial inner membrane that functions as an ATP-dependent chaperone, required for the incorporation of the Rip1p and Qcr10p subunits into the cytochrome bc(1) complex; member of the CDC48/PAS1/SEC18 ATPase family	1.22233	1734	No
DBP3	YGL078C	Putative ATP-dependent RNA helicase of the DEAD-box family involved in ribosomal biogenesis	1.22226	1735	Yes
YGL079W	YGL079W	Putative protein of unknown function; green fluorescent protein (GFP)-fusion protein localizes to the endosome; identified as a transcriptional activator in a high-throughput yeast one-hybrid assay	1.222	1736	No
YGL185C	YGL185C	Putative protein with sequence similarity to hydroxyacid dehydrogenases; green fluorescent protein (GFP)-fusion protein localizes to the cytoplasm	1.222	1737	No
GAL80	YML051W	Transcriptional regulator involved in the repression of GAL genes in the absence of galactose; inhibits transcriptional activation by Gal4p; inhibition relieved by Gal3p or Gal1p binding	1.222	1738	No
YKL070W	YKL070W	Putative protein of unknown function; expression induced in cells treated with mycotoxins patulin or citrinin; the authentic, non-tagged protein is detected in highly purified mitochondria in high-throughput studies	1.22167	1739	No
YLR118C	YLR118C	Acyl-protein thioesterase responsible for depalmitoylation of Gpa1p; green fluorescent protein (GFP)-fusion protein localizes to both the cytoplasm and nucleus and is induced in response to the DNA-damaging agent MMS	1.22167	1740	No
GPI1	YGR216C	Membrane protein involved in the synthesis of N-acetylglucosaminyl phosphatidylinositol (GlcNAc-PI), the first intermediate in the synthesis of glycosylphosphatidylinositol (GPI) anchors; human and mouse GPI1p are functional homologs	1.22167	1741	No
CDC24	YAL041W	Guanine nucleotide exchange factor (GEF or GDP-release factor) for Cdc42p; required for polarity establishment and maintenance, and mutants have morphological defects in bud formation and shmooing	1.22167	1742	No
FCY21	YER060W	Putative purine-cytosine permease, very similar to Fcy2p but cannot substitute for its function	1.22167	1743	No
YJL068C	YJL068C	Non-essential intracellular esterase that can function as an S-formylglutathione hydrolase; may be involved in the detoxification of formaldehyde, which can be metabolized to S-formylglutathione; similar to human esterase D	1.22167	1744	No
RGM1	YMR182C	Putative transcriptional repressor with proline-rich zinc fingers; overproduction impairs cell growth	1.22167	1745	No
RPC17	YJL011C	RNA polymerase III subunit C17; physically interacts with C31, C11, and TFIIIB70; may be involved in the recruitment of pol III by the preinitiation complex	1.22167	1746	No
RPS3	YNL178W	Protein component of the small (40S) ribosomal subunit, has apurinic/apyrimidinic (AP) endonuclease activity; essential for viability; has similarity to E. coli S3 and rat S3 ribosomal proteins	1.22137	1747	Yes
BAT2	YJR148W	Cytosolic branched-chain amino acid aminotransferase, homolog of murine ECA39; highly expressed during stationary phase and repressed during logarithmic phase	1.22133	1748	No
SCS2	YER120W	Integral ER membrane protein that regulates phospholipid metabolism via an interaction with the FFAT motif of Opi1p, also involved in telomeric silencing, disruption causes inositol auxotrophy above 34 degrees C, VAP homolog	1.22133	1749	No
POM152	YMR129W	Nuclear pore membrane glycoprotein; may be involved in duplication of nuclear pores and nuclear pore complexes during S-phase;	1.22133	1750	No
OMS1	YDR316W	Protein integral to the mitochondrial membrane; has a conserved methyltransferase motif; multicopy suppressor of respiratory defects caused by OXA1 mutations	1.221	1751	No
YML018C	YML018C	Putative protein of unknown function; green fluorescent protein (GFP)-fusion protein localizes to the membrane of the vacuole; physical interaction with Atg27p suggests a possible role in autophagy; YML018C is not an essential gene	1.22067	1752	No
CPD1	YGR247W	Cyclic nucleotide phosphodiesterase, hydrolyzes ADP-ribose 1'', 2''-cyclic phosphate to ADP-ribose 1''-phosphate; may have a role in tRNA splicing; no detectable phenotype is conferred by null mutation or by overexpression	1.22067	1753	No
NNT1	YLR285W	Putative nicotinamide N-methyltransferase, has a role in rDNA silencing and in lifespan determination	1.22067	1754	No
YLR345W	YLR345W	Similar to 6-phosphofructo-2-kinase/fructose-2,6-bisphosphatase enzymes responsible for the metabolism of fructoso-2,6-bisphosphate; mRNA expression is repressed by the Rfx1p-Tup1p-Ssn6p repressor complex; YLR345W is not an essential gene	1.22067	1755	No
FRE1	YLR214W	Ferric reductase and cupric reductase, reduces siderophore-bound iron and oxidized copper prior to uptake by transporters; expression induced by low copper and iron levels	1.22067	1756	No
ILV5	YLR355C	Acetohydroxyacid reductoisomerase, mitochondrial protein involved in branched-chain amino acid biosynthesis, also required for maintenance of wild-type mitochondrial DNA and found in mitochondrial nucleoids	1.22067	1757	No
PAM18	YLR008C	Constituent of the import motor (PAM complex) component of the Translocase of the Inner Mitochondrial membrane (TIM23 complex); essential J-protein cochaperone that stimulates Ssc1p ATPase activity to drive import; inhibited by Pam16p	1.22067	1758	No
TVP18	YMR071C	Integral membrane protein localized to late Golgi vesicles along with the v-SNARE Tlg2p; may interact with ribosomes, based on co-purification experiments	1.22033	1759	No
SKS1	YPL026C	Putative serine/threonine protein kinase; involved in the adaptation to low concentrations of glucose independent of the SNF3 regulated pathway	1.22033	1760	No
YCT1	YLL055W	High-affinity cysteine-specific transporter with similarity to the Dal5p family of transporters; green fluorescent protein (GFP)-fusion protein localizes to the endoplasmic reticulum; YCT1 is not an essential gene	1.22	1761	No
RTT10	YPL183C	Cytoplasmic protein with a role in regulation of Ty1 transposition	1.21867	1762	No
PCM1	YEL058W	Essential N-acetylglucosamine-phosphate mutase; converts GlcNAc-6-P to GlcNAc-1-P, which is a precursor for the biosynthesis of chitin and for the formation of N-glycosylated mannoproteins and glycosylphosphatidylinositol anchors	1.21833	1763	No
YCR064C	YCR064C	Dubious open reading frame unlikely to encode a protein, based on experimental and comparative sequence data; partially overlaps the verified gene BUD31	1.21833	1764	No
BDH1	YAL060W	NAD-dependent (R,R)-butanediol dehydrogenase, catalyzes oxidation of (R,R)-2,3-butanediol to (3R)-acetoin, oxidation of meso-butanediol to (3S)-acetoin, and reduction of acetoin; enhances use of 2,3-butanediol as an aerobic carbon source	1.218	1765	No
CST9	YLR394W	SUMO E3 ligase; required for synaptonemal complex formation; localizes to synapsis initiation sites on meiotic chromosomes; potential Cdc28p substrate	1.218	1766	No
YLR126C	YLR126C	Putative protein of unknown function with similarity to glutamine amidotransferase proteins; has Aft1p-binding motif in the promoter; may be involved in copper and iron homeostasis; YLR126C is not an essential protein	1.218	1767	No
RTR1	YER139C	Protein with a role in transcription; interacts with Rpo21p; has a cysteine-rich motif required for function and conserved in eukaryotes; shuttles between the nucleus and cytoplasm; RTR1 shows genetic interactions with RPB4, 5, 7, and 9	1.218	1768	No
YGR290W	YGR290W	Dubious open reading frame unlikely to encode a protein, based on available experimental and comparative sequence data; putative HLH protein; partially overlaps the verified ORF MAL11/YGR289C (a high-affinity maltose transporter)	1.218	1769	No
PHO81	YGR233C	Cyclin-dependent kinase (CDK) inhibitor, regulates Pho80p-Pho85p and Pcl7p-Pho85p cyclin-CDK complexes in response to phosphate levels; inhibitory activity for Pho80p-Pho85p requires myo-D-inositol heptakisphosphate (IP7) generated by Vip1p	1.218	1770	No
DCS2	YOR173W	Non-essential, stress induced regulatory protein containing a HIT (histidine triad) motif; modulates m7G-oligoribonucleotide metabolism; inhibits Dcs1p; regulated by Msn2p, Msn4p, and the Ras-cAMP-cAPK signaling pathway, similar to Dcs1p.	1.218	1771	No
PNP1	YLR209C	Purine nucleoside phosphorylase, specifically metabolizes inosine and guanosine nucleosides; involved in the nicotinamide riboside salvage pathway	1.218	1772	No
MMS2	YGL087C	Ubiquitin-conjugating enzyme variant involved in error-free postreplication repair; forms a heteromeric complex with Ubc13p, an active ubiquitin-conjugating enzyme; cooperates with chromatin-associated RING finger proteins, Rad18p and Rad5p	1.218	1773	No
PAP1	YKR002W	Poly(A) polymerase, one of three factors required for mRNA 3'-end polyadenylation, forms multiprotein complex with polyadenylation factor I (PF I), also required for mRNA nuclear export; may also polyadenylate rRNAs	1.21795	1774	Yes
TMA23	YMR269W	Nucleolar protein of unknown function implicated in ribosome biogenesis; TMA23 may be a fungal-specific gene as no homologs have been yet identified in higher eukaryotes	1.21767	1775	No
PML39	YML107C	Protein required for nuclear retention of unspliced pre-mRNAs along with Mlp1p and Pml1p; anchored to nuclear pore complex via Mlp1p and Mlp2p; found with the subset of nuclear pores farthest from the nucleolus; may interact with ribosomes	1.21767	1776	No
YBL104C	YBL104C	Putative protein of unknown function, promoter contains multiple GCN4 binding sites	1.21767	1777	No
SBA1	YKL117W	Co-chaperone that binds to and regulates Hsp90 family chaperones; important for pp60v-src activity in yeast; homologous to the mammalian p23 proteins and like p23 can regulate telomerase activity	1.2175	1778	No
SRX1	YKL086W	Sulfiredoxin, contributes to oxidative stress resistance by reducing cysteine-sulfinic acid groups in the peroxiredoxins Tsa1p and Ahp1p that are formed upon exposure to oxidants; conserved in higher eukaryotes	1.21733	1779	No
GCN5	YGR252W	Histone acetyltransferase, acetylates N-terminal lysines on histones H2B and H3; catalytic subunit of the ADA and SAGA histone acetyltransferase complexes; founding member of the Gcn5p-related N-acetyltransferase superfamily	1.21733	1780	No
YPR050C	YPR050C	Dubious open reading frame unlikely to encode a protein, based on available experimental and comparative sequence data; partially overlaps the verified gene MAK3/YPR051W	1.21733	1781	No
UTR1	YJR049C	ATP-NADH kinase; phosphorylates both NAD and NADH; active as a hexamer; enhances the activity of ferric reductase (Fre1p)	1.21733	1782	No
YJL182C	YJL182C	Dubious open reading frame unlikely to encode a protein, based on available experimental and comparative sequence data; partially overlaps uncharacterized ORF YJL181W	1.21733	1783	No
YCL047C	YCL047C	Putative protein of unknown function	1.21733	1784	No
CRR1	YLR213C	Putative glycoside hydrolase of the spore wall envelope; required for normal spore wall assembly, possibly for cross-linking between the glucan and chitosan layers; expressed during sporulation	1.21733	1785	No
OAF1	YAL051W	Oleate-activated transcription factor, acts alone and as a heterodimer with Pip2p; activates genes involved in beta-oxidation of fatty acids and peroxisome organization and biogenesis	1.21733	1786	No
YAR075W	YAR075W	Non-functional protein with homology IMP dehydrogenase; YAR073W/IMD1 and YAR075W comprise a continuous reading frame in some strains of S. cerevisiae.	1.21733	1787	No
RFC2	YJR068W	Subunit of heteropentameric Replication factor C (RF-C), which is a DNA binding protein and ATPase that acts as a clamp loader of the proliferating cell nuclear antigen (PCNA) processivity factor for DNA polymerases delta and epsilon	1.21733	1788	No
CDC26	YFR036W	Subunit of the Anaphase-Promoting Complex/Cyclosome (APC/C), which is a ubiquitin-protein ligase required for degradation of anaphase inhibitors, including mitotic cyclins, during the metaphase/anaphase transition	1.217	1789	No
MSN5	YDR335W	Karyopherin involved in nuclear import and export; shown to be responsible for nuclear import of replication protein A and for export of several proteins including Swi6p, Far1p, and Pho4p; cargo dissociation involves binding to RanGTP	1.217	1790	No
NBP1	YLR457C	Spindle pole body (SPB) component, required for the insertion of the duplication plaque into the nuclear membrane during SPB duplication; essential for bipolar spindle formation; component of the Mps2p-Bbp1p complex	1.217	1791	No
ESS1	YJR017C	Peptidylprolyl-cis/trans-isomerase (PPIase) specific for phosphorylated serine and threonine residues N-terminal to proline; regulates phosphorylation of the RNA polymerase II large subunit (Rpo21p) C-terminal domain	1.21667	1792	No
UBC6	YER100W	Ubiquitin-conjugating enzyme involved in ER-associated protein degradation; located at the cytosolic side of the ER membrane; tail region contains a transmembrane segment at the C-terminus; substrate of the ubiquitin-proteasome pathway	1.21667	1793	No
PEX12	YMR026C	C3HC4-type RING-finger peroxisomal membrane peroxin required for peroxisome biogenesis and peroxisomal matrix protein import; forms translocation subcomplex with Pex2p and Pex10p; mutations in human homolog cause peroxisomal disorders	1.21667	1794	No
MRPL20	YKR085C	Mitochondrial ribosomal protein of the large subunit	1.216	1795	Yes
RED1	YLR263W	Protein component of the axial elements of the synaptonemal complex, involved in chromosome segregation during the first meiotic division; interacts with Hop1p; required for wild-type levels of Mek1p kinase activity	1.216	1796	No
YMR245W	YMR245W	Dubious open reading frame unlikely to encode a functional protein, based on available experimental and comparative sequence data	1.216	1797	No
SLX4	YLR135W	Endonuclease involved in processing DNA during recombination and repair; cleaves branched structures in a complex with Slx1p; involved in Rad1p/Rad10p-dependent removal of 3'-nonhomologous tails during DSBR via single-strand annealing	1.216	1798	No
RMA1	YKL132C	Putative dihydrofolate synthetase; has similarity to Fol3p and to E. coli folylpolyglutamate synthetase/dihydrofolate synthetase; the authentic, non-tagged protein is detected in highly purified mitochondria in high-throughput studies	1.216	1799	No
YHR112C	YHR112C	Putative protein of unknown function; green fluorescent protein (GFP)-fusion protein localizes to the cytoplasm	1.216	1800	No
DIP5	YPL265W	Dicarboxylic amino acid permease, mediates high-affinity and high-capacity transport of L-glutamate and L-aspartate; also a transporter for Gln, Asn, Ser, Ala, and Gly	1.216	1801	No
YDR514C	YDR514C	Putative protein of unknown function	1.216	1802	No
MRPL38	YKL170W	Mitochondrial ribosomal protein of the large subunit; appears as two protein spots (YmL34 and YmL38) on two-dimensional SDS gels	1.21569	1803	Yes
PHD1	YKL043W	Transcriptional activator that enhances pseudohyphal growth; regulates expression of FLO11, an adhesin required for pseudohyphal filament formation; similar to StuA, an A. nidulans developmental regulator; potential Cdc28p substrate	1.21567	1804	No
MBR1	YKL093W	Protein involved in mitochondrial functions and stress response; overexpression suppresses growth defects of hap2, hap3, and hap4 mutants	1.2155	1805	No
EXG1	YLR300W	Major exo-1,3-beta-glucanase of the cell wall, involved in cell wall beta-glucan assembly; exists as three differentially glycosylated isoenzymes	1.2155	1806	No
PDX3	YBR035C	Pyridoxine (pyridoxamine) phosphate oxidase, has homologs in E. coli and Myxococcus xanthus; transcription is under the general control of nitrogen metabolism	1.2155	1807	No
YNL058C	YNL058C	Putative protein of unknown function; green fluorescent protein (GFP)-fusion protein localizes to the vacuole; YNL058C is not an essential gene	1.2155	1808	No
ERG20	YJL167W	Farnesyl pyrophosphate synthetase, has both dimethylallyltranstransferase and geranyltranstransferase activities; catalyzes the formation of C15 farnesyl pyrophosphate units for isoprenoid and sterol biosynthesis	1.2155	1809	No
GRE2	YOL151W	3-methylbutanal reductase and NADPH-dependent methylglyoxal reductase (D-lactaldehyde dehydrogenase); stress induced (osmotic, ionic, oxidative, heat shock and heavy metals); regulated by the HOG pathway	1.215	1810	No
LAS17	YOR181W	Actin assembly factor, activates the Arp2/3 protein complex that nucleates branched actin filaments; localizes with the Arp2/3 complex to actin patches; homolog of the human Wiskott-Aldrich syndrome protein (WASP)	1.215	1811	No
SBP1	YHL034C	Putative RNA binding protein; involved in translational repression and found in cytoplasmic P bodies; found associated with small nucleolar RNAs snR10 and snR11	1.21487	1812	Yes
HLR1	YDR528W	Protein involved in regulation of cell wall composition and integrity and response to osmotic stress; overproduction suppresses a lysis sensitive PKC mutation; similar to Lre1p, which functions antagonistically to protein kinase A	1.21467	1813	No
YPL261C	YPL261C	Dubious open reading frame unlikely to encode a protein; partially overlaps the uncharacterized ORF YPL260W	1.21467	1814	No
CKI1	YLR133W	Choline kinase, catalyzing the first step in phosphatidylcholine synthesis via the CDP-choline (Kennedy pathway); exhibits some ethanolamine kinase activity contributing to phosphatidylethanolamine synthesis via the CDP-ethanolamine pathway	1.21367	1815	No
YHL018W	YHL018W	Putative protein of unknown function; green fluorescent protein (GFP)-fusion protein localizes to mitochondria and is induced in response to the DNA-damaging agent MMS	1.21333	1816	No
FUN26	YAL022C	Nucleoside transporter with broad nucleoside selectivity; localized to intracellular membranes	1.21333	1817	No
MBF1	YOR298C-A	Transcriptional coactivator that bridges the DNA-binding region of Gcn4p and TATA-binding protein Spt15p; suppressor of frameshift mutations	1.213	1818	No
SWI3	YJL176C	Subunit of the SWI/SNF chromatin remodeling complex, which regulates transcription by remodeling chromosomes; required for transcription of many genes, including ADH1, ADH2, GAL1, HO, INO1 and SUC2	1.213	1819	No
YLR428C	YLR428C	Dubious open reading frame unlikely to encode a protein, based on available experimental and comparative sequence data; partially overlaps the verified ORF CRN1	1.213	1820	No
CGI121	YML036W	Protein involved in telomere uncapping and elongation as component of the KEOPS protein complex with Bud32p, Kae1p, Pcc1p, and Gon7p; also shown to be a component of the EKC protein complex; homolog of human CGI-121	1.21233	1821	No
COG7	YGL005C	Component of the conserved oligomeric Golgi complex (Cog1p through Cog8p), a cytosolic tethering complex that functions in protein trafficking to mediate fusion of transport vesicles to Golgi compartments	1.212	1822	No
PFS2	YNL317W	Integral subunit of the pre-mRNA cleavage and polyadenylation factor (CPF) complex; plays an essential role in mRNA 3'-end formation by bridging different processing factors and thereby promoting the assembly of the processing complex	1.212	1823	Yes
YEL043W	YEL043W	Predicted cytoskeleton protein involved in intracellular signalling based on quantitative analysis of protein-protein interaction maps; may interact with ribosomes, based on co-purification studies; contains fibronectin type III domain fold	1.212	1824	No
GAD1	YMR250W	Glutamate decarboxylase, converts glutamate into gamma-aminobutyric acid (GABA) during glutamate catabolism; involved in response to oxidative stress	1.212	1825	No
ARC18	YLR370C	Subunit of the ARP2/3 complex, which is required for the motility and integrity of cortical actin patches	1.21167	1826	No
NTG2	YOL043C	DNA N-glycosylase and apurinic/apyrimidinic (AP) lyase involved in base excision repair, localizes to the nucleus; sumoylated	1.21167	1827	No
CRN1	YLR429W	Coronin, cortical actin cytoskeletal component that associates with the Arp2p/Arp3p complex to regulate its activity; plays a role in regulation of actin patch assembly	1.21167	1828	No
MCM16	YPR046W	Protein involved in kinetochore-microtubule mediated chromosome segregation; binds to centromere DNA	1.21167	1829	No
BGL2	YGR282C	Endo-beta-1,3-glucanase, major protein of the cell wall, involved in cell wall maintenance	1.21167	1830	No
GRH1	YDR517W	Acetylated, cis-golgi localized protein involved in ER to Golgi transport; homolog of human GRASP65; forms a complex with the coiled-coil protein Bug1p; mutants are compromised for the fusion of ER-derived vesicles with Golgi membranes	1.21167	1831	No
RGR1	YLR071C	Subunit of the RNA polymerase II mediator complex; associates with core polymerase subunits to form the RNA polymerase II holoenzyme; required for glucose repression, HO repression, RME1 repression and sporulation	1.21167	1832	No
SSO1	YPL232W	Plasma membrane t-SNARE involved in fusion of secretory vesicles at the plasma membrane and in vesicle fusion during sporulation; forms a complex with Sec9p that binds v-SNARE Snc2p; syntaxin homolog; functionally redundant with Sso2p	1.21167	1833	No
YJL070C	YJL070C	Putative protein of unknown function with similarity to AMP deaminases; the authentic, non-tagged protein is detected in highly purified mitochondria in high-throughput studies; YJL070C is a non-essential gene	1.21167	1834	No
COA1	YIL157C	Mitochondrial inner membrane protein required for assembly of the cytochrome c oxidase complex (complex IV); interacts with complex IV assembly factor Shy1p during the early stages of assembly	1.21167	1835	No
YML010C-B	YML010C-B	Dubious ORF unlikely to encode a functional protein, based on available experimental and comparative sequence data; deletion mutation confers an increase in Ty1 transposition	1.21167	1836	No
RFC1	YOR217W	Subunit of heteropentameric Replication factor C (RF-C), which is a DNA binding protein and ATPase that acts as a clamp loader of the proliferating cell nuclear antigen (PCNA) processivity factor for DNA polymerases delta and epsilon	1.21133	1837	No
RPL21B	YPL079W	Protein component of the large (60S) ribosomal subunit, nearly identical to Rpl21Ap and has similarity to rat L21 ribosomal protein	1.211	1838	Yes
REX2	YLR059C	3'-5' RNA exonuclease; involved in 3'-end processing of U4 and U5 snRNAs, 5S and 5.8S rRNAs, and RNase P and RNase MRP RNA; localized to mitochondria and null suppresses escape of mtDNA to nucleus in yme1 yme2 mutants; RNase D exonuclease	1.211	1839	No
GRX3	YDR098C	Hydroperoxide and superoxide-radical responsive glutathione-dependent oxidoreductase; monothiol glutaredoxin subfamily member along with Grx4p and Grx5p; protects cells from oxidative damage	1.211	1840	No
HIR1	YBL008W	Subunit of the HIR complex, a nucleosome assembly complex involved in regulation of histone gene transcription; contributes to nucleosome formation, heterochromatic gene silencing, and formation of functional kinetochores	1.211	1841	No
COG8	YML071C	Component of the conserved oligomeric Golgi complex (Cog1p through Cog8p), a cytosolic tethering complex that functions in protein trafficking to mediate fusion of transport vesicles to Golgi compartments	1.211	1842	No
PRB1	YEL060C	Vacuolar proteinase B (yscB), a serine protease of the subtilisin family; involved in protein degradation in the vacuole and required for full protein degradation during sporulation	1.21067	1843	No
PRP45	YAL032C	Protein required for pre-mRNA splicing; associates with the spliceosome and interacts with splicing factors Prp22p and Prp46p; orthologous to human transcriptional coactivator SKIP and can activate transcription of a reporter gene	1.21053	1844	Yes
PGA2	YNL149C	Essential protein required for maturation of Gas1p and Pho8p; involved in protein trafficking; GFP-fusion protein localizes to the ER and YFP-fusion protein to the nuclear envelope-ER network; null mutants have a cell separation defect	1.21033	1845	No
MSN4	YKL062W	Transcriptional activator related to Msn2p; activated in stress conditions, which results in translocation from the cytoplasm to the nucleus; binds DNA at stress response elements of responsive genes, inducing gene expression	1.21033	1846	No
BST1	YFL025C	GPI inositol deacylase of the ER that negatively regulates COPII vesicle formation, prevents production of vesicles with defective subunits, required for proper discrimination between resident ER proteins and Golgi-bound cargo molecules	1.21	1847	No
RPS14B	YJL191W	Ribosomal protein 59 of the small subunit, required for ribosome assembly and 20S pre-rRNA processing; mutations confer cryptopleurine resistance; nearly identical to Rps14Ap and similar to E. coli S11 and rat S14 ribosomal proteins	1.20976	1848	Yes
RRT7	YLL030C	Identified in a screen for mutants with increased levels of rDNA transcription; dubious open reading frame unlikely to encode a protein, based on available experimental and comparative sequence data	1.20967	1849	No
URA8	YJR103W	Minor CTP synthase isozyme (see also URA7), catalyzes the ATP-dependent transfer of the amide nitrogen from glutamine to UTP, forming CTP, the final step in de novo biosynthesis of pyrimidines; involved in phospholipid biosynthesis	1.20933	1850	No
TNA1	YGR260W	High affinity nicotinic acid plasma membrane permease, responsible for uptake of low levels of nicotinic acid; expression of the gene increases in the absence of extracellular nicotinic acid or para-aminobenzoate (PABA)	1.209	1851	No
YMR031W-A	YMR031W-A	Dubious open reading frame unlikely to encode a protein, based on available experimental and comparative sequence data; null mutant displays shortened telomeres; partially overlaps the uncharacterized ORF YMR031C	1.208	1852	No
YBR174C	YBR174C	Dubious open reading frame unlikely to encode a protein, based on available experimental and comparative sequence data; partially overlaps the verified ORF YBR175W; null mutant is viable and sporulation defective	1.208	1853	No
UAF30	YOR295W	Subunit of UAF (upstream activation factor), which is an RNA polymerase I specific transcription stimulatory factor composed of Uaf30p, Rrn5p, Rrn9p, Rrn10p, histones H3 and H4; deletion decreases cellular growth rate	1.208	1854	No
NSE1	YLR007W	Essential subunit of the Mms21-Smc5-Smc6 complex; nuclear protein required for DNA repair and growth; has a nonstructural role in the maintenance of chromosomes	1.208	1855	No
DML1	YMR211W	Essential protein involved in mtDNA inheritance, may also function in the partitioning of the mitochondrial organelle or in the segregation of chromosomes, exhibits regions similar to members of a GTPase family	1.208	1856	No
ECM22	YLR228C	Sterol regulatory element binding protein, regulates transcription of sterol biosynthetic genes; contains Zn[2]-Cys[6] binuclear cluster; homologous to Upc2p; relocates from intracellular membranes to perinuclear foci on sterol depletion	1.208	1857	No
NGR1	YBR212W	RNA binding protein that negatively regulates growth rate; interacts with the 3' UTR of the mitochondrial porin (POR1) mRNA and enhances its degradation; overexpression impairs mitochondrial function; expressed in stationary phase	1.20783	1858	Yes
FIT2	YOR382W	Mannoprotein that is incorporated into the cell wall via a glycosylphosphatidylinositol (GPI) anchor, involved in the retention of siderophore-iron in the cell wall	1.20767	1859	No
MNN1	YER001W	Alpha-1,3-mannosyltransferase, integral membrane glycoprotein of the Golgi complex, required for addition of alpha1,3-mannose linkages to N-linked and O-linked oligosaccharides, one of five S. cerevisiae proteins of the MNN1 family	1.207	1860	No
YMR324C	YMR324C	Dubious open reading frame unlikely to encode a protein, based on experimental and comparative sequence data; transcription is AZF1 dependent in glycerol-lactate medium and SLT2 dependent in response to the lipid hydroperoxides	1.207	1861	No
SDH1	YKL148C	Flavoprotein subunit of succinate dehydrogenase (Sdh1p, Sdh2p, Sdh3p, Sdh4p), which couples the oxidation of succinate to the transfer of electrons to ubiquinone	1.207	1862	No
SED5	YLR026C	cis-Golgi t-SNARE syntaxin required for vesicular transport between the ER and the Golgi complex, binds at least 9 SNARE proteins	1.207	1863	No
MST27	YGL051W	Putative integral membrane protein, involved in vesicle formation; forms complex with Mst28p; member of DUP240 gene family; binds COPI and COPII vesicles	1.20633	1864	No
YML053C	YML053C	Putative protein of unknown function; green fluorescent protein (GFP)-fusion protein localizes to the cytoplasm and the nucleus; overexpression causes a cell cycle delay or arrest; YML053C is not an essential gene	1.20633	1865	No
UBP10	YNL186W	Ubiquitin-specific protease that deubiquitinates ubiquitin-protein moieties; may regulate silencing by acting on Sir4p; involved in posttranscriptionally regulating Gap1p and possibly other transporters; primarily located in the nucleus	1.20633	1866	No
FPR1	YNL135C	Peptidyl-prolyl cis-trans isomerase (PPIase), binds to the drugs FK506 and rapamycin; also binds to the nonhistone chromatin binding protein Hmo1p and may regulate its assembly or function	1.20633	1867	No
GPM1	YKL152C	Tetrameric phosphoglycerate mutase, mediates the conversion of 3-phosphoglycerate to 2-phosphoglycerate during glycolysis and the reverse reaction during gluconeogenesis	1.206	1868	No
SRP102	YKL154W	Signal recognition particle (SRP) receptor beta subunit; involved in SRP-dependent protein targeting; anchors Srp101p to the ER membrane	1.206	1869	No
ACO1	YLR304C	Aconitase, required for the tricarboxylic acid (TCA) cycle and also independently required for mitochondrial genome maintenance; phosphorylated; component of the mitochondrial nucleoid; mutation leads to glutamate auxotrophy	1.206	1870	No
UBC12	YLR306W	Enzyme that mediates the conjugation of Rub1p, a ubiquitin-like protein, to other proteins; related to E2 ubiquitin-conjugating enzymes	1.206	1871	No
PRP39	YML046W	U1 snRNP protein involved in splicing, contains multiple tetriatricopeptide repeats	1.20571	1872	Yes
SSA2	YLL024C	ATP binding protein involved in protein folding and vacuolar import of proteins; member of heat shock protein 70 (HSP70) family; associated with the chaperonin-containing T-complex; present in the cytoplasm, vacuolar membrane and cell wall	1.20567	1873	No
ERD1	YDR414C	Predicted membrane protein required for the retention of lumenal endoplasmic reticulum proteins; mutants secrete the endogenous ER protein, BiP (Kar2p)	1.20567	1874	No
IFA38	YBR159W	Microsomal beta-keto-reductase; contains oleate response element (ORE) sequence in the promoter region; mutants exhibit reduced VLCFA synthesis, accumulate high levels of dihydrosphingosine, phytosphingosine and medium-chain ceramides	1.20567	1875	No
SRP101	YDR292C	Signal recognition particle (SRP) receptor - alpha subunit; contain GTPase domains; involved in SRP-dependent protein targeting; interacts with Srp102p	1.20567	1876	No
IDI1	YPL117C	Isopentenyl diphosphate:dimethylallyl diphosphate isomerase (IPP isomerase), catalyzes an essential activation step in the isoprenoid biosynthetic pathway; required for viability	1.20567	1877	No
VTC4	YJL012C	Vacuolar membrane protein involved in vacuolar polyphosphate accumulation; functions as a regulator of vacuolar H+-ATPase activity and vacuolar transporter chaperones; involved in non-autophagic vacuolar fusion	1.20567	1878	No
DER1	YBR201W	Endoplasmic reticulum membrane protein, required for ER-associated protein degradation of misfolded or unassembled proteins; N- and C- termini protrude into the cytoplasm, has similarity to Dfm1p	1.20567	1879	No
SUR4	YLR372W	Elongase, involved in fatty acid and sphingolipid biosynthesis; synthesizes very long chain 20-26-carbon fatty acids from C18-CoA primers; involved in regulation of sphingolipid biosynthesis	1.20567	1880	No
YKL047W	YKL047W	Putative protein of unknown function, predicted to be palmitoylated; green fluorescent protein (GFP)-fusion protein localizes to the cytoplasm	1.20567	1881	No
TPK3	YKL166C	cAMP-dependent protein kinase catalytic subunit; promotes vegetative growth in response to nutrients via the Ras-cAMP signaling pathway; inhibited by regulatory subunit Bcy1p in the absence of cAMP; partially redundant with Tpk1p and Tpk2p	1.20567	1882	No
MNN4	YKL201C	Putative positive regulator of mannosylphosphate transferase (Mnn6p), involved in mannosylphosphorylation of N-linked oligosaccharides; expression increases in late-logarithmic and stationary growth phases	1.20567	1883	No
COX13	YGL191W	Subunit VIa of cytochrome c oxidase, which is the terminal member of the mitochondrial inner membrane electron transport chain; not essential for cytochrome c oxidase activity but may modulate activity in response to ATP	1.20567	1884	No
CLP1	YOR250C	Subunit of cleavage factor I (CFI), involved in both the endonucleolyitc cleavage and polyadenylation steps of mRNA 3'-end maturation	1.20567	1885	Yes
YGR242W	YGR242W	Dubious open reading frame unlikely to encode a protein, based on available experimental and comparative sequence data; partially overlaps the verified ORF YAP1802/YGR241C	1.20533	1886	No
YIA6	YIL006W	Mitochondrial NAD+ transporter, involved in the transport of NAD+ into the mitochondria (see also YEA6); member of the mitochondrial carrier subfamily; disputed role as a pyruvate transporter; has putative mouse and human orthologs	1.20533	1887	No
BUD21	YOR078W	Component of small ribosomal subunit (SSU) processosome that contains U3 snoRNA; originally isolated as bud-site selection mutant that displays a random budding pattern	1.20528	1888	Yes
CDC50	YCR094W	Endosomal protein that interacts with phospholipid flippase Drs2p; interaction with Cdc50p is essential for Drs2p catalytic activity; mutations affect cell polarity and polarized growth; similar to Ynr048wp and Lem3p	1.20467	1889	No
TRR1	YDR353W	Cytoplasmic thioredoxin reductase, key regulatory enzyme that determines the redox state of the thioredoxin system, which acts as a disulfide reductase system and protects cells against both oxidative and reductive stress	1.20433	1890	No
YAR1	YPL239W	Cytoplasmic ankyrin-repeat containing protein of unknown function, proposed to link the processes of 40S ribosomal subunit biogenesis and adaptation to osmotic and oxidative stress; expression repressed by heat shock	1.20433	1891	No
PRR1	YKL116C	Serine/threonine protein kinase that inhibits pheromone induced signalling downstream of MAPK, possibly at the level of the Ste12p transcription factor	1.204	1892	No
YLR140W	YLR140W	Dubious open reading frame unlikely to encode a functional protein; overlaps essential RRN5 gene which encodes a member of the UAF transcription factor involved in transcription of rDNA by RNA polymerase I	1.204	1893	No
MRP4	YHL004W	Mitochondrial ribosomal protein of the small subunit	1.20336	1894	Yes
CCA1	YER168C	ATP (CTP):tRNA-specific tRNA nucleotidyltransferase; different forms targeted to the nucleus, cytosol, and mitochondrion are generated via the use of multiple transcriptional and translational start sites	1.20333	1895	Yes
YJR115W	YJR115W	Putative protein of unknown function	1.203	1896	No
RPL36A	YMR194W	N-terminally acetylated protein component of the large (60S) ribosomal subunit, nearly identical to Rpl36Bp and has similarity to rat L36 ribosomal protein; binds to 5.8 S rRNA	1.20288	1897	Yes
ATG19	YOL082W	Receptor protein specific for the cytoplasm-to-vacuole targeting (Cvt) pathway; delivers cargo proteins aminopeptidase I (Lap4p) and alpha-mannosidase (Ams1p) to the phagophore assembly site for packaging into Cvt vesicles	1.20267	1898	No
YMR086W	YMR086W	Protein of unknown function that may interact with ribosomes, based on co-purification experiments; GFP-fusion protein localizes to the cell periphery; possible component of the eisosome; expression is repressed by cAMP	1.20233	1899	No
AGX1	YFL030W	Alanine:glyoxylate aminotransferase (AGT), catalyzes the synthesis of glycine from glyoxylate, which is one of three pathways for glycine biosynthesis in yeast; has similarity to mammalian and plant alanine:glyoxylate aminotransferases	1.20233	1900	No
LIP5	YOR196C	Protein involved in biosynthesis of the coenzyme lipoic acid, has similarity to E. coli lipoic acid synthase	1.20233	1901	No
THI11	YJR156C	Protein involved in synthesis of the thiamine precursor hydroxymethylpyrimidine (HMP); member of a subtelomeric gene family including THI5, THI11, THI12, and THI13	1.20233	1902	No
UBP5	YER144C	Putative ubiquitin-specific protease, closest paralog of Doa4p but has no functional overlap; concentrates at the bud neck	1.202	1903	No
YMR099C	YMR099C	Glucose-6-phosphate 1-epimerase (hexose-6-phosphate mutarotase), likely involved in carbohydrate metabolism; GFP-fusion protein localizes to both the nucleus and cytoplasm and is induced in response to the DNA-damaging agent MMS	1.202	1904	No
YML089C	YML089C	Dubious open reading frame unlikely to encode a functional protein, based on available experimental and comparative sequence data; expression induced by calcium shortage	1.20133	1905	No
YJL114W	YJL114W	Retrotransposon TYA Gag gene co-transcribed with TYB Pol; translated as TYA or TYA-TYB polyprotein; Gag is a nucleocapsid protein that is the structural constituent of virus-like particles (VLPs); similar to retroviral Gag	1.20133	1906	No
GDE1	YPL110C	Glycerophosphocholine (GroPCho) phosphodiesterase; hydrolyzes GroPCho to choline and glycerolphosphate, for use as a phosphate source and as a precursor for phosphocholine synthesis; may interact with ribosomes	1.20133	1907	No
CHA4	YLR098C	DNA binding transcriptional activator, mediates serine/threonine activation of the catabolic L-serine (L-threonine) deaminase (CHA1); Zinc-finger protein with Zn[2]-Cys[6] fungal-type binuclear cluster domain	1.20133	1908	No
BEM3	YPL115C	Rho GTPase activating protein (RhoGAP) involved in control of the cytoskeleton organization; targets the essential Rho-GTPase Cdc42p, which controls establishment and maintenance of cell polarity, including bud-site assembly	1.20133	1909	No
IRC9	YJL142C	Dubious open reading frame unlikely to encode a protein, based on available experimental and comparative sequence data; partially overlaps verified gene YJL141C; null mutant displays increased levels of spontaneous Rad52p foci	1.20133	1910	No
EOS1	YNL080C	Protein involved in N-glycosylation; deletion mutation confers sensitivity to exidative stress and shows synthetic lethality with mutations in the spindle checkpoint genes BUB3 and MAD1; YNL080C is not an essential gene	1.20133	1911	No
POR1	YNL055C	Mitochondrial porin (voltage-dependent anion channel), outer membrane protein required for the maintenance of mitochondrial osmotic stability and mitochondrial membrane permeability; phosphorylated	1.20133	1912	No
RIM8	YGL046W	Protein of unknown function, involved in the proteolytic activation of Rim101p in response to alkaline pH; has similarity to A. nidulans PalF; essential for anaerobic growth	1.20133	1913	No
NMD4	YLR363C	Protein interacting with Nam7p, may be involved in the nonsense-mediated mRNA decay pathway	1.20133	1914	No
RRN10	YBL025W	Protein involved in promoting high level transcription of rDNA, subunit of UAF (upstream activation factor) for RNA polymerase I	1.20133	1915	No
YLR243W	YLR243W	Putative protein of unknown function; YLR243W is an essential gene	1.20133	1916	No
GYP1	YOR070C	Cis-golgi GTPase-activating protein (GAP) for the Rab family members Ypt1p (in vivo) and for Ypt1p, Sec4p, Ypt7p, and Ypt51p (in vitro); involved in vesicle docking and fusion	1.20133	1917	No
ERJ5	YFR041C	Type I membrane protein with a J domain is required to preserve the folding capacity of the endoplasmic reticulum; loss of the non-essential ERJ5 gene leads to a constitutively induced unfolded protein response	1.201	1918	No
RTN2	YDL204W	Protein of unknown function; has similarity to mammalian reticulon proteins; member of the RTNLA (reticulon-like A) subfamily	1.201	1919	No
TRM44	YPL030W	tRNA(Ser) Um(44) 2'-O-methyltransferase; involved in maintaining levels of the tRNA-Ser species tS(CGA) and tS(UGA); conserved among metazoans and fungi but there does not appear to be a homolog in plants; TRM44 is a non-essential gene	1.201	1920	No
MTC1	YJL123C	Protein of unknown function that may interact with ribosomes; green fluorescent protein (GFP)-fusion protein localizes to the cytoplasm and to COPI-coated vesicles (early Golgi); mtc1 is synthetically lethal with cdc13-1	1.201	1921	No
YKL151C	YKL151C	Putative protein of unknown function; YKL151C promoter contains STREs (stress response elements) and expression is induced by heat shock or methyl methanesulfonate; green fluorescent protein (GFP)-fusion protein localizes to the cytoplasm	1.20067	1922	No
UBX5	YDR330W	UBX (ubiquitin regulatory X) domain-containing protein that interacts with Cdc48p	1.20033	1923	No
SST2	YLR452C	GTPase-activating protein for Gpa1p, regulates desensitization to alpha factor pheromone; also required to prevent receptor-independent signaling of the mating pathway; member of the RGS (regulator of G-protein signaling) family	1.20033	1924	No
PAH1	YMR165C	Mg<sup>2+</sup>-dependent phosphatidate (PA) phosphatase, catalyzes the dephosphorylation of PA to yield diacylglycerol and P<sub>i</sub>, responsible for de novo lipid synthesis; homologous to mammalian lipin 1	1.20033	1925	No
YOR059C	YOR059C	Hypothetical protein	1.20033	1926	No
YIR040C	YIR040C	Dubious open reading frame unlikely to encode a protein, based on experimental and comparative sequence data	1.20033	1927	No
PRS1	YKL181W	5-phospho-ribosyl-1(alpha)-pyrophosphate synthetase, synthesizes PRPP, which is required for nucleotide, histidine, and tryptophan biosynthesis; one of five related enzymes, which are active as heteromultimeric complexes	1.20033	1928	No
YKL171W	YKL171W	Putative protein of unknown function; predicted protein kinase; implicated in proteasome function; epitope-tagged protein localizes to the cytoplasm	1.2	1929	No
URA6	YKL024C	Uridylate kinase, catalyzes the seventh enzymatic step in the de novo biosynthesis of pyrimidines, converting uridine monophosphate (UMP) into uridine-5'-diphosphate (UDP)	1.2	1930	No
SSK2	YNR031C	MAP kinase kinase kinase of the HOG1 mitogen-activated signaling pathway; interacts with Ssk1p, leading to autophosphorylation and activation of Ssk2p which phosphorylates Pbs2p; also mediates actin cytoskeleton recovery from osmotic stress	1.2	1931	No
COX4	YGL187C	Subunit IV of cytochrome c oxidase, the terminal member of the mitochondrial inner membrane electron transport chain; precursor N-terminal 25 residues are cleaved during mitochondrial import; phosphorylated; spermidine enhances translation	1.2	1932	No
BCK2	YER167W	Protein rich in serine and threonine residues involved in protein kinase C signaling pathway, which controls cell integrity; overproduction suppresses pkc1 mutations	1.2	1933	No
YBR206W	YBR206W	Dubious open reading frame unlikely to encode a protein, based on available experimental and comparative sequence data; partially overlaps the verified gene KTR3	1.2	1934	No
APT1	YML022W	Adenine phosphoribosyltransferase, catalyzes the formation of AMP from adenine and 5-phosphoribosylpyrophosphate; involved in the salvage pathway of purine nucleotide biosynthesis	1.2	1935	No
TLG2	YOL018C	Syntaxin-like t-SNARE that forms a complex with Tlg1p and Vti1p and mediates fusion of endosome-derived vesicles with the late Golgi; binds Vps45p, which prevents Tlg2p degradation and also facilitates t-SNARE complex formation	1.2	1936	No
OKP1	YGR179C	Outer kinetochore protein, required for accurate mitotic chromosome segregation; component of the kinetochore sub-complex COMA (Ctf19p, Okp1p, Mcm21p, Ame1p) that functions as a platform for kinetochore assembly	1.2	1937	No
CUS1	YMR240C	Protein required for assembly of U2 snRNP into the spliceosome, forms a complex with Hsh49p and Hsh155p	1.19986	1938	Yes
YIP5	YGL161C	Protein that interacts with Rab GTPases, localized to late Golgi vesicles; computational analysis of large-scale protein-protein interaction data suggests a possible role in vesicle-mediated transport	1.19967	1939	No
TIF2	YJL138C	Translation initiation factor eIF4A, identical to Tif1p; DEA(D/H)-box RNA helicase that couples ATPase activity to RNA binding and unwinding; forms a dumbbell structure of two compact domains connected by a linker; interacts with eIF4G	1.19967	1940	Yes
CKB1	YGL019W	Beta regulatory subunit of casein kinase 2, a Ser/Thr protein kinase with roles in cell growth and proliferation; the holoenzyme also contains CKA1, CKA2 and CKB2, the many substrates include transcription factors and all RNA polymerases	1.19933	1941	No
BET4	YJL031C	Alpha subunit of Type II geranylgeranyltransferase required for vesicular transport between the endoplasmic reticulum and the Golgi; provides a membrane attachment moiety to Rab-like proteins Ypt1p and Sec4p	1.19933	1942	No
KCC4	YCL024W	Protein kinase of the bud neck involved in the septin checkpoint, associates with septin proteins, negatively regulates Swe1p by phosphorylation, shows structural homology to bud neck kinases Gin4p and Hsl1p	1.19933	1943	No
BOP2	YLR267W	Protein of unknown function	1.19933	1944	No
YAR047C	YAR047C	Dubious open reading frame unlikely to encode a protein, based on available experimental and comparative sequence data	1.19933	1945	No
TYW1	YPL207W	Protein required for the synthesis of wybutosine, a modified guanosine found at the 3'-position adjacent to the anticodon of phenylalanine tRNA which supports reading frame maintenance by stabilizing codon-anticodon interactions	1.19933	1946	No
UFO1	YML088W	F-box receptor protein, subunit of the Skp1-Cdc53-F-box receptor (SCF) E3 ubiquitin ligase complex; binds to phosphorylated Ho endonuclease, allowing its ubiquitylation by SCF and subsequent degradation	1.19933	1947	No
CAB1	YDR531W	Pantothenate kinase (ATP:D-pantothenate 4'-phosphotransferase, EC 2.7.1.33); catalyzes the first committed step in the universal biosynthetic pathway for synthesis of coenzyme A (CoA)	1.19933	1948	No
YAT2	YER024W	Carnitine acetyltransferase; has similarity to Yat1p, which is a carnitine acetyltransferase associated with the mitochondrial outer membrane	1.19933	1949	No
ICS2	YBR157C	Protein of unknown function; null mutation does not confer any obvious defects in growth, spore germination, viability, or carbohydrate utilization	1.19933	1950	No
TIM17	YJL143W	Essential subunit of the Translocase of the Inner Mitochondrial membrane (TIM23 complex); with Tim23p, contributes to the architecture and function of the import channel; may link the import motor to the core TIM23 complex	1.19933	1951	No
PEX22	YAL055W	Putative peroxisomal membrane protein required for import of peroxisomal proteins, functionally complements a Pichia pastoris pex22 mutation	1.19867	1952	No
BEM1	YBR200W	Protein containing SH3-domains, involved in establishing cell polarity and morphogenesis; functions as a scaffold protein for complexes that include Cdc24p, Ste5p, Ste20p, and Rsr1p	1.19867	1953	No
THI80	YOR143C	Thiamine pyrophosphokinase, phosphorylates thiamine to produce the coenzyme thiamine pyrophosphate (thiamine diphosphate)	1.19833	1954	No
PRE10	YOR362C	Alpha 7 subunit of the 20S proteasome	1.198	1955	No
IMD4	YML056C	Inosine monophosphate dehydrogenase, catalyzes the first step of GMP biosynthesis, member of a four-gene family in S. cerevisiae, constitutively expressed	1.19767	1956	No
YOP1	YPR028W	Membrane protein that interacts with Yip1p to mediate membrane traffic; interacts with Sey1p to maintain ER morphology; overexpression leads to cell death and accumulation of internal cell membranes	1.19767	1957	No
MRP49	YKL167C	Mitochondrial ribosomal protein of the large subunit, not essential for mitochondrial translation	1.19737	1958	Yes
NSR1	YGR159C	Nucleolar protein that binds nuclear localization sequences, required for pre-rRNA processing and ribosome biogenesis	1.19737	1959	Yes
SHE3	YBR130C	Protein that acts as an adaptor between Myo4p and the She2p-mRNA complex; part of the mRNA localization machinery that restricts accumulation of certain proteins to the bud; also required for cortical ER inheritance	1.19737	1960	Yes
PBP2	YBR233W	RNA binding protein with similarity to mammalian heterogeneous nuclear RNP K protein, involved in the regulation of telomere position effect and telomere length	1.19737	1961	Yes
ECM3	YOR092W	Non-essential protein of unknown function; involved in signal transduction and the genotoxic response; induced rapidly in response to treatment with 8-methoxypsoralen and UVA irradiation	1.19733	1962	No
CIC1	YHR052W	Essential protein that interacts with proteasome components and has a potential role in proteasome substrate specificity; also copurifies with 66S pre-ribosomal particles	1.19733	1963	No
AIM8	YDR493W	Protein of unknown function; overexpression causes a cell cycle delay or arrest; null mutant displays severe respiratory growth defect and elevated frequency of mitochondrial genome loss; detected in mitochondria in high-throughput studies	1.19733	1964	No
HSE1	YHL002W	Subunit of the endosomal Vps27p-Hse1p complex required for sorting of ubiquitinated membrane proteins into intralumenal vesicles prior to vacuolar degradation, as well as for recycling of Golgi proteins and formation of lumenal membranes	1.19733	1965	No
KEL1	YHR158C	Protein required for proper cell fusion and cell morphology; functions in a complex with Kel2p to negatively regulate mitotic exit, interacts with Tem1p and Lte1p; localizes to regions of polarized growth; potential Cdc28p substrate	1.19733	1966	No
RIT1	YMR283C	2'-O-ribosyl phosphate transferase, modifies the initiator methionine tRNA at position 64 to distinguish it from elongator methionine tRNA	1.19722	1967	Yes
SEC65	YML105C	Subunit of the signal recognition particle (SRP), involved in protein targeting to the ER; interacts with Srp54p; homolog of mammalian SRP19	1.19722	1968	Yes
CDC23	YHR166C	Subunit of the Anaphase-Promoting Complex/Cyclosome (APC/C), which is a ubiquitin-protein ligase required for degradation of anaphase inhibitors, including mitotic cyclins, during the metaphase/anaphase transition	1.197	1969	No
YMR244W	YMR244W	Putative protein of unknown function	1.197	1970	No
PRO3	YER023W	Delta 1-pyrroline-5-carboxylate reductase, catalyzes the last step in proline biosynthesis	1.197	1971	No
YJL055W	YJL055W	Putative protein of unknown function, proposed to be involved in the metabolism of purine and pyrimidine base analogues; deletion mutants are sensitive to HAP and AHA; overexpression confers resistance to 5-FOA and 5-FU	1.197	1972	No
[truncated: 1,985 more rows]
